# Supplementary material for: Interrogating the recognition landscape of a conserved HIV-specific TCR reveals distinct bacterial peptide cross-reactivity
Source: eLife. 2020 Jul 27;9:e58128. doi: 10.7554/eLife.58128 (PMC7384859; doi:10.7554/eLife.58128)
Supplement: Figure 2—source data 3. [file elife-58128-fig2-data3.xlsx]

## Sheet: B57-Rd3-AA_counts
Residue	A	C	D	E	F	G	H	I	K	L	M	N	P	Q	R	S	T	V	W	Y	-
1	83817	2180	509	12332	751	274646	802	690	338482	206519	362	352092	318	166	232243	355357	403	11942	168675	35025
2	39669	20	13	7	172	5		25	201	629	389	36	413	2	90	1549164	486140	30	67	239
3	98	110030	201	10197	636510	224840	1262	249118	246	610879	7189	6503	680	100	1214	12991	334	41364	703	162852
4	62101	1702	250	284	594	752	27754	540	360679	755	856	712	335	7550	682286	155931	145471	493751	2694	132314
5	315	158	32	18	48	126	831	75	292	3339	19	14	2067571	327	668	1850	1392	94	33	109
6	533	23	1632	2067550	85	2305	31	34	1269	313	102	92	75	254	181	323	437	1821	194	57
7	295	126	181	181	4168	444	117	1030160	176	405214	1690	304	452	9667	535	1103	639	621541	157	161
8	66726	685	111	84	179	24198	896	61	213855	23622	517	591	475830	4918	1255521	6266	1038	1484	697	32
9	12514	265	340690	560389	484	172095	17468	874	944	234185	507206	223	210965	13443	920	966	390	2323	427	540
10	243360	473	569	294	226724	24426	1468	38930	33304	75196	478008	384	128	507	136700	26088	495	184957	379	604921
11	1	3446	15	2	1096027	580	12	183	3	6480	1	15		2	556	383		421	910449	58735

## Sheet: Sheet1
Residue	A	C	D	E	F	G	H	I	K	L	M	N	P	Q	R	S	T	V	W	Y
1	83817	2180	509	12332	751	274646	802	690	338482	206519	362	352092	318	166	232243	355357	403	11942	168675	35025			K	A	F	S	P	E	V	I	P	M	F
2	39669	20	13	7	172	5		25	201	629	389	36	413	2	90	1549164	486140	30	67	239		A	83817	39669	98	62101	315	533	295	66726	12514	243360	1
3	98	110030	201	10197	636510	224840	1262	249118	246	610879	7189	6503	680	100	1214	12991	334	41364	703	162852		C	2180	20	110030	1702	158	23	126	685	265	473	3446
4	62101	1702	250	284	594	752	27754	540	360679	755	856	712	335	7550	682286	155931	145471	493751	2694	132314		D	509	13	201	250	32	1632	181	111	340690	569	15
5	315	158	32	18	48	126	831	75	292	3339	19	14	2067571	327	668	1850	1392	94	33	109		E	12332	7	10197	284	18	2067550	181	84	560389	294	2
6	533	23	1632	2067550	85	2305	31	34	1269	313	102	92	75	254	181	323	437	1821	194	57		F	751	172	636510	594	48	85	4168	179	484	226724	1096027
7	295	126	181	181	4168	444	117	1030160	176	405214	1690	304	452	9667	535	1103	639	621541	157	161		G	274646	5	224840	752	126	2305	444	24198	172095	24426	580
8	66726	685	111	84	179	24198	896	61	213855	23622	517	591	475830	4918	1255521	6266	1038	1484	697	32		H	802		1262	27754	831	31	117	896	17468	1468	12
9	12514	265	340690	560389	484	172095	17468	874	944	234185	507206	223	210965	13443	920	966	390	2323	427	540		I	690	25	249118	540	75	34	1030160	61	874	38930	183
10	243360	473	569	294	226724	24426	1468	38930	33304	75196	478008	384	128	507	136700	26088	495	184957	379	604921		K	338482	201	246	360679	292	1269	176	213855	944	33304	3
11	1	3446	15	2	1096027	580	12	183	3	6480	1	15		2	556	383		421	910449	58735		L	206519	629	610879	755	3339	313	405214	23622	234185	75196	6480
																						M	362	389	7189	856	19	102	1690	517	507206	478008	1
	1	2	3	4	5	6	7	8	9	10	11											N	352092	36	6503	712	14	92	304	591	223	384	15
A	83817	39669	98	62101	315	533	295	66726	12514	243360	1		1	1	1							P	318	413	680	335	2067571	75	452	475830	210965	128
C	2180	20	110030	1702	158	23	126	685	265	473	3446		2067571		10							Q	166	2	100	7550	327	254	9667	4918	13443	507	2
D	509	13	201	250	32	1632	181	111	340690	569	15				100							R	232243	90	1214	682286	668	181	535	1255521	920	136700	556
E	12332	7	10197	284	18	2067550	181	84	560389	294	2			2.06757e-10	1000							S	355357	1549164	12991	155931	1850	323	1103	6266	966	26088	383
F	751	172	636510	594	48	85	4168	179	484	226724	1096027			2.06757e-09	10000							T	403	486140	334	145471	1392	437	639	1038	390	495
G	274646	5	224840	752	126	2305	444	24198	172095	24426	580			2.06757e-08	100000							V	11942	30	41364	493751	94	1821	621541	1484	2323	184957	421
H	802		1262	27754	831	31	117	896	17468	1468	12			2.06757e-07	1000000							W	168675	67	703	2694	33	194	157	697	427	379	910449
I	690	25	249118	540	75	34	1030160	61	874	38930	183			2.06757e-06	10000000							Y	35025	239	162852	132314	109	57	161	32	540	604921	58735
K	338482	201	246	360679	292	1269	176	213855	944	33304	3			2.06757e-05	100000000
L	206519	629	610879	755	3339	313	405214	23622	234185	75196	6480			0.000206757	1000000000								0	206757	413514	620271	827028	1033785	1240542	1447299	1654056	1860813	2067570
M	362	389	7189	856	19	102	1690	517	507206	478008	1			0.00206757	10000000000
N	352092	36	6503	712	14	92	304	591	223	384	15			0.0206757	100000000000
P	318	413	680	335	2067571	75	452	475830	210965	128				0.206757	1000000000000
Q	166	2	100	7550	327	254	9667	4918	13443	507	2			2.06757	10000000000000
R	232243	90	1214	682286	668	181	535	1255521	920	136700	556			20.6757	100000000000000
S	355357	1549164	12991	155931	1850	323	1103	6266	966	26088	383			206.757	1000000000000000		206757
T	403	486140	334	145471	1392	437	639	1038	390	495				2067.57	1e+16
V	11942	30	41364	493751	94	1821	621541	1484	2323	184957	421			20675.7	1e+17		2067570
W	168675	67	703	2694	33	194	157	697	427	379	910449			206757	1e+18
Y	35025	239	162852	132314	109	57	161	32	540	604921	58735			2067571	1e+19
	0	206757	413514	620271	827028	1033785	1240542	1447299	1654056	1860813	2067570
