# Supplementary material for: Interrogating the recognition landscape of a conserved HIV-specific TCR reveals distinct bacterial peptide cross-reactivity
Source: eLife. 2020 Jul 27;9:e58128. doi: 10.7554/eLife.58128 (PMC7384859; doi:10.7554/eLife.58128)
Supplement: Source data 1. [file elife-58128-data1.xlsx]

## Sheet: GAGs
gi	255986448	gb	ACU50607.1		Score	8.70659e-10	KAFSPEVXXMF	278. gag protein [Human immunodeficiency virus 1]
gi	9651280	gb	AAF91122.1	AF196675_1	Score	1.99526e-09	RAFSPEVLPMF	9. gag protein, partial [Human immunodeficiency virus 1]
gi	119361821	gb	ABL66844.1		Score	2.9022e-09	KAFSPEVLPMF	91. gag protein [Human immunodeficiency virus 1]
gi	166917908	gb	ABZ03807.1		Score	2.9022e-09	KAFSPEVGPMF	190. gag protein, partial [Human immunodeficiency virus 1]
gi	45644268	gb	AAS72819.1		Score	8.70659e-09	KAFSPEVXPMF	41. gag protein, partial [Human immunodeficiency virus 1]
gi	269308083	gb	ACZ34129.1		Score	2.9022e-08	KAFSPEVKPMF	296. gag protein, partial [Human immunodeficiency virus 1]
