# Supplementary material for: Interrogating the recognition landscape of a conserved HIV-specific TCR reveals distinct bacterial peptide cross-reactivity
Source: eLife. 2020 Jul 27;9:e58128. doi: 10.7554/eLife.58128 (PMC7384859; doi:10.7554/eLife.58128)
Supplement: Source data 2. [file elife-58128-data2.xlsx]

## Sheet: Uniques
	GI number		Reference		JMBlast Score	%ID to KF11 GAG	NR Peptide	Closest Library Hit >60%	Library Peptide	Annotations										NR				Library
gi	430749919	ref	YP_007212827.1		9.42878e-06	42.9	RSLKPEVREVF	KSLAPEVRELF	72.7	605. hypothetical protein Theco_1697 [Thermobacillus composti KWC4]										LTIRPEIRPRW	is	72.7	similar to	GTIRPEIREMW
gi	494716083	ref	WP_007451949.1		8.87415e-06	42.9	ASLRPEVREAF	KSLAPEVRELF	72.7				89 aa protein							SSGAPEVRELF	is	72.7	similar to	SSGVPEVRMMF
gi	493030958	ref	WP_006100357.1		8.06741e-06	42.9	KSLYPEIREVF	RSFYPEIREYF	72.7	778. polyprenyl synthetase superfamily [Coleofasciculus chthonoplastes]			P04215.1 GI	123775						GSLAPEIPLKF	is	72.7	similar to	LSLRPEIPLFF
gi	497464005	ref	WP_009778203.1		4.9397e-06	28.6	LSGVPEIRERW	LSLRPEIREYW	72.7	926. peptidase M13 [Janibacter sp. HTCC2649]										WSSRPEVRGVF	is	72.7	similar to	WTYRPEVRGVW
gi	194701456	gb	ACF84812.1		4.29235e-06	42.9	STFVPELRGYF			220. unknown [Zea mays]		266472	2. RecName	Full=Lipocalin; Flags	Precursor [Rhinella marina]					STLSPELRGRW	is	72.7	similar to	SSFSPELRMRW
gi	302335486	ref	YP_003800693.1		1.31882e-06	35.7	RSLAPEVRGYW	KSLTPEVRGYW	81.8	357. ATP-dependent nuclease subunit B [Olsenella uli DSM 7084]			183 aa protein							STISPELRGRW	is	72.7	similar to	SSFSPELRMRW
gi	392398721	ref	YP_006435322.1		1.10872e-06	42.9	RTLSPELREFF			535. acetyltransferase, ribosomal protein N-acetylase [Flexibacter litoralis DSM 6794]			Q01584.1 GI	266472						SSFSPELLARF	is	72.7	similar to	SSFSPELRMRW
gi	497193348	ref	WP_009507610.1		8.41579e-07	35.7	LTIRPEIRPRW	GTIRPEIREMW	72.7											KSCSPEVRQRF	is	72.7	similar to	KSCTPEVREYF
gi	488856804	ref	WP_002769114.1		6.78388e-07	42.9	ASFKPELPDFF	NSFKPEIPDYF	72.7				3. Ig heavy chain, partial [Heterodontus francisci]							SSGAPEVRELF	is	72.7	similar to	KSLAPEVRDLF
gi	330816192	ref	YP_004359897.1		6.34497e-07	42.9	SSYTPEVPEVF			415. aldehyde oxidase and xanthine dehydrogenase [Burkholderia gladioli BSR3]			139 aa protein							LSLAPEVRAKF	is	72.7	similar to	KSLAPEVRDLF
gi	430004692	emb	CCF20491.1		5.99525e-07	35.7	STISPEIRLFW	GTISPEIREMW	72.7	600. putative large permease component, TRAP-type mannitol/chloroaromatic compound transport system [Rhizobium sp.]			CAA31799.1 GI	295723						KTLAPELLDLF	is	72.7	similar to	KSLAPEVRDLF
gi	258650383	ref	YP_003199539.1		5.76299e-07	28.6	LSGTPELRERW			286. neprilysin [Nakamurella multipartita DSM 44233]										RSLAPEVRGYW	is	81.8	similar to	KSLTPEVRGYW
gi	471573742	gb	EMR71810.1		5.35462e-07	42.9	ASLKPEVPLVF	LSLRPEIPLVF	72.7	665. putative nadph-dependent 1-acyldihydroxyacetone phosphate reductase protein [Eutypa lata UCREL1]		1017427	4. elastic titin, partial [Homo sapiens]							RSFKPELKEFY	is	72.7	similar to	YSFKPELKEIF
gi	490474068	ref	WP_004344501.1		4.96109e-07	28.6	LSLRPELRDAY			740. hypothetical protein [Prevotella buccae]			7962 aa protein							WSFKPELREIY	is	72.7	similar to	YSFKPELKEIF
gi	496349878	ref	WP_009059056.1		4.65619e-07	50	SSLSPEVKLVF			896. alpha-glucan phosphorylase [Methylacidiphilum fumariolicum]			CAA62189.1 GI	1017427						LAFKPELLEIF	is	72.7	similar to	YSFKPELKEIF
gi	495156089	ref	WP_007880892.1		4.33507e-07	42.9	SSGAPEVRELF	SSGVPEVRMMF	72.7	861. hypothetical protein [Herbaspirillum sp. CF444]										KSFRPELKEFY	is	72.7	similar to	ASFRPELAEFW
gi	301092772	ref	XP_002997238.1		4.29712e-07	35.7	SSVVPELPMAF	SSVVPEVRMMF	72.7	353. conserved hypothetical protein [Phytophthora infestans T30-4]		1421799	5. F1-ATPase alpha subunit (mitochondrion) [Petunia axillaris subsp. parodii]							ASLSPELAEVW	is	72.7	similar to	ASFRPELAEFW
gi	348664816	gb	EGZ04655.1		4.29414e-07	42.9	RSFYPELRLLF	RSFYPEIREYF	72.7	462. hypothetical protein PHYSODRAFT_343042 [Phytophthora sojae]			509 aa protein							ASVRPEVAEIW	is	72.7	similar to	ASFRPELAEFW
gi	497177556	ref	WP_009497850.1		3.90275e-07	50	LTISPEIPPYF	GTIRPEIPDYF	72.7	918. haloacid dehalogenase [Sporosarcina newyorkensis]			AAB03873.1 GI	1421799						ESSRPELAEGW	is	72.7	similar to	ASFRPELAEFW
gi	295132633	ref	YP_003583309.1		3.88663e-07	42.9	LTGRPELPPMW			320. alpha-glucosidase [Zunongwangia profunda SM-A87]										RSLAPEVRGYW	is	72.7	similar to	GSLAPEIRMYW
gi	490118072	ref	WP_004018619.1		3.82361e-07	35.7	GSLTPEIAEVF			734. alcohol dehydrogenase [Gordonia terrae]		1523780	6. putative transposase [Ascobolus immersus]							LSLVPEIGHGF	is	72.7	similar to	RSFVPEIGMGF
gi	497797312	ref	WP_010111496.1		3.53779e-07	42.9	ESFRPEIRQYF	RSFYPEIREYF	72.7	932. glutamate synthase [Acinetobacter sp. P8-3-8]			637 aa protein							RAVVPEVRDAF	is	72.7	similar to	RAFVPEVREAW
gi	448510490	ref	XP_003866359.1		2.87726e-07	50	GSLSPELRPIF	LSGSPELRMIF	72.7	618. hypothetical protein CORT_0A05310 [Candida orthopsilosis Co 90-125]			CAA68959.1 GI	1523780						AAVVPEVRAAW	is	72.7	similar to	RAFVPEVREAW
gi	498205596	ref	WP_010519752.1		2.82664e-07	42.9	LTGVPELPPMW			947. glycosyl hydrolase [Mesoflavibacter zeaxanthinifaciens]										WTSSPEIRAVF	is	81.8	similar to	WTSHPEIRAYF
gi	15790131	ref	NP_279955.1		2.68217e-07	35.7	STLSPELRGRW	SSFSPELRMRW	72.7	21. hypothetical protein VNG1023C [Halobacterium sp. NRC-1]		4877322	7. olfactory receptor, partial [Pelophylax esculentus]							WTSHPEIKAAF	is	81.8	similar to	WTSHPEIRAYF
gi	429854036	gb	ELA29069.1		2.56563e-07	35.7	WTLVPELKERF			598. C6 zinc finger domain-containing protein [Colletotrichum gloeosporioides Nara gc5]			165 aa protein							ETFTPEIKDAW	is	72.7	similar to	WTFHPEILDAW
gi	494534058	ref	WP_007323506.1		2.46985e-07	28.6	LSGAPELRERW			838. peptidase M13 [Gordonia araii]			CAB43125.1 GI	4877322						ESIRPEIRQYF	is	72.7	similar to	ESIRPEIRLSW
gi	91077836	ref	XP_971324.1		2.4575e-07	42.9	LSITPELKDMF			67. PREDICTED										LSVRPEIRASW	is	72.7	similar to	ESIRPEIRLSW
gi	313682157	ref	YP_004059895.1		2.18758e-07	42.9	KSFRPELKEFY	ASFRPELAEFW	72.7	386. rieske (2fe-2S) iron-sulfur domain [Sulfuricurvum kujiense DSM 16994]		5852599	8. MHC class II antigen, partial [Amia calva]							LTVAPEVPMVY	is	72.7	similar to	LTFVPEVAMVY
gi	494730351	ref	WP_007466217.1		2.09155e-07	42.9	ESLSPELRERF			843. Protein of unknown function [Micromonospora lupini]			63 aa protein							KTVVPEVRELF	is	72.7	similar to	KTLWPEVRMLF
gi	15643077	ref	NP_228120.1		2.02781e-07	35.7	LTGRPELPPAW			19. alpha-xylosidase YicI [Thermotoga maritima MSB8]			AAD54123.1 GI	5852599						ATCTPELKELY	is	72.7	similar to	NTFTPELKELW
gi	120437325	ref	YP_863011.1		2.0022e-07	42.9	LTGKPELPPMW			99. alpha-glucosidase [Gramella forsetii KT0803]										LTISPEIPPYF	is	72.7	similar to	GTIRPEIPDYF
gi	491436509	ref	WP_005294302.1		1.82596e-07	42.9	LSLRPEVKDGF	LSLRPEIPDYF	72.7	760. hypothetical protein [Acinetobacter sp. NIPH 2100]		9651280	9. gag protein, partial [Human immunodeficiency virus 1]							KSLYPEIREVF	is	72.7	similar to	RSFYPEIREYF
gi	308456918	ref	XP_003090868.1		1.81996e-07	50	KTVVPEVRELF	KTLWPEVRMLF	72.7	372. hypothetical protein CRE_12380 [Caenorhabditis remanei]			247 aa protein							RSFYPELRLLF	is	72.7	similar to	RSFYPEIREYF
gi	13027221	dbj	BAB32697.1		1.68984e-07	35.7	LTGRPEIPPLW			12. alpha-glucosidase III [Bacillus thermoamyloliquefaciens]			AAF91122.1 GI	9651280						ESFRPEIRQYF	is	72.7	similar to	RSFYPEIREYF
gi	361130174	gb	EHL02028.1		1.59356e-07	35.7	ASLVPEIAMLF			476. putative Methyl-CpG-binding domain protein 4 [Glarea lozoyensis 74030]										ASFVPELRQRY	is	72.7	similar to	ASFRPELALRY
gi	491450440	ref	WP_005308226.1		1.57567e-07	35.7	GSGRPELRQRF					10433942	10. unnamed protein product [Homo sapiens]							ASSRPELALAY	is	81.8	similar to	ASFRPELALRY
gi	426226490	ref	XP_004007376.1		1.5219e-07	35.7	NTSKPEIRDVF			590. PREDICTED			1015 aa protein							ESVRPELAERY	is	72.7	similar to	ASFRPELALRY
gi	296129221	ref	YP_003636471.1		1.46362e-07	28.6	LSGAPELRDRW			327. neprilysin [Cellulomonas flavigena DSM 20109]			BAB14069.1 GI	10433942						ASYRPELAALY	is	72.7	similar to	ASFRPELALRY
gi	22831215	dbj	BAC16073.1		1.41648e-07	35.7	ASVVPEVPEAW	RSFVPEVREAW	72.7	30. hypothetical protein [Oryza sativa Japonica Group]										GTYHPEVRMFW	is	72.7	similar to	GTLRPEVRGFW
gi	491144064	ref	WP_005002465.1		1.37445e-07	35.7	LTLVPEIAELF					12963350	11. nucleocapsid protein [Andes virus]							SSSAPELRGVW	is	72.7	similar to	SSGVPEVRGVW
gi	298711459	emb	CBJ32598.1		1.36947e-07	35.7	ESIRPEIRQYF	ESIRPEIRLSW	72.7	340. Glutamate synthase, N-terminal fragment [Ectocarpus siliculosus]			428 aa protein							ASFVPELRQRY	is	72.7	similar to	ASFSPELRMRW
gi	358340371	dbj	GAA48278.1		1.36002e-07	42.9	WSSRPEVRGVF	WTYRPEVRGVW	72.7	474. TBC1 domain family member 23 [Clonorchis sinensis]			AAK11225.1 GI	12963350						LTIRPEIRPRW	is	72.7	similar to	GTIRPEIRGMW
gi	187930863	ref	YP_001901349.1		1.24669e-07	50	RSGVPEVAPAF	RSFVPELKPAF	72.7	212. hypothetical protein Rpic_4988 [Ralstonia pickettii 12J]										LTIRPEIRPRW	is	72.7	similar to	WTIRPEIREMW
gi	123483718	ref	XP_001324088.1		1.14695e-07	35.7	RTYRPELRESF	WTYRPEVREYF	72.7	105. hypothetical protein [Trichomonas vaginalis G3]		13027221	12. alpha-glucosidase III [Bacillus thermoamyloliquefaciens]							LSVRPEIRASW	is	72.7	similar to	LSLRPEIRSFW
gi	434387145	ref	YP_007097756.1		1.13742e-07	35.7	GSLAPEIPLKF	LSLRPEIPLFF	72.7	610. hypothetical protein Cha6605_3219 [Chamaesiphon minutus PCC 6605]			770 aa protein							LSLRPEVKDGF	is	72.7	similar to	LSLRPEIPDYF
gi	222478957	ref	YP_002565194.1		1.10986e-07	35.7	STISPELRGRW	SSFSPELRMRW	72.7	247. alcohol dehydrogenase zinc-binding domain protein [Halorubrum lacusprofundi ATCC 49239]			BAB32697.1 GI	13027221						GSLAPEIPLKF	is	72.7	similar to	LSLRPEIPLLF
gi	493174282	ref	WP_006175872.1		1.09138e-07	35.7	GSCVPELKGFF			784. nitrate reductase [Enterobacter cancerogenus]										RSLAPEVRGYW	is	72.7	similar to	KSLTPEVRGYF
gi	282164556	ref	YP_003356941.1		1.09121e-07	35.7	GTYYPEVRMLW			303. hypothetical protein MCP_1886 [Methanocella paludicola SANAE]		13541844	13. hypothetical protein TVN1013 [Thermoplasma volcanium GSS1]							SSVVPELPMAF	is	72.7	similar to	SSVVPEVRMMF
gi	508152199	gb	EOT28986.1		1.07644e-07	42.9	LTLTPEIAPYF	LTMTPEIVEYF	72.7	981. hypothetical protein OMQ_01508 [Enterococcus saccharolyticus ATCC 43076]			282 aa protein							LTIRPEIRPRW	is	72.7	similar to	GTIRPEIRVMW
gi	493891861	ref	WP_006837855.1		1.05837e-07	42.9	KSLSPELADVW			816. sporulation protein [Bacillus sp. SG-1]			NP_111532.1 GI	13541844						SSGAPEVRELF	is	81.8	similar to	SSGVPEVRMLF
gi	449303455	gb	EMC99462.1		1.04955e-07	42.9	SALTPEVRDAW			619. hypothetical protein BAUCODRAFT_337528 [Baudoinia compniacensis UAMH 10762]										STISPEIRLFW	is	72.7	similar to	GTISPEIREMW
gi	224369428	ref	YP_002603592.1		1.00742e-07	35.7	LSGVPEILDAF			249. excinuclease ABC subunit C [Desulfobacterium autotrophicum HRM2]		14521395	14. hypothetical protein PAB1589 [Pyrococcus abyssi GE5]							SSGAPEVRELF	is	72.7	similar to	SSGVPEVRLMF
gi	115446715	ref	NP_001047137.1		1.00714e-07	42.9	NSIAPELPPVF			79. Os02g0557200 [Oryza sativa Japonica Group]			344 aa protein							RSLKPEVREVF	is	72.7	similar to	KSLAPEVRELF
gi	218190977	gb	EEC73404.1		1.00714e-07	42.9	SSIAPELPPVF			237. hypothetical protein OsI_07659 [Oryza sativa Indica Group]			NP_126871.1 GI	14521395						ASLRPEVREAF	is	72.7	similar to	KSLAPEVRELF
gi	491409484	ref	WP_005267303.1		9.60498e-08	28.6	LSGTPELKERW			758. zinc metalloproteinase [Arthrobacter crystallopoietes]										KSLYPEIREVF	is	72.7	similar to	KSLAPEVRELF
gi	148653704	ref	YP_001280797.1		9.12978e-08	35.7	ESYRPEIRQYF			144. ferredoxin-dependent glutamate synthase [Psychrobacter sp. PRwf-1]		14591555	15. hypothetical protein PH1802 [Pyrococcus horikoshii OT3]							SSGAPEVRELF	is	81.8	similar to	KSLAPEVRELF
gi	295723	emb	CAA31799.1		9.08208e-08	35.7	NSYAPEIKDRF			3. Ig heavy chain, partial [Heterodontus francisci]			224 aa protein							KTVVPEVRELF	is	72.7	similar to	KSLAPEVRELF
gi	301626092	ref	XP_002942231.1		9.06682e-08	57.1	KSVSPEVKEFF						NP_143637.1 GI	14591555						ATLAPEVREGF	is	72.7	similar to	KSLAPEVRELF
gi	496534131	ref	WP_009240822.1		8.86281e-08	35.7	STGHPELREAF			910. MULTISPECIES										LSLAPEVRAKF	is	72.7	similar to	KSLAPEVRELF
gi	198416373	ref	XP_002127211.1		8.65392e-08	50	SALHPEIRMMF	SALRPEIREMW	72.7	228. PREDICTED		14600658	16. 50S ribosomal protein L24 [Aeropyrum pernix K1]							RAFVPEVPLVF	is	72.7	similar to	RAFVPEVRGVW
gi	305667631	ref	YP_003863918.1		8.24436e-08	42.9	LTGTPELPPMW			366. alpha-glucosidase [Maribacter sp. HTCC2170]			132 aa protein							KAFRPEVLGVW	is	72.7	similar to	RAFVPEVRGVW
gi	491106697	ref	WP_004966522.1		7.80754e-08	50	KSFRPELRQSF	KSFVPELKPSF	72.7	751. hypothetical protein [Haloarcula sinaiiensis]			NP_147176.1 GI	14600658						GAVVPEVPGVW	is	72.7	similar to	RAFVPEVRGVW
gi	152989786	ref	YP_001355508.1		7.74769e-08	35.7	RSFKPELKEFY	YSFKPELKEIF	72.7	157. sulfur oxidation protein, Rieske-I iron sulfur protein SoxL [Nitratiruptor sp. SB155-2]										RTYRPELRESF	is	72.7	similar to	WTYRPEVREYF
gi	284029182	ref	YP_003379113.1		7.57421e-08	28.6	LTGAPELRERW			306. Neprilysin [Kribbella flavida DSM 17836]		15597602	17. hypothetical protein PA2406 [Pseudomonas aeruginosa PAO1]							SSGAPEVRELF	is	72.7	similar to	SSGVPEVRMIF
gi	490075560	ref	WP_003977735.1		7.37649e-08	28.6	ATYVPEIRDYY			730. hypothetical protein [Streptomyces lividans]			186 aa protein							WSSRPEVRGVF	is	81.8	similar to	WSYRPEVRGVW
gi	408357752	ref	YP_006846283.1		7.01541e-08	35.7	LTLTPEIAERF	LTMTPEIVEYF	72.7	578. hydrolase [Amphibacillus xylanus NBRC 15112]			NP_251096.1 GI	15597602						SSSYPEIRQKW	is	72.7	similar to	SSFYPEIREYW
gi	89894067	ref	YP_517554.1		6.57344e-08	42.9	RSIAPEVADYF			65. hypothetical protein DSY1321 [Desulfitobacterium hafniense Y51]										LTIRPEIRPRW	is	72.7	similar to	GTIRPEIREIW
gi	307354456	ref	YP_003895507.1		6.49044e-08	42.9	NTLYPELKPVF			370. hypothetical protein Mpet_2322 [Methanoplanus petrolearius DSM 11571]		15600887	18. clpB protein [Vibrio cholerae O1 biovar El Tor str. N16961]							KSCSPEVRQRF	is	72.7	similar to	KSCTPEVRMMF
gi	345006969	ref	YP_004809821.1		6.28353e-08	35.7	NTFAPEIRDAY			455. NurA domain-containing protein [halophilic archaeon DL31]			869 aa protein							SSGAPEVRELF	is	72.7	similar to	NSLAPEVRDLF
gi	310780112	ref	YP_003968444.1		6.16131e-08	57.1	GSYSPEVLEMF			375. methyltransferase small [Ilyobacter polytropus DSM 2926]			NP_232517.1 GI	15600887						LSLAPEVRAKF	is	72.7	similar to	NSLAPEVRDLF
gi	384494828	gb	EIE85319.1		6.14693e-08	35.7	WSFKPELREIY	YSFKPELKEIF	72.7	511. hypothetical protein RO3G_10029 [Rhizopus delemar RA 99-880]										RSLKPEVREVF	is	72.7	similar to	KSLTPEVREYF
gi	367034399	ref	XP_003666482.1		6.06623e-08	42.9	GSLSPELPLSF			479. non-ribosomal peptide synthetase [Myceliophthora thermophila ATCC 42464]		15643077	19. alpha-xylosidase YicI [Thermotoga maritima MSB8]							ASLRPEVREAF	is	72.7	similar to	KSLTPEVREYF
gi	358331706	dbj	GAA50483.1		6.05599e-08	50	LTVSPEIKEMF			472. intraflagellar transport protein 46 homolog [Clonorchis sinensis]			764 aa protein							KSLYPEIREVF	is	72.7	similar to	KSLTPEVREYF
gi	390956576	ref	YP_006420333.1		5.92592e-08	57.1	RAFVPEVPLVF	RAFVPEVRGVW	72.7	534. hypothetical protein Terro_0661 [Terriglobus roseus DSM 18391]			NP_228120.1 GI	15643077						ASFKPELPDFF	is	72.7	similar to	NSFKPEIPDYF
gi	493509961	ref	WP_006464320.1		5.47787e-08	35.7	ESIRPELRQYF			800. glutamate synthase [Herbaspirillum frisingense]										GSLAPEIPLKF	is	72.7	similar to	RSLRPEIPLFF
gi	145294308	ref	YP_001137129.1		5.40942e-08	42.9	KTLSPELRDFY			122. hypothetical protein cgR_0263 [Corynebacterium glutamicum R]		15643985	20. hypothetical protein TM1229 [Thermotoga maritima MSB8]							ETIRPELRQYF	is	72.7	similar to	GTIRPEVREYF
gi	497459436	ref	WP_009773634.1		5.3361e-08	28.6	LSGTPEIRARW			925. peptidase M13 [marine actinobacterium PHSC20C1]			482 aa protein							LTIRPEIRPRW	is	72.7	similar to	VTIRPEIREMW
gi	388580582	gb	EIM20896.1		5.28528e-08	28.6	GSYTPEIKLLW			523. MFS general substrate transporter [Wallemia sebi CBS 633.66]			NP_229034.1 GI	15643985						LSGVPEIRERW	is	72.7	similar to	LSLRPEIREYW
gi	460380446	ref	XP_004235967.1		5.1516e-08	35.7	LSSAPEIRDVF			638. PREDICTED										LSVRPEIRASW	is	72.7	similar to	LSLRPEIREYW
gi	147918962	ref	YP_687312.1		5.00138e-08	35.7	GTYHPEVRMFW	GTLRPEVRGFW	72.7	136. hypothetical protein RRC244 [Methanocella arvoryzae MRE50]		15790131	21. hypothetical protein VNG1023C [Halobacterium sp. NRC-1]							RSFYPELRLLF	is	72.7	similar to	RSFYPEIPLFF
gi	489942989	ref	WP_003846296.1		4.94398e-08	28.6	SSYKPELGEAW						338 aa protein							VSFAPEILLFF	is	72.7	similar to	RSFYPEIPLFF
gi	332290925	ref	YP_004429534.1		4.91589e-08	35.7	LTGVPELPPLW			419. Alpha-glucosidase [Dokdonia sp. 4H-3-7-5]			NP_279955.1 GI	15790131						WSSRPEVRGVF	is	72.7	similar to	WTFRPEVRGVW
gi	196001369	ref	XP_002110552.1		4.84704e-08	28.6	NSSVPEIRDFY			222. hypothetical protein TRIADDRAFT_50060 [Trichoplax adhaerens]										KAFRPEVLGVW	is	72.7	similar to	WTFRPEVRGVW
gi	89056307	ref	YP_511758.1		4.83706e-08	28.6	GSLVPELAESW			64. twin-arginine translocation pathway signal [Jannaschia sp. CCS1]		15800600	22. hypothetical protein Z1075 [Escherichia coli O157	H7 str. EDL933]						GSLAPEIPLKF	is	72.7	similar to	FSLRPEIPLFF
gi	57640399	ref	YP_182877.1		4.83426e-08	35.7	STVVPEIAEAF			51. hypothetical protein TK0464 [Thermococcus kodakarensis KOD1]			125 aa protein							SSGAPEVRELF	is	72.7	similar to	SSGFPEVRMMF
gi	497913492	ref	WP_010227648.1		4.65619e-08	35.7	ASLKPELLEFF	NSLKPELKEIF	72.7	938. phosphohydrolase [Gillisia marina]			NP_286614.1 GI	15800600						LTIRPEIRPRW	is	72.7	similar to	LSLRPEIRPVW
gi	491127813	ref	WP_004986246.1		4.63415e-08	35.7	LTIVPELRLSF			753. transport integral membrane protein [Streptomyces ghanaensis]										LSVRPEIRASW	is	72.7	similar to	LSLRPEIRPVW
gi	256825947	ref	YP_003149907.1		4.48842e-08	28.6	LTGAPELRDRW			284. endothelin-converting enzyme [Kytococcus sedentarius DSM 20547]		15835055	23. adherence factor [Chlamydia muridarum str. Nigg]							RSGVPEVAPAF	is	72.7	similar to	RSFVPELKPAF
gi	496691228	ref	WP_009332771.1		4.46498e-08	35.7	ASLSPELAEVW	ASFRPELAEFW	72.7	913. MULTISPECIES			3255 aa protein							RSVVPELKGAY	is	72.7	similar to	RSFVPELKPAF
gi	489423532	ref	WP_003329230.1		4.45423e-08	42.9	LTITPEIAPYF	LTMTPEIVEYF	72.7	713. HAD superfamily hydrolase [Bacillus azotoformans]			NP_296814.1 GI	15835055						GSLSPELRPIF	is	72.7	similar to	LSGSPELRMIF
gi	449548620	gb	EMD39586.1		4.44312e-08	35.7	SSGSPEIRLLY	SSLRPEIRLLW	72.7	626. hypothetical protein CERSUDRAFT_111898 [Ceriporiopsis subvermispora B]										LSFSPELAAIF	is	72.7	similar to	LSGSPELRMIF
gi	156373038	ref	XP_001629341.1		4.3767e-08	42.9	KSGKPELPGGF			167. predicted protein [Nematostella vectensis]		15966648	24. xylulose kinase [Sinorhizobium meliloti 1021]							KALVPELLAAF	is	72.7	similar to	KSLVPELKPAF
gi	463338413	gb	EMK02939.1		4.2422e-08	35.7	RSITPEIALRF			642. addiction module antidote protein HigA [Leptospira santarosai str. CBC613]			484 aa protein							RAFVPEVPLVF	is	72.7	similar to	RAFVPEVRMMF
gi	116327816	ref	YP_797536.1		4.23993e-08	42.9	ASFKPELPAFF			82. DNA methylase [Leptospira borgpetersenii serovar Hardjo-bovis str. L550]			NP_387001.1 GI	15966648						RAVVPEVRDAF	is	72.7	similar to	RAFVPEVRMMF
gi	154317581	ref	XP_001558110.1		4.21257e-08	42.9	RTYKPEVKLRF			161. hypothetical protein BC1G_03142 [Botrytis cinerea B05.10]										RAFSPEVLPMF	is	72.7	similar to	RAFVPEVRMMF
gi	493054902	ref	WP_006113688.1		4.16199e-08	28.6	STIAPELRGRW			779. oxidoreductase (Zn-dependent dehydrogenase, threonine 3-dehydrogenase) [Halorubrum coriense]		18406092	25. MEI2-like 2 protein [Arabidopsis thaliana]							SSVVPELPMAF	is	72.7	similar to	SSGVPELKPAF
gi	496442777	ref	WP_009151622.1		4.1548e-08	28.6	GTLYPEIALFW			904. putative membrane protein [Thiorhodovibrio sp. 970]			843 aa protein							RSGVPEVAPAF	is	72.7	similar to	SSGVPELKPAF
gi	357620597	gb	EHJ72744.1		4.13883e-08	35.7	SSLRPELGDKF			469. hypothetical protein KGM_13668 [Danaus plexippus]			NP_565990.1 GI	18406092						SSSVPELAAAF	is	72.7	similar to	SSGVPELKPAF
gi	296101978	ref	YP_003612124.1		3.96864e-08	35.7	GSCVPELKGLF			324. nitrate reductase catalytic subunit [Enterobacter cloacae subsp. cloacae ATCC 13047]										ASFKPELPDFF	is	72.7	similar to	NSLKPEIPDFF
gi	507806979	gb	EOS63872.1		3.84845e-08	50	WTLSPEVAERF	FTLSPEVAMFF	72.7	977. hypothetical protein C816_03646 [Oscillibacter sp. 1-3]		18978217	26. murein hydrolase [Pyrococcus furiosus DSM 3638]							WSSRPEVRGVF	is	72.7	similar to	WTYRPEVRGVC
gi	406884781	gb	EKD32126.1		3.81527e-08	35.7	YTYTPEIPEVF			574. hypothetical protein ACD_77C00174G0016 [uncultured bacterium]			224 aa protein							SSVVPELPMAF	is	72.7	similar to	KSVVPELKPAF
gi	320580183	gb	EFW94406.1		3.66336e-08	35.7	LSIVPELKGKF						NP_579574.1 GI	18978217						RSVVPELKGAY	is	72.7	similar to	KSVVPELKPAF
gi	483522094	gb	EOB06942.1		3.52598e-08	35.7	YSITPELRLLF			682. hypothetical protein Anapl_08142 [Anas platyrhynchos]										SSFSPELLARF	is	72.7	similar to	SSFSPELRMRC
gi	146300496	ref	YP_001195087.1		3.48209e-08	35.7	LTGKPELPPLW			129. alpha-glucosidase [Flavobacterium johnsoniae UW101]		19112964	27. morphogenesis protein Mor2 [Schizosaccharomyces pombe 972h-]							VSFAPEILLFF	is	72.7	similar to	LSLRPEILLFF
gi	497547925	ref	WP_009862123.1		3.35808e-08	42.9	WSGSPEIRALF						2196 aa protein							SSGAPEVRELF	is	72.7	similar to	SSGVPEVRIMF
gi	507039792	ref	WP_016111456.1		3.35808e-08	35.7	YSYRPEIKDIF			968. hypothetical protein [Bacillus cereus]			NP_596172.1 GI	19112964						WSSRPEVRGVF	is	72.7	similar to	WTYRPEVRGVL
gi	488825366	ref	WP_002737772.1		3.20544e-08	57.1	KSCSPEVRQRF	KSCTPEVREYF	72.7	702. NACHT domain protein [Microcystis aeruginosa]										KSLKPEILDKY	is	72.7	similar to	NSLKPEILDYF
gi	383778056	ref	YP_005462622.1		3.09241e-08	42.9	SALRPEVRDFY			507. hypothetical protein AMIS_28860 [Actinoplanes missouriensis 431]		19704333	28. dipeptide-binding protein [Fusobacterium nucleatum subsp. nucleatum ATCC 25586]							SSGSPEIRLLY	is	72.7	similar to	SSLRPEIRLLW
gi	493940284	ref	WP_006884467.1		3.05018e-08	35.7	LSLTPELLERF			817. sugar-specific transcriptional regulator TrmB [Halosimplex carlsbadense]			500 aa protein							ETLRPEIAESW	is	72.7	similar to	GTLRPEIREMW
gi	335290316	ref	XP_003356141.1		3.03596e-08	42.9	AAGRPEVRLAW						NP_603895.1 GI	19704333						ASLKPEVPLVF	is	72.7	similar to	LSLRPEIPLVF
gi	493495832	ref	WP_006450441.1		2.97797e-08	42.9	GTLSPEIAEIF			799. cAMP-binding protein [Xanthomonas gardneri]										GSLAPEIPLKF	is	72.7	similar to	LSLRPEIPLVF
gi	402224361	gb	EJU04424.1		2.95099e-08	28.6	LSGVPELPELY			560. hypothetical protein DACRYDRAFT_105484 [Dacryopinax sp. DJM-731 SS1]		20260704	29. aminopeptidase N [Manduca sexta]							LSLHPELKLVF	is	72.7	similar to	LSLRPEIPLVF
gi	269308083	gb	ACZ34129.1		2.9022e-08	85.7	KAFSPEVKPMF			296. gag protein, partial [Human immunodeficiency virus 1]			1010 aa protein							LSLSPEIGQVF	is	72.7	similar to	LSLRPEIPLVF
gi	188575627	ref	YP_001912556.1		2.81346e-08	57.1	KAVVPEVRDAF			213. transposase TnpA, ISL3 family [Xanthomonas oryzae pv. oryzae PXO99A]			AAM13691.1 GI	20260704						GSLAPEIPLKF	is	72.7	similar to	ISLRPEIPLFF
gi	490095441	ref	WP_003997361.1		2.68646e-08	42.9	RSYSPELRGSF			732. putative Iron transporter [Streptomyces viridochromogenes]										LTIRPEIRPRW	is	81.8	similar to	GTIRPEIRERW
gi	497460065	ref	WP_009774263.1		2.6193e-08	42.9	GAGAPEIRDAF					22831215	30. hypothetical protein [Oryza sativa Japonica Group]							EALHPEVRLKW	is	72.7	similar to	KTLHPEVRLSW
gi	403295692	ref	XP_003938765.1		2.56435e-08	35.7	ASSVPELRGRF						407 aa protein							SSGAPEVRELF	is	72.7	similar to	SSGVPEVRMRF
gi	494039673	ref	WP_006981799.1		2.42352e-08	28.6	VSIKPEIRAAW			826. outer membrane autotransporter barrel domain protein [Chthoniobacter flavus]			BAC16073.1 GI	22831215						RSLAPEVRGYW	is	72.7	similar to	RSFYPEIRGYW
gi	344256373	gb	EGW12477.1		2.38867e-08	42.9	GSSSPEVKGYW			454. Poly(rC)-binding protein 2 [Cricetulus griseus]										LTIRPEIRPRW	is	72.7	similar to	GTIRPEIRKMW
gi	310825319	ref	YP_003957677.1		2.35066e-08	35.7	ASVRPELKDRF			378. sigma54 specific transcriptional regulator [Stigmatella aurantiaca DW4/3-1]		23450990	31. xylulose kinase [Escherichia coli]							GSLAPEIPLKF	is	72.7	similar to	LSLQPEIPLFF
gi	491532593	ref	WP_005390216.1		2.3416e-08	42.9	VTFKPEIAEVF			761. uracil-xanthine permease [Corynebacterium glucuronolyticum]			487 aa protein							RSLAPEVRGYW	is	81.8	similar to	NSLTPEVRGYW
gi	495958574	ref	WP_008683153.1		2.30499e-08	28.6	NTLTPEIGLAW			889. histidine kinase [Desulfovibrio sp. 3_1_syn3]			AAN32628.1 GI	23450990						LSLVPEIGHGF	is	72.7	similar to	SSFVPEIGMGF
gi	134093603	ref	YP_001098678.1		2.28245e-08	35.7	ESVRPEIRQYF			119. glutamate synthase [Herminiimonas arsenicoxydans]										LTIRPEIRPRW	is	72.7	similar to	RTIRPEIREMW
gi	332661819	ref	YP_004451289.1		2.28245e-08	35.7	LSLHPELKLVF	LSLRPEIPLVF	72.7	422. hypothetical protein Halhy_6600 [Haliscomenobacter hydrossis DSM 1100]		24214310	32. UDP-N-acetylglucosamine 2-epimerase [Leptospira interrogans serovar Lai str. 56601]							ASLKPEVPLVF	is	72.7	similar to	LSLRPEVPLFF
gi	270007408	gb	EFA03856.1		2.26129e-08	42.9	ATFKPEILDFF			301. hypothetical protein TcasGA2_TC013972 [Tribolium castaneum]			387 aa protein							LSLRPEVKDGF	is	72.7	similar to	LSLRPEVPLFF
gi	222056293	ref	YP_002538655.1		2.16602e-08	35.7	GSGKPEVKLAY			246. Fis family transcriptional regulator [Geobacter daltonii FRC-32]			NP_711791.1 GI	24214310						ASVVPEVPEAW	is	72.7	similar to	RSFVPEVREAW
gi	488251709	ref	WP_002322917.1		2.15488e-08	50	KTFYPELLEFF			691. MULTISPECIES										SSGAPEVRELF	is	72.7	similar to	SSGVPEVRMKF
gi	67901618	ref	XP_681065.1		2.14078e-08	35.7	SSGAPEIADLF	SSGVPEVRDLF	72.7	53. hypothetical protein AN7796.2 [Aspergillus nidulans FGSC A4]		25027608	33. hypothetical protein CE1052 [Corynebacterium efficiens YS-314]							RTSTPELPPAF	is	72.7	similar to	RTFVPELKPAF
gi	111223509	ref	YP_714303.1		2.13444e-08	28.6	LSGTPELRARW			75. zinc metalloendopeptidase [Frankia alni ACN14a]			291 aa protein							RTSVPELKDGF	is	72.7	similar to	RTFVPELKPAF
gi	495288636	ref	WP_008013390.1		2.12933e-08	50	LSFSPELLELF						NP_737662.1 GI	25027608						GSLAPEIPLKF	is	72.7	similar to	LSLWPEIPLFF
gi	119499525	ref	XP_001266520.1		2.12399e-08	35.7	ETCRPELRGFF			94. MFS transporter, putative [Neosartorya fischeri NRRL 181]										KSFRPELKEFY	is	72.7	similar to	ASFRPELAEFL
gi	471206937	ref	XP_004260221.1		2.11253e-08	35.7	SSLTPELLLRF			657. protein NUF1, putative [Entamoeba invadens IP1]		27379050	34. transcriptional regulator [Bradyrhizobium diazoefficiens USDA 110]							LTIRPEIRPRW	is	72.7	similar to	GTIRPEIRGVW
gi	452982878	gb	EME82636.1		2.1082e-08	35.7	ETFTPEIKDAW	WTFHPEILDAW	72.7	633. hypothetical protein MYCFIDRAFT_211112 [Pseudocercospora fijiensis CIRAD86]			328 aa protein							KSFRPELRQSF	is	72.7	similar to	KSFVPELKPSF
gi	288940775	ref	YP_003443015.1		2.06167e-08	42.9	ATLAPEVREGF	KSLAPEVRELF	72.7	310. PAS/PAC sensor-containing diguanylate cyclase/phosphodiesterase [Allochromatium vinosum DSM 180]			NP_770579.1 GI	27379050						KSSAPELPPSF	is	72.7	similar to	KSFVPELKPSF
gi	493420495	ref	WP_006376317.1		2.06167e-08	50	LALAPEVPEAF			795. putative dimodular nonribosomal peptide synthetase [Streptomyces turgidiscabies]										ESIRPEIRQYF	is	72.7	similar to	GTIRPEIREYF
gi	498338861	ref	WP_010653017.1		2.03106e-08	35.7	STGRPEILEIF			950. hypothetical protein [Fluoribacter dumoffii]		29611370	35. large subunit aldehyde oxidoreductase, partial [uncultured bacterium]							ETIRPELRQYF	is	72.7	similar to	GTIRPEIREYF
gi	387593025	gb	EIJ88049.1		2.00671e-08	50	NALSPEIRGKF			518. hypothetical protein NEQG_01493 [Nematocida parisii ERTm3]			400 aa protein							EAIRPEIRQYF	is	72.7	similar to	GTIRPEIREYF
gi	496422410	ref	WP_009131257.1		2.00667e-08	42.9	KTGKPEVREIY			902. hypothetical protein [Bacteroides oleiciplenus]			AAO91881.1 GI	29611370						LTIRPEIRPRW	is	72.7	similar to	GTIRPEIREKW
gi	47028635	gb	AAT09166.1		1.93751e-08	42.9	NAYVPEIKDRF			43. immunoglobulin IgM heavy chain, partial [Heterodontus francisci]										STLSPELRGRW	is	72.7	similar to	SSFSPELRRRW
gi	489568657	ref	WP_003473141.1		1.93662e-08	35.7	LSITPELKAYF			715. hypothetical protein [Gracilibacillus halophilus]		32475007	36. serine protease homologue- secreted serine protease [Rhodopirellula baltica SH 1]							STISPELRGRW	is	72.7	similar to	SSFSPELRRRW
gi	498085887	ref	WP_010400043.1		1.93425e-08	50	RAVVPEVRDAF	RAFVPEVREAW	72.7	944. transposase [Paracoccus sp. TRP]			1047 aa protein							SSFSPELLARF	is	72.7	similar to	SSFSPELRRRW
gi	497994420	ref	WP_010308576.1		1.92845e-08	50	VSFSPEVRDAY			942. histidine kinase [Saccharopolyspora spinosa]			NP_868001.1 GI	32475007						KSCSPEVRQRF	is	72.7	similar to	KSCMPEVREYF
gi	496109290	ref	WP_008833797.1		1.92326e-08	42.9	WSCVPEVAGRF			895. hypothetical protein [Mesorhizobium alhagi]										SSGAPEVRELF	is	81.8	similar to	SSGVPEVRDLF
gi	157737372	ref	YP_001490055.1		1.90983e-08	42.9	STISPEILDAF			171. hypothetical protein Abu_1126 [Arcobacter butzleri RM4018]		37523837	37. hypothetical protein glr4268 [Gloeobacter violaceus PCC 7421]							SSGAPEIADLF	is	72.7	similar to	SSGVPEVRDLF
gi	125545259	gb	EAY91398.1		1.87207e-08	42.9	ASLTPELLPYF			109. hypothetical protein OsI_13022 [Oryza sativa Indica Group]			343 aa protein							RSLAPEVRGYW	is	72.7	similar to	KSLTPEVRGVW
gi	477530877	gb	ENH82602.1		1.80703e-08	50	KTFSPEIKAVW			670. uracil phosphoribosyltransferase [Colletotrichum orbiculare MAFF 240422]			NP_927214.1 GI	37523837						GSLAPEIPLKF	is	72.7	similar to	LSLLPEIPLFF
gi	159472787	ref	XP_001694526.1		1.76344e-08	35.7	STLSPELKEAY			179. predicted protein [Chlamydomonas reinhardtii]										ASLKPEVPLVF	is	72.7	similar to	NSLKPEVPDYF
gi	148269746	ref	YP_001244206.1		1.68984e-08	35.7	LTGRPELPPGW			141. alpha-xylosidase YicI [Thermotoga petrophila RKU-1]		42521732	38. GTP cyclohydrolase I [Bdellovibrio bacteriovorus HD100]							STLSPELRGRW	is	72.7	similar to	SSFSPELRIRW
gi	380013970	ref	XP_003691017.1		1.68739e-08	35.7	YSFTPELRDVY			502. PREDICTED			170 aa protein							STISPELRGRW	is	72.7	similar to	SSFSPELRIRW
gi	489704682	ref	WP_003608819.1		1.67988e-08	35.7	ETIRPELRQYF	GTIRPEVREYF	72.7	717. glutamate synthase [Methylosinus trichosporium]			NP_967112.1 GI	42521732						SSFSPELLARF	is	72.7	similar to	SSFSPELRIRW
gi	321479468	gb	EFX90424.1		1.60558e-08	42.9	SSIRPELAPSF			399. mitochondrial inner membrane protein-like protein [Daphnia pulex]										LTLTPEIAPYF	is	72.7	similar to	LTMTPEIVEYF
gi	188993943	ref	YP_001928195.1		1.55598e-08	35.7	YSLSPELPEAY			214. hypothetical protein PGN_0079 [Porphyromonas gingivalis ATCC 33277]		45198743	39. AFR225Wp [Ashbya gossypii ATCC 10895]							LTLTPEIAERF	is	72.7	similar to	LTMTPEIVEYF
gi	334133392	ref	YP_004532771.1		1.54548e-08	35.7	LSSHPELREAF			427. AAA ATPase [Novosphingobium sp. PP1Y]			1299 aa protein							LTITPEIAPYF	is	72.7	similar to	LTMTPEIVEYF
gi	117616352	gb	ABK42194.1		1.48359e-08	50	GSGAPEVLPYF			84. Erk5 [synthetic construct]			NP_985772.1 GI	45198743						WTLSPEVAERF	is	72.7	similar to	FTLSPEVAMFF
gi	123480697	ref	XP_001323384.1		1.47714e-08	35.7	ETIKPELKEFF			104. hypothetical protein [Trichomonas vaginalis G3]										WSSRPEVRGVF	is	81.8	similar to	WTSRPEVRGVW
gi	322712373	gb	EFZ03946.1		1.47592e-08	35.7	NALTPEIAEAW			405. Globin, subset [Metarhizium robertsii ARSEF 23]		45268962	40. phospholipase C beta [Lytechinus pictus]							LSGVPEIRERW	is	72.7	similar to	LSLRPEIREMW
gi	434392066	ref	YP_007127013.1		1.45411e-08	28.6	SSSAPELRGVW	SSGVPEVRGVW	72.7	611. protein of unknown function DUF187 [Gloeocapsa sp. PCC 7428]			1148 aa protein							LSVRPEIRASW	is	72.7	similar to	LSLRPEIREMW
gi	332797089	ref	YP_004458589.1		1.44957e-08	35.7	SSIRPEVGLYY			423. nucleotide excision repair helicase, Xpb1 [Acidianus hospitalis W1]			AAS55894.1 GI	45268962						SALHPEIRMMF	is	72.7	similar to	SALRPEIREMW
gi	187736353	ref	YP_001878465.1		1.4338e-08	35.7	LTGTPELPPLW			209. Alpha-glucosidase [Akkermansia muciniphila ATCC BAA-835]										SACRPELREMY	is	72.7	similar to	SALRPEIREMW
gi	333895331	ref	YP_004469206.1		1.39507e-08	42.9	STIKPEVKLGF			424. hypothetical protein ambt_19565 [Alteromonas sp. SN2]		45644268	41. gag protein, partial [Human immunodeficiency virus 1]							SAVRPEIAESW	is	72.7	similar to	SALRPEIREMW
gi	162452864	ref	YP_001615231.1		1.37129e-08	50	ATFSPELAERF			187. sigma-54 dependent transcriptional regulator [Sorangium cellulosum So ce56]			147 aa protein							ASLKPELLEFF	is	72.7	similar to	NSLKPELKEIF
gi	145592581	ref	YP_001156878.1		1.3666e-08	28.6	SSLTPEIAGGW			127. valyl-tRNA synthetase [Salinispora tropica CNB-440]			AAS72819.1 GI	45644268						LTIRPEIRPRW	is	72.7	similar to	GTIRPEIRDMW
gi	494795140	ref	WP_007530548.1		1.3169e-08	35.7	SSLAPELLDRF			846. D-2-hydroxyacid dehydrogenase [Rhizobium mesoamericanum]										SSGAPEVRELF	is	81.8	similar to	SSGAPEVRMMF
gi	146413993	ref	XP_001482967.1		1.25417e-08	42.9	SACRPELREMY	SALRPEIREMW	72.7	135. hypothetical protein PGUG_04922 [Meyerozyma guilliermondii ATCC 6260]		46447450	42. hypothetical protein pc1816 [Candidatus Protochlamydia amoebophila UWE25]							KAFRPEVLGVW	is	72.7	similar to	WTYRPEVLGVW
gi	296127320	ref	YP_003634572.1		1.25417e-08	42.9	NSGSPELAEMY			326. ABC transporter substrate-binding protein [Brachyspira murdochii DSM 12563]			732 aa protein							ASLSPELAEVW	is	72.7	similar to	ASFRPELAELW
gi	392557659	gb	EIW51107.1		1.24497e-08	42.9	LSLAPEVRAKF	KSLAPEVRDLF	72.7	539. hypothetical protein TRAVEDRAFT_54892, partial [Trametes versicolor FP-101664 SS1]			YP_008815.1 GI	46447450						ASVRPEVAEIW	is	72.7	similar to	ASFRPELAELW
gi	494481596	ref	WP_007271071.1		1.23803e-08	35.7	GSGRPELALGF			835. hypothetical protein [Arthrobacter gangotriensis]										ESSRPELAEGW	is	72.7	similar to	ASFRPELAELW
gi	307353027	ref	YP_003894078.1		1.19376e-08	28.6	RSLHPELAERW			369. phosphoadenosine phosphosulfate reductase [Methanoplanus petrolearius DSM 11571]		47028635	43. immunoglobulin IgM heavy chain, partial [Heterodontus francisci]							ASYRPELAALY	is	72.7	similar to	ASFRPELAELW
gi	495898486	ref	WP_008623065.1		1.17457e-08	35.7	GTFYPEIADIW			888. peptidase [Paraprevotella clara]			117 aa protein							RSLAPEVRGYW	is	72.7	similar to	GSLAPEIREYW
gi	313677447	ref	YP_004055443.1		1.15854e-08	50	KSIHPELALMF			385. family 2 glycosyl transferase [Marivirga tractuosa DSM 4126]			AAT09166.1 GI	47028635						YSGAPEILEYW	is	72.7	similar to	GSLAPEIREYW
gi	126462719	ref	YP_001043833.1		1.15035e-08	42.9	LALRPELAERF			116. class III aminotransferase [Rhodobacter sphaeroides ATCC 17029]
gi	374312780	ref	YP_005059210.1		1.08802e-08	50	AAGSPELREVF			483. fructose-bisphosphatase [Granulicella mallensis MP5ACTX8]		47209789	44. unnamed protein product, partial [Tetraodon nigroviridis]
gi	498302559	ref	WP_010616715.1		1.07428e-08	42.9	KTIKPEILEIF			948. putative hemagglutinin/hemolysin-related protein [Plautia stali symbiont]			1317 aa protein
gi	493564998	ref	WP_006518349.1		1.06722e-08	28.6	RSITPEIKARW			801. putative nucleotidyltransferase [Leptolyngbya sp. PCC 7375]			CAF91773.1 GI	47209789
gi	242209803	ref	XP_002470747.1		1.06635e-08	35.7	ASIKPEVALLW			264. predicted protein [Postia placenta Mad-698-R]
gi	493800730	ref	WP_006748643.1		1.04968e-08	57.1	KAFRPEIGLFF					47525234	45. chromosomal replication initiation protein [Geobacter sulfurreducens PCA]
gi	471320649	ref	YP_007519679.1		1.03891e-08	35.7	ASGAPEIALAF			658. RNA polymerase [Streptomyces davawensis JCM 4913]			445 aa protein
gi	463334619	gb	EMJ99372.1		1.02757e-08	50	SAIRPEVRGSF			641. transporter, major facilitator family protein [Leptospira sp. B5-022]			YP_016331.1 GI	47525234
gi	493413819	ref	WP_006369746.1		1.01963e-08	42.9	GALTPEIAEVF			794. alcohol dehydrogenase [Gordonia polyisoprenivorans]
gi	495848511	ref	WP_008573090.1		1.00742e-08	35.7	RSYAPELRGSF			887. MULTISPECIES		48478013	46. aldo-keto reductase [Picrophilus torridus DSM 9790]
gi	494843260	ref	WP_007569360.1		9.92351e-09	28.6	LSGRPEIGEVY			852. MULTISPECIES			389 aa protein
gi	10433942	dbj	BAB14069.1		9.83011e-09	28.6	ETLTPEIALYW			10. unnamed protein product [Homo sapiens]			YP_023719.1 GI	48478013
gi	83744461	gb	ABC42551.1		9.50235e-09	35.7	WTLTPELRALF			60. putative 3-hydroyacyl ACP dehydratase [Streptomyces hygroscopicus]
gi	507050848	ref	WP_016121845.1		9.4446e-09	35.7	YSYHPEIKEFF			969. hypothetical protein [Bacillus cereus]		51245244	47. glycine-betaine transporter (BetL) [Desulfotalea psychrophila LSv54]
gi	494384239	ref	WP_007204414.1		9.2683e-09	50	KTSVPEVRLGF						538 aa protein
gi	489265103	ref	WP_003172922.1		9.23472e-09	35.7	LSGRPELLGLF			711. methyl-accepting chemotaxis protein [Pseudomonas fluorescens]			YP_065128.1 GI	51245244
gi	494716144	ref	WP_007452010.1		9.23472e-09	35.7	LSVRPELGDFF
gi	125599668	gb	EAZ39244.1		9.2321e-09	35.7	VSGKPELPEGF			110. hypothetical protein OsJ_23668 [Oryza sativa Japonica Group]		51891408	48. transposase [Symbiobacterium thermophilum IAM 14863]
gi	497431037	ref	WP_009745235.1		9.22061e-09	35.7	YSLSPELPDAY			924. hypothetical protein [Capnocytophaga sp. oral taxon 338]			226 aa protein
gi	91795067	ref	YP_564718.1		9.19633e-09	28.6	LSLAPELAEYY			68. ATP-binding region, ATPase-like protein [Shewanella denitrificans OS217]			YP_074099.1 GI	51891408
gi	495386638	ref	WP_008111341.1		9.12978e-09	35.7	ESVRPELRQYF			869. glutamate synthase [Herbaspirillum sp. YR522]
gi	490019526	ref	WP_003922035.1		9.00694e-09	35.7	GAIRPELREVY					56461671	49. disulfide isomerase [Idiomarina loihiensis L2TR]
gi	322695253	gb	EFY87064.1		8.85554e-09	42.9	NALTPEVAEAW			402. flavohemoglobin [Metarhizium acridum CQMa 102]			204 aa protein
gi	491291098	ref	WP_005149114.1		8.82545e-09	42.9	EALRPEIRQYF			757. glutamate synthase [Mycobacterium rhodesiae]			YP_156952.1 GI	56461671
gi	495660581	ref	WP_008385160.1		8.72063e-09	42.9	ATVVPELAEMF			880. ATPase [Rhodovulum sp. PH10]
gi	45644268	gb	AAS72819.1		8.70659e-09	85.7	KAFSPEVXPMF			41. gag protein, partial [Human immunodeficiency virus 1]		56696683	50. exonuclease, DNA polymerase III, epsilon subunit family [Ruegeria pomeroyi DSS-3]
gi	497225114	ref	WP_009539376.1		8.661e-09	35.7	LTLTPEIKARF			921. NAD-specific glutamate dehydrogenase, large form [Caenispirillum salinarum]			470 aa protein
gi	494304553	ref	WP_007172592.1		8.63179e-09	42.9	GSLSPELAQAF						YP_167044.1 GI	56696683
gi	169627461	ref	YP_001701110.1		8.60214e-09	35.7	ETGRPELAEAF			195. Conserved hypothetical protein [Mycobacterium abscessus]
gi	490081872	ref	WP_003983930.1		8.59668e-09	50	RAYSPELRGAF			731. MULTISPECIES		57640399	51. hypothetical protein TK0464 [Thermococcus kodakarensis KOD1]
gi	302925181	ref	XP_003054047.1		8.52687e-09	28.6	YSGAPEILEYW	GSLAPEIREYW	72.7	362. hypothetical protein NECHADRAFT_75799 [Nectria haematococca mpVI 77-13-4]			263 aa protein
gi	495590515	ref	WP_008315094.1		8.52113e-09	42.9	KSLTPELALSF			878. Carbonic anhydrase [Wohlfahrtiimonas chitiniclastica]			YP_182877.1 GI	57640399
gi	14521395	ref	NP_126871.1		8.42573e-09	42.9	ESIVPELLDMF			14. hypothetical protein PAB1589 [Pyrococcus abyssi GE5]
gi	497289758	ref	WP_009603975.1		8.3952e-09	50	LSSSPEVKGFF			923. beta-lactamase [SAR116 cluster alpha proteobacterium HIMB100]		66362344	52. hypothetical protein [Cryptosporidium parvum Iowa II]
gi	251773070	gb	EES53626.1		8.33327e-09	35.7	GTYKPEVPLVY			268. hypothetical protein UBAL3_74420085 [Leptospirillum ferrodiazotrophum]			254 aa protein
gi	183220360	ref	YP_001838356.1		8.24256e-09	42.9	LSIYPEVGGAF			202. hypothetical protein LEPBI_I0956 [Leptospira biflexa serovar Patoc strain 'Patoc 1 (Paris)']			XP_628136.1 GI	66362344
gi	229819836	ref	YP_002881362.1		8.16077e-09	35.7	LTVTPEVRGLW			259. hypothetical protein Bcav_1341 [Beutenbergia cavernae DSM 12333]
gi	255530469	ref	YP_003090841.1		8.11536e-09	64.3	LAGSPEVKPYF			273. Lantibiotic dehydratase domain-containing protein [Pedobacter heparinus DSM 2366]		67901618	53. hypothetical protein AN7796.2 [Aspergillus nidulans FGSC A4]
gi	239814001	ref	YP_002942911.1		7.8742e-09	35.7	NALRPEIKAFW			260. LysR family transcriptional regulator [Variovorax paradoxus S110]			409 aa protein
gi	146411909	ref	XP_001481926.1		7.8705e-09	50	LSSYPEVKPFF			134. hypothetical protein PGUG_05689 [Meyerozyma guilliermondii ATCC 6260]			XP_681065.1 GI	67901618
gi	187928250	ref	YP_001898737.1		7.70679e-09	42.9	SAGHPELREAF			211. methyltransferase FkbM family protein [Ralstonia pickettii 12J]
gi	167032804	ref	YP_001668035.1		7.6029e-09	35.7	LTVRPEILERF			191. class III aminotransferase [Pseudomonas putida GB-1]		71022605	54. GBA4.USTMA Guanine nucleotide-binding protein alpha-4 subunit [Ustilago maydis 521]
gi	491149910	ref	WP_005008305.1		7.53207e-09	42.9	VSVRPEVALYF						580 aa protein
gi	294661848	ref	NP_001170988.1		7.4749e-09	28.6	GSGVPELAQFW			318. motile sperm domain containing 2 [Gallus gallus]			XP_761532.1 GI	71022605
gi	154685300	ref	YP_001420461.1		7.34469e-09	35.7	KTSTPELREKW			163. hypothetical protein RBAM_008460 [Bacillus amyloliquefaciens subsp. plantarum str. FZB42]
gi	489657387	ref	WP_003561754.1		6.76956e-09	42.9	GALTPELKLFF					71032263	55. hypothetical protein [Theileria parva strain Muguga]
gi	395502315	ref	XP_003755527.1		6.534e-09	28.6	LSVRPEIRASW	ESIRPEIRLSW	72.7	547. PREDICTED			580 aa protein
gi	493341965	ref	WP_006298829.1		6.50821e-09	35.7	KTLRPELAQRW			786. exonuclease I [Hylemonella gracilis]			XP_765773.1 GI	71032263
gi	427719740	ref	YP_007067734.1		6.4872e-09	42.9	NSVSPEIRAKF			592. DGQHR domain-containing protein [Calothrix sp. PCC 7507]
gi	505754885	gb	EOQ99183.1		6.24425e-09	42.9	STFAPELAEIF			963. ATP-dependent RNA helicase DBP8 [Wallemia ichthyophaga EXF-994]		72162606	56. amidase [Thermobifida fusca YX]
gi	488564115	ref	XP_004471753.1		6.17409e-09	28.6	VSLKPELPLFY			695. PREDICTED			476 aa protein
gi	376403628	ref	YP_005089855.1		6.1539e-09	42.9	KTLKPELGGLF			491. rpoC1 gene product (chloroplast) [Pedinomonas minor]			YP_290263.1 GI	72162606
gi	340616526	ref	YP_004734979.1		6.14486e-09	35.7	LTGAPELPPLW			444. alpha-glucosidase [Zobellia galactanivorans]
gi	312109711	ref	YP_003988027.1		6.1056e-09	42.9	KSIHPEIKDSF			380. hypothetical protein GY4MC1_0587 [Geobacillus sp. Y4.1MC1]		73537584	57. elongation factor G [Ralstonia eutropha JMP134]
gi	495426189	ref	WP_008150886.1		6.08083e-09	35.7	NTISPEIKELY						688 aa protein
gi	498456969	ref	WP_010762414.1		6.01645e-09	28.6	WTLVPELGEYY			953. hypothetical protein [Enterococcus haemoperoxidus]			YP_297951.1 GI	73537584
gi	295844302	gb	ADG43148.1		5.92434e-09	35.7	LSIAPELPQVF			322. auxin response factor 14 [Zea mays]
gi	507974364	ref	XP_004691718.1		5.72686e-09	42.9	ESLYPEVPQAF			979. PREDICTED		78776372	58. DNA topoisomerase I [Sulfurimonas denitrificans DSM 1251]
gi	492761362	ref	WP_005955513.1		5.7024e-09	42.9	KSIVPEILPFY			775. phosphonate ABC transporter permease [Peptoniphilus harei]			743 aa protein
gi	48478013	ref	YP_023719.1		5.62464e-09	35.7	ASFVPELRQRY	ASFRPELALRY	72.7	46. aldo-keto reductase [Picrophilus torridus DSM 9790]			YP_392687.1 GI	78776372
gi	338174362	ref	YP_004651172.1		5.61053e-09	28.6	ETSVPEIRLRW			434. hypothetical protein PUV_03680 [Parachlamydia acanthamoebae UV-7]
gi	403418217	emb	CCM04917.1		5.5539e-09	28.6	NSGHPEIRLLY			568. predicted protein [Fibroporia radiculosa]		83310199	59. arginase/agmatinase/formimionoglutamate hydrolase [Magnetospirillum magneticum AMB-1]
gi	218247335	ref	YP_002372706.1		5.49331e-09	35.7	SASKPEIRGVW			239. hypothetical protein PCC8801_2542 [Cyanothece sp. PCC 8801]			297 aa protein
gi	242239270	ref	YP_002987451.1		5.42991e-09	50	KTLSPELRAGF			265. GntR family transcriptional regulator [Dickeya dadantii Ech703]			YP_420463.1 GI	83310199
gi	479208808	ref	YP_007836743.1		5.38829e-09	35.7	STLAPEVKAAW			678. ABC-type sugar transport system, periplasmic component [Faecalibacterium prausnitzii L2-6]
gi	490882735	ref	WP_004744709.1		5.36628e-09	42.9	LTLAPELLLMF			749. hypothetical protein [Vibrio tubiashii]		83744461	60. putative 3-hydroyacyl ACP dehydratase [Streptomyces hygroscopicus]
gi	126348131	emb	CAJ89852.1		5.33593e-09	50	KALRPEVLLAW			115. putative oxidoreductase [Streptomyces ambofaciens ATCC 23877]			347 aa protein
gi	507113574	emb	CDF37198.1		5.28851e-09	42.9	NTCSPELLLYF			972. unnamed protein product [Chondrus crispus]			ABC42551.1 GI	83744461
gi	15966648	ref	NP_387001.1		5.28792e-09	28.6	GTLRPELAARW			24. xylulose kinase [Sinorhizobium meliloti 1021]
gi	20260704	gb	AAM13691.1		5.28264e-09	42.9	YSLSPEIAHMW			29. aminopeptidase N [Manduca sexta]		86605023	61. hypothetical protein CYA_0302 [Synechococcus sp. JA-3-3Ab]
gi	206598151	gb	ACI15958.1		5.26761e-09	57.1	SALSPEVRARF			230. hypothetical protein [Bodo saltans]			422 aa protein
gi	328720018	ref	XP_001950019.2		5.247e-09	42.9	ASSHPEIRPFF			410. PREDICTED			YP_473786.1 GI	86605023
gi	497832241	ref	WP_010146397.1		5.18124e-09	42.9	RTSTPELPPAF	RTFVPELKPAF	72.7	934. RNA polymerase sigma 70 [Serinicoccus profundi]
gi	406032789	ref	YP_006731681.1		5.09516e-09	42.9	GSLKPELGPGF			571. 1,4-dihydroxy-2-naphthoateoctaprenyl transferase [Mycobacterium indicus pranii MTCC 9506]		86740647	62. nitrogen-fixing NifU-like protein [Frankia sp. CcI3]
gi	375361511	ref	YP_005129550.1		5.04948e-09	28.6	RTSTPELREKW			490. NAD(P)H dehydrogenase, quinone family [Bacillus amyloliquefaciens subsp. plantarum CAU B946]			191 aa protein
gi	498118792	ref	WP_010432948.1		4.9608e-09	35.7	GSCVPELKALF			945. nitrate reductase [Enterobacter mori]			YP_481047.1 GI	86740647
gi	154687026	ref	YP_001422187.1		4.86922e-09	50	LAGVPELAPYF			164. hypothetical protein RBAM_025980 [Bacillus amyloliquefaciens subsp. plantarum str. FZB42]
gi	493162927	ref	WP_006169367.1		4.77458e-09	35.7	STYAPELRGSF			782. iron transport protein A [Natrialba chahannaoensis]		86742735	63. IucA/IucC protein [Frankia sp. CcI3]
gi	389741267	gb	EIM82456.1		4.70448e-09	28.6	ASYAPEILEFW			527. hypothetical protein STEHIDRAFT_124570 [Stereum hirsutum FP-91666 SS1]			672 aa protein
gi	384209762	ref	YP_005595482.1		4.70314e-09	35.7	SSGAPELAEMY			509. spermidine/putrescine transport ATP-binding protein PotA [Brachyspira intermedia PWS/A]			YP_483135.1 GI	86742735
gi	389742710	gb	EIM83896.1		4.60998e-09	28.6	STLTPELALKW			528. hypothetical protein STEHIDRAFT_140892 [Stereum hirsutum FP-91666 SS1]
gi	379736620	ref	YP_005330126.1		4.5642e-09	42.9	AALYPEVPELW			500. transketolase [Blastococcus saxobsidens DD2]		89056307	64. twin-arginine translocation pathway signal [Jannaschia sp. CCS1]
gi	491663784	ref	WP_005520500.1		4.54915e-09	42.9	SSSKPEVGLAF			768. molecular chaperone DnaK [Corynebacterium matruchotii]			522 aa protein
gi	23450990	gb	AAN32628.1	AF378082_3	4.53603e-09	42.9	ATLSPEVPARW			31. xylulose kinase [Escherichia coli]			YP_511758.1 GI	89056307
gi	449544862	gb	EMD35834.1		4.53341e-09	35.7	RSYYPELLELF			625. hypothetical protein CERSUDRAFT_106524 [Ceriporiopsis subvermispora B]
gi	496413407	ref	WP_009122271.1		4.53341e-09	42.9	LAGYPELKEAF			901. hypothetical protein [Bacteroides clarus]		89894067	65. hypothetical protein DSY1321 [Desulfitobacterium hafniense Y51]
gi	494405921	ref	WP_007214306.1		4.45928e-09	35.7	STIVPEVKLLY			831. multidrug ABC transporter permease [Bacteroides cellulosilyticus]			289 aa protein
gi	470159397	ref	YP_007531326.1		4.39174e-09	50	VSFRPEVAQAF			649. xanthine/uracil permease [Corynebacterium callunae DSM 20147]			YP_517554.1 GI	89894067
gi	255530250	ref	YP_003090622.1		4.3655e-09	42.9	GAVRPEIRGKF			272. hypothetical protein Phep_0336 [Pedobacter heparinus DSM 2366]
gi	488825355	ref	WP_002737761.1		4.24328e-09	28.6	RTLKPELAERY			701. nucleotidyltransferase domain protein [Microcystis aeruginosa]		90423596	66. hypothetical protein RPC_2093 [Rhodopseudomonas palustris BisB18]
gi	493952489	ref	WP_006896320.1		4.23403e-09	35.7	ASVRPEVAEIW	ASFRPELAEFW	72.7	819. putative TetR family transcriptional regulator [Gordonia sihwensis]			210 aa protein
gi	495999310	ref	WP_008723889.1		4.18057e-09	42.9	SSGSPELGEMY			894. spermidine/putrescine transport ATP-binding protein PotA [Brachyspira hampsonii]			YP_531966.1 GI	90423596
gi	493030474	ref	WP_006099874.1		4.1499e-09	42.9	LSLSPEIGQVF	LSLRPEIPLVF	72.7	777. hypothetical protein [Coleofasciculus chthonoplastes]
gi	14600658	ref	NP_147176.1		4.14927e-09	35.7	ATLSPELREKY			16. 50S ribosomal protein L24 [Aeropyrum pernix K1]		91077836	67. PREDICTED	DNA helicase MCM9 [Tribolium castaneum]
gi	397605426	gb	EJK59007.1		4.14036e-09	50	KSFTPEIAQIF			549. hypothetical protein THAOC_20824, partial [Thalassiosira oceanica]			898 aa protein
gi	497506120	ref	WP_009820318.1		4.13424e-09	35.7	VSLVPEVRQSW						XP_971324.1 GI	91077836
gi	478484547	ref	YP_007752128.1		4.10093e-09	50	GSFSPELLGIF			673. hypothetical protein ECBG_00257 [Enterococcus casseliflavus EC20]
gi	397780855	ref	YP_006545328.1		4.00896e-09	35.7	ASLSPELRGKY			552. 50S ribosomal protein L24P [Methanoculleus bourgensis MS2]		91795067	68. ATP-binding region, ATPase-like protein [Shewanella denitrificans OS217]
gi	158425270	ref	YP_001526562.1		3.99368e-09	28.6	ATLAPELAERW			175. peptide transporter substrate-binding protein [Azorhizobium caulinodans ORS 571]			1120 aa protein
gi	308809790	ref	XP_003082204.1		3.9839e-09	50	KALAPEIRHVF			374. putative serine/threonine kinase (ISS) [Ostreococcus tauri]			YP_564718.1 GI	91795067
gi	344235591	gb	EGV91694.1		3.93205e-09	28.6	ETLTPELALYW			453. Condensin complex subunit 3 [Cricetulus griseus]
gi	410668268	ref	YP_006920639.1		3.92236e-09	28.6	ETLRPEIAESW	GTLRPEIREMW	72.7	584. sigma-54 specific transcriptional regulator [Thermacetogenium phaeum DSM 12270]		107023625	69. XRE family transcriptional regulator [Burkholderia cenocepacia AU 1054]
gi	495573910	ref	WP_008298489.1		3.91796e-09	57.1	KTFAPEVAMSF			877. ATP-dependent zinc metalloprotease FtsH 2 [Bhargavaea cecembensis]			228 aa protein
gi	494687451	ref	YP_007953025.1		3.87318e-09	35.7	ASSRPEVPERY			842. hypothetical protein L083_5035 [Actinoplanes sp. N902-109]			YP_621952.1 GI	107023625
gi	395332751	gb	EJF65129.1		3.82506e-09	35.7	ESVRPELAEVF			546. hypothetical protein DICSQDRAFT_98693 [Dichomitus squalens LYAD-421 SS1]
gi	449437092	ref	XP_004136326.1		3.80016e-09	28.6	GSLTPELKDKY			620. PREDICTED		107029180	70. ABC transporter related [Burkholderia cenocepacia AU 1054]
gi	291391427	ref	XP_002712447.1		3.77733e-09	50	AALSPELRGLF						624 aa protein
gi	334310583	ref	XP_001375919.2		3.71606e-09	28.6	SSSVPELPGFY						YP_626275.1 GI	107029180
gi	403176367	ref	XP_003335040.2		3.69785e-09	28.6	RTLTPEIKMKY			564. hypothetical protein PGTG_16647 [Puccinia graminis f. sp. tritici CRL 75-36-700-3]
gi	56461671	ref	YP_156952.1		3.69284e-09	35.7	ATSKPEIAEFF			49. disulfide isomerase [Idiomarina loihiensis L2TR]		108805551	71. hypothetical protein Rxyl_2761 [Rubrobacter xylanophilus DSM 9941]
gi	478511745	ref	XP_004430141.1		3.66388e-09	42.9	ATGHPEVPLVF			674. PREDICTED			179 aa protein
gi	489898239	ref	WP_003801681.1		3.65191e-09	42.9	EAIRPEIRQYF	GTIRPEIREYF	72.7	721. glutamate synthase [Alcaligenes faecalis]			YP_645488.1 GI	108805551
gi	495696890	ref	WP_008421469.1		3.65115e-09	35.7	GTYAPELRGSF			883. iron transport protein A [Natronococcus jeotgali]
gi	47525234	ref	YP_016331.1		3.60612e-09	42.9	KSSYPEIGERF			45. chromosomal replication initiation protein [Geobacter sulfurreducens PCA]		108807360	72. putative dehydrogenase [Yersinia pestis Antiqua]
gi	496145101	ref	WP_008869608.1		3.57178e-09	42.9	GSVSPELAGVF						303 aa protein
gi	496426694	ref	WP_009135541.1		3.5574e-09	28.6	LSGTPELKARW			903. peptidase M13 [Odoribacter laneus]			YP_651276.1 GI	108807360
gi	492209263	ref	WP_005777131.1		3.55285e-09	42.9	KTIRPELPAGF
gi	373809288	emb	CCC55909.1		3.46302e-09	35.7	LSGRPELAALF			481. O-methyltransferase [Streptomyces sp. CS40]		110005909	73. titin a [Danio rerio]
gi	119962132	ref	YP_946602.1		3.44182e-09	50	RTFAPEVPALF			96. two-component system response regulator [Arthrobacter aurescens TC1]			32757 aa protein
gi	493890513	ref	WP_006836548.1		3.43058e-09	50	YSFSPELAQYF			815. hypothetical protein [Bacillus sp. SG-1]			ABG48500.1 GI	110005909
gi	387893713	ref	YP_006324010.1		3.38089e-09	42.9	KTLSPELRLGY			520. GntR family transcriptional regulator [Pseudomonas fluorescens A506]
gi	433646753	ref	YP_007291755.1		3.37029e-09	42.9	VTVVPEVKDAF			609. acyl-CoA dehydrogenase [Mycobacterium smegmatis JS623]		110641854	74. 6-phospho-beta-glucosidase [Escherichia coli 536]
gi	410867854	ref	YP_006982465.1		3.34414e-09	35.7	GALTPEIAGAW			586. transport protein [Propionibacterium acidipropionici ATCC 4875]			450 aa protein
gi	334318494	ref	YP_004551053.1		3.2954e-09	50	KAGVPELPDGF			429. adenylate/guanylate cyclase [Sinorhizobium meliloti AK83]			Record removed.
gi	430742642	ref	YP_007201771.1		3.23827e-09	42.9	RTSAPEIPPRF			603. cytochrome c biogenesis factor [Singulisphaera acidiphila DSM 18658]			YP_669584.1 GI	110641854
gi	471886841	emb	CCO33236.1		3.21552e-09	28.6	VSLTPEIADKW			666. Structural maintenance of chromosomes protein 2 AltName
gi	404496646	ref	YP_006720752.1		3.16745e-09	42.9	KTLTPELKALF			569. hypothetical protein Gmet_1785 [Geobacter metallireducens GS-15]		111223509	75. zinc metalloendopeptidase [Frankia alni ACN14a]
gi	379710469	ref	YP_005265674.1		3.13632e-09	28.6	ESYRPELRLLY			498. putative gamma-polyglutamic acid synthase [Nocardia cyriacigeorgica GUH-2]			674 aa protein
gi	410931784	ref	XP_003979275.1		3.11123e-09	57.1	KAFRPEVLGVW	RAFVPEVRGVW	72.7	588. PREDICTED			YP_714303.1 GI	111223509
gi	491109405	ref	WP_004968486.1		3.08943e-09	35.7	RTYAPELRGSF			752. iron transport protein A [Haloferax denitrificans]
gi	159042221	ref	YP_001541473.1		3.07243e-09	42.9	LTGHPEVPPLW			176. glycoside hydrolase [Caldivirga maquilingensis IC-167]		114685510	76. PREDICTED	small G protein signaling modulator 1 isoform X5 [Pan troglodytes]
gi	170581054	ref	XP_001895519.1		2.96208e-09	28.6	YSYKPEIALKW			196. hypothetical protein [Brugia malayi]			1148 aa protein
gi	498435831	ref	WP_010741511.1		2.93847e-09	57.1	VTFSPEVLEAF			951. fructose-6-phosphate aldolase [Enterococcus malodoratus]			XP_001171406.1 GI	114685510
gi	494073612	ref	WP_007015669.1		2.91747e-09	28.6	GTSRPELADRW
gi	226357813	ref	YP_002787553.1		2.91602e-09	28.6	VTLAPELPGVW			256. N-acetylglucosamine-6-phosphate deacetylase [Deinococcus deserti VCD115]		115387042	77. predicted protein [Aspergillus terreus NIH2624]
gi	255705110	emb	CBA13345.1		2.9141e-09	42.9	SAFVPELRDKY			276. polyprotein [Cassava brown streak virus]			361 aa protein
gi	493876399	ref	WP_006822790.1		2.90822e-09	28.6	ESYKPELGEAW			814. GlcNAc-PI de-N-acetylase [Corynebacterium casei]			XP_001210062.1 GI	115387042
gi	119361821	gb	ABL66844.1		2.9022e-09	85.7	KAFSPEVLPMF			91. gag protein [Human immunodeficiency virus 1]
gi	166917908	gb	ABZ03807.1		2.9022e-09	85.7	KAFSPEVGPMF			190. gag protein, partial [Human immunodeficiency virus 1]		115401644	78. conserved hypothetical protein [Aspergillus terreus NIH2624]
gi	266472	sp	Q01584.1	LIPO_BUFMA	2.89595e-09	50	KTLSPELLDKF			2. RecName			278 aa protein
gi	494006178	ref	WP_006948661.1		2.89086e-09	42.9	SSFAPELPHSF			822. hypothetical protein [Prevotella marshii]			XP_001216410.1 GI	115401644
gi	504144099	ref	XP_004584480.1		2.8417e-09	28.6	GSSVPELPGFY			962. PREDICTED
gi	496489167	ref	WP_009197737.1		2.83968e-09	35.7	KSLKPEILDKY	NSLKPEILDYF	72.7			115446715	79. Os02g0557200 [Oryza sativa Japonica Group]
gi	167583568	ref	YP_001671758.1		2.7998e-09	35.7	LTIAPELLLYF			192. conserved hypothetical protein [Enterobacteria phage Phieco32]			678 aa protein
gi	148555782	ref	YP_001263364.1		2.78784e-09	35.7	ESISPELKLLW			143. hypothetical protein Swit_2874 [Sphingomonas wittichii RW1]			NP_001047137.1 GI	115446715
gi	4877322	emb	CAB43125.1		2.77695e-09	28.6	YSGKPEIRHFY			7. olfactory receptor, partial [Pelophylax esculentus]
gi	339323658	ref	YP_004682552.1		2.72803e-09	42.9	GAVVPEVPGVW	RAFVPEVRGVW	72.7	437. phenol metabolism protein [Cupriavidus necator N-1]		116192443	80. hypothetical protein CHGG_05939 [Chaetomium globosum CBS 148.51]
gi	18406092	ref	NP_565990.1		2.71398e-09	42.9	YTGSPEIPLGF			25. MEI2-like 2 protein [Arabidopsis thaliana]			297 aa protein
gi	242209799	ref	XP_002470745.1		2.66587e-09	35.7	VSIKPEVALLW			263. predicted protein [Postia placenta Mad-698-R]			XP_001222034.1 GI	116192443
gi	470179736	ref	YP_007565780.1		2.63088e-09	28.6	ESLAPELRDRY			652. hypothetical protein YM304_35280 [Ilumatobacter coccineus YM16-304]
gi	491615507	ref	WP_005473063.1		2.62134e-09	50	KTSSPEIADRF			764. cysteinyl-tRNA synthetase [Enterococcus saccharolyticus]		116192993	81. hypothetical protein CHGG_06214 [Chaetomium globosum CBS 148.51]
gi	470157826	ref	YP_007529755.1		2.60671e-09	35.7	ETGAPELREKF			648. 2-succinyl-5-enolpyruvyl-6-hydroxy-3-cyclohexene-1-carboxylate synthase [Corynebacterium callunae DSM 20147]			371 aa protein
gi	121613434	ref	YP_001001325.1		2.58773e-09	42.9	LSFTPEIAAKF			102. DNA topoisomerase I [Campylobacter jejuni subsp. jejuni 81-176]			XP_001222309.1 GI	116192993
gi	312115166	ref	YP_004012762.1		2.58712e-09	42.9	KALYPELADFW			381. hypothetical protein Rvan_2443 [Rhodomicrobium vannielii ATCC 17100]
gi	197106384	ref	YP_002131761.1		2.47798e-09	35.7	YTGRPEIGGRF			223. pass1-related protein [Phenylobacterium zucineum HLK1]		116327816	82. DNA methylase [Leptospira borgpetersenii serovar Hardjo-bovis str. L550]
gi	410912790	ref	XP_003969872.1		2.47623e-09	50	YTISPELPAMF			587. PREDICTED			383 aa protein
gi	123775	sp	P04215.1	HV02_HETFR	2.42189e-09	42.9	NAYAPEIKDRF			1. RecName			YP_797536.1 GI	116327816
gi	340377297	ref	XP_003387166.1		2.376e-09	35.7	LSVAPELRPSW			441. PREDICTED
gi	488542828	ref	XP_004462985.1		2.36477e-09	28.6	SSSTPELPDAY			694. PREDICTED		116669221	83. two component transcriptional regulator [Arthrobacter sp. FB24]
gi	498038638	ref	WP_010352794.1		2.3462e-09	50	SSFSPELLARF	SSFSPELRMRW	72.7				246 aa protein
gi	393240560	gb	EJD48086.1		2.30515e-09	28.6	ATLAPEIRDKY			544. hypothetical protein AURDEDRAFT_163053 [Auricularia delicata TFB-10046 SS5]			YP_830154.1 GI	116669221
gi	403264571	ref	XP_003924549.1		2.30515e-09	28.6	ASSVPELPGYY			566. PREDICTED
gi	491072103	ref	WP_004933726.1		2.28096e-09	28.6	RSVVPELKGAY	RSFVPELKPAF	72.7	750. glucosamine-fructose-6-phosphate aminotransferase [isomerizing] [Acinetobacter soli]		117616352	84. Erk5 [synthetic construct]
gi	402226254	gb	EJU06314.1		2.25878e-09	35.7	ATFRPEIKDGY			561. hypothetical protein DACRYDRAFT_19525 [Dacryopinax sp. DJM-731 SS1]			737 aa protein
gi	328861231	gb	EGG10335.1		2.25755e-09	50	SALSPELKEGF			412. hypothetical protein MELLADRAFT_94458 [Melampsora larici-populina 98AG31]			ABK42194.1 GI	117616352
gi	156389056	ref	XP_001634808.1		2.23653e-09	42.9	VSFAPEILLFF	RSFYPEIPLFF	72.7	168. predicted protein [Nematostella vectensis]
gi	495757839	ref	WP_008482418.1		2.22126e-09	42.9	SALSPELKDKW					118465463	85. AraC family transcriptional regulator [Mycobacterium avium 104]
gi	496401160	ref	WP_009110150.1		2.17197e-09	42.9	KTLAPELLDLF	KSLAPEVRDLF	72.7	900. transcriptional regulator [Desulfovibrio sp. U5L]			280 aa protein
gi	495436968	ref	WP_008161663.1		2.11559e-09	50	VAGSPELRERF			872. acyl-CoA dehydrogenase [Achromobacter arsenitoxydans]			YP_881901.1 GI	118465463
gi	345792467	ref	XP_851650.2		2.10643e-09	42.9	WTSSPEIRAVF	WTSHPEIRAYF	81.8
gi	406938164	gb	EKD71448.1		2.04384e-09	35.7	NTCVPEVALGW			575. hypothetical protein ACD_46C00181G0013 [uncultured bacterium]		118468525	86. serine/threonine protein kinase [Mycobacterium smegmatis str. MC2 155]
gi	110641854	ref	YP_669584.1		2.04347e-09	35.7	SSYTPELLEGF			74. 6-phospho-beta-glucosidase [Escherichia coli 536]			722 aa protein
gi	145226160	ref	YP_001136814.1		2.04019e-09	28.6	ATSVPEIRQRW			121. hypothetical protein Mflv_5565 [Mycobacterium gilvum PYR-GCK]			YP_889534.1 GI	118468525
gi	13541844	ref	NP_111532.1		2.0196e-09	28.6	SSSYPEIRQKW	SSFYPEIREYW	72.7	13. hypothetical protein TVN1013 [Thermoplasma volcanium GSS1]
gi	321473744	gb	EFX84711.1		2.01193e-09	50	NAGTPEILPYF			398. hypothetical protein DAPPUDRAFT_47063, partial [Daphnia pulex]		118489593	87. unknown [Populus trichocarpa x Populus deltoides]
gi	490081631	ref	WP_003983694.1		1.99584e-09	28.6	VSGTPELRGAY						343 aa protein
gi	9651280	gb	AAF91122.1	AF196675_1	1.99526e-09	78.6	RAFSPEVLPMF	RAFVPEVRMMF	72.7	9. gag protein, partial [Human immunodeficiency virus 1]			ABK96598.1 GI	118489593
gi	298713164	emb	CBJ26920.1		1.97219e-09	42.9	AALTPELRAMW			341. DEAD box helicase [Ectocarpus siliculosus]
gi	313676769	ref	YP_004054765.1		1.95938e-09	28.6	ATLKPELRAAY			384. group 1 glycosyl transferase [Marivirga tractuosa DSM 4126]		118618105	88. peptide synthetase Nrp (peptide synthase) [Mycobacterium ulcerans Agy99]
gi	66362344	ref	XP_628136.1		1.95888e-09	35.7	VSVTPELKDFF			52. hypothetical protein [Cryptosporidium parvum Iowa II]			3144 aa protein
gi	145483975	ref	XP_001428010.1		1.8779e-09	35.7	LTVTPEVRELY			126. hypothetical protein [Paramecium tetraurelia strain d4-2]			YP_906437.1 GI	118618105
gi	493593517	ref	WP_006546310.1		1.86624e-09	28.6	ASIYPELKDVY			803. AGCS family alanine or glycine
gi	495091383	ref	WP_007816206.1		1.85421e-09	28.6	GTLAPELAESW			857. peptide ABC transporter substrate-binding protein [Roseobacter sp. AzwK-3b]		119187369	89. predicted protein [Coccidioides immitis RS]
gi	126345443	ref	XP_001362482.1		1.83744e-09	42.9	ESSSPEVKGYW			114. PREDICTED			528 aa protein
gi	488123420	ref	WP_002194628.1		1.81387e-09	50	ETFVPEILPLF						XP_001244291.1 GI	119187369
gi	255548117	ref	XP_002515115.1		1.78538e-09	42.9	RALVPELKLSF			275. hypothetical protein RCOM_1341370 [Ricinus communis]
gi	465960295	gb	EMP28824.1		1.78398e-09	35.7	SSCVPELGLSF			645. CMP-N-acetylneuraminate-beta-galactosamide-alpha-2,3-sialyltransferase 1 [Chelonia mydas]		119357306	90. PilT domain-containing protein [Chlorobium phaeobacteroides DSM 266]
gi	491164943	ref	WP_005023315.1		1.73781e-09	42.9	EAYYPEIPEFF			756. MULTISPECIES			168 aa protein
gi	374295956	ref	YP_005046147.1		1.73687e-09	35.7	LTFTPEIGGYY			482. fibronectin type III domain-containing protein,CARDB domain-containing protein [ [[Clostridium] clariflavum DSM 19732]			YP_911950.1 GI	119357306
gi	493970608	ref	WP_006913784.1		1.71158e-09	35.7	ETLVPEVAESW			820. ABC transporter substrate-binding protein [Salinisphaera shabanensis]
gi	497920627	ref	WP_010234783.1		1.70502e-09	28.6	GTIRPELRALY					119361821	91. gag protein [Human immunodeficiency virus 1]
gi	303272803	ref	XP_003055763.1		1.65996e-09	35.7	VSLAPEILGAF			363. nucleobase			488 aa protein
gi	269122956	ref	YP_003305533.1		1.62156e-09	42.9	NTISPEVKMIY			294. hypothetical protein Smon_0167 [Streptobacillus moniliformis DSM 12112]			ABL66844.1 GI	119361821
gi	15643985	ref	NP_229034.1		1.60301e-09	35.7	KTSRPEIRQSW			20. hypothetical protein TM1229 [Thermotoga maritima MSB8]
gi	320354216	ref	YP_004195555.1		1.58372e-09	50	KTLSPEILARF			394. CoA-binding domain-containing protein [Desulfobulbus propionicus DSM 2032]		119387292	92. bifunctional aconitate hydratase 2/2-methylisocitrate dehydratase [Paracoccus denitrificans PD1222]
gi	225621275	ref	YP_002722533.1		1.56771e-09	35.7	SSGAPELGEMY			251. spermidine/putrescine transport ATP-binding protein PotA [Brachyspira hyodysenteriae WA1]			930 aa protein
gi	487404548	ref	WP_001672887.1		1.56265e-09	35.7	GSYTPELLEGF			689. 6-phospho-beta-glucosidase [Escherichia coli]			YP_918326.1 GI	119387292
gi	495991303	ref	WP_008715882.1		1.55836e-09	35.7	RSVRPELGEGF			893. hypothetical protein [Rhodococcus sp. AW25M09]
gi	452989300	gb	EME89055.1		1.54612e-09	42.9	GAVKPEIRAFF			634. hypothetical protein MYCFIDRAFT_185494 [Pseudocercospora fijiensis CIRAD86]		119483526	93. hypothetical protein NFIA_093890 [Neosartorya fischeri NRRL 181]
gi	449455655	ref	XP_004145567.1		1.53454e-09	42.9	GALVPEILDIF			621. PREDICTED			1486 aa protein
gi	451943527	ref	YP_007464163.1		1.53014e-09	35.7	LTGHPEVRDRY			629. hypothetical protein A605_03950 [Corynebacterium halotolerans YIM 70093 = DSM 44683]			XP_001261666.1 GI	119483526
gi	490655719	ref	WP_004520709.1		1.52716e-09	35.7	ETLAPEIAGAF			744. head morphogenesis protein [Neisseria subflava]
gi	325298906	ref	YP_004258823.1		1.52468e-09	35.7	ETFYPEIAEIW			407. hypothetical protein [Bacteroides salanitronis DSM 18170]		119499525	94. MFS transporter, putative [Neosartorya fischeri NRRL 181]
gi	492544469	ref	WP_005880807.1		1.52163e-09	35.7	ESYRPEIGHYF			772. transcriptional regulator [Oxalobacter formigenes]			552 aa protein
gi	378733172	gb	EHY59631.1		1.52131e-09	42.9	GTCSPEIAGKF			497. hypothetical protein HMPREF1120_07616 [Exophiala dermatitidis NIH/UT8656]			XP_001266520.1 GI	119499525
gi	497828087	ref	WP_010142243.1		1.51419e-09	64.3	EAFSPEVRDIF			933. restriction endonuclease subunit M [Oceanicola sp. S124]
gi	496672679	ref	WP_009315169.1		1.50543e-09	50	VAGSPEVRELW			912. hypothetical protein [Streptomyces ipomoeae]		119715893	95. glutamate dehydrogenase [Nocardioides sp. JS614]
gi	469401830	emb	CCO27484.1		1.50336e-09	35.7	ASIVPELLPYY			646. apocytochrome b (mitochondrion) [Rhizoctonia solani AG-1 IB]			458 aa protein
gi	489899091	ref	WP_003802531.1		1.50336e-09	35.7	ESLVPEVKDIY			722. succinate dehydrogenase flavoprotein subunit [Alcaligenes faecalis]			YP_922858.1 GI	119715893
gi	300312905	ref	YP_003776997.1		1.46076e-09	42.9	EAIRPELRQYF			346. glutamate synthase [Herbaspirillum seropedicae SmR1]
gi	495150311	ref	WP_007875117.1		1.45962e-09	35.7	SSIAPEIGQAF			860. multi-sensor signal transduction histidine kinase [Ochrobactrum sp. CDB2]		119962132	96. two-component system response regulator [Arthrobacter aurescens TC1]
gi	328789915	ref	XP_001120679.2		1.45152e-09	28.6	YSITPELRDIY			411. PREDICTED			246 aa protein
gi	491652769	ref	WP_005509490.1		1.44926e-09	28.6	GTVKPELAEKW			767. ABC transporter substrate-binding protein [Corynebacterium amycolatum]			YP_946602.1 GI	119962132
gi	197244382	emb	CAQ64687.1		1.44062e-09	50	GAGVPEVALLF			225. lasalocid modular polyketide synthase [Streptomyces lasaliensis]
gi	470427614	ref	XP_004338010.1		1.44062e-09	57.1	GAGSPEVALAF			654. phosphate ABC transporter, phosphatebinding protein PstS, putative [Acanthamoeba castellanii str. Neff]		119963295	97. L-threonine 3-dehydrogenase [Arthrobacter aurescens TC1]
gi	491546951	ref	WP_005404566.1		1.42184e-09	42.9	EAYYPEIPEVF			762. MULTISPECIES			348 aa protein
gi	32475007	ref	NP_868001.1		1.41926e-09	35.7	WAITPEIRGSW			36. serine protease homologue- secreted serine protease [Rhodopirellula baltica SH 1]			YP_947233.1 GI	119963295
gi	269123994	ref	YP_003306571.1		1.41886e-09	35.7	NTITPEVKMKY			295. hypothetical protein Smon_1240 [Streptobacillus moniliformis DSM 12112]
gi	217969721	ref	YP_002354955.1		1.4165e-09	50	KALHPELRMSF			236. LysR family transcriptional regulator [Thauera sp. MZ1T]		120404014	98. dienelactone hydrolase [Mycobacterium vanbaalenii PYR-1]
gi	496482579	ref	WP_009191149.1		1.4165e-09	50	AALSPELRAAF			907. SyrP [Streptomyces sp. e14]			318 aa protein
gi	334313341	ref	XP_001379500.2		1.41372e-09	42.9	NSITPEVLPGW						YP_953843.1 GI	120404014
gi	350525752	ref	YP_004885390.1		1.40429e-09	35.7	WTSAPEIKGAF			463. hypothetical protein [Thermococcus sp. AM4]
gi	73537584	ref	YP_297951.1		1.39696e-09	42.9	GAGVPELLDAF			57. elongation factor G [Ralstonia eutropha JMP134]		120437325	99. alpha-glucosidase [Gramella forsetii KT0803]
gi	495321274	ref	WP_008046020.1		1.3833e-09	35.7	LSLVPEIGHGF	RSFVPEIGMGF	72.7	865. alpha-galactosidase [Reinekea blandensis]			799 aa protein
gi	497543731	ref	WP_009857929.1		1.37998e-09	35.7	AAGRPELRLAY						YP_863011.1 GI	120437325
gi	489763997	ref	WP_003667932.1		1.33018e-09	35.7	NTITPEIAPVY			718. hypothetical protein [Moraxella catarrhalis]
gi	158425029	ref	YP_001526321.1		1.32797e-09	42.9	LALAPELRQAF			174. flavin-containing protein [Azorhizobium caulinodans ORS 571]		120437497	100. patatin-like phospholipase [Gramella forsetii KT0803]
gi	449541497	gb	EMD32481.1		1.30062e-09	35.7	NTGAPEVKDRY			624. hypothetical protein CERSUDRAFT_58620 [Ceriporiopsis subvermispora B]			742 aa protein
gi	148822966	ref	YP_001287720.1		1.29356e-09	57.1	KALSPEVLLAW			148. hypothetical protein TBFG_11777 [Mycobacterium tuberculosis F11]			YP_863183.1 GI	120437497
gi	429221043	ref	YP_007182687.1		1.28621e-09	35.7	ASLTPEVLDGW			597. DNA repair ATPase [Deinococcus peraridilitoris DSM 19664]
gi	319791604	ref	YP_004153244.1		1.2779e-09	50	GTVSPEVLMRF			390. RNA-binding s4 domain-containing protein [Variovorax paradoxus EPS]		120596912	101. hypothetical protein Sputw3181_0079 [Shewanella sp. W3-18-1]
gi	262197731	ref	YP_003268940.1		1.26839e-09	50	GALAPELPHMF			291. aldehyde dehydrogenase [Haliangium ochraceum DSM 14365]			244 aa protein
gi	410971773	ref	XP_003992339.1		1.26386e-09	42.9	ETIAPEVRDSF			589. PREDICTED			YP_961486.1 GI	120596912
gi	389865267	ref	YP_006367508.1		1.25909e-09	35.7	AAIYPELPELW			530. transketolase [Modestobacter marinus]
gi	321456030	gb	EFX67148.1		1.24555e-09	42.9	EALKPEVALYW			397. hypothetical protein DAPPUDRAFT_189551 [Daphnia pulex]		121613434	102. DNA topoisomerase I [Campylobacter jejuni subsp. jejuni 81-176]
gi	344200901	ref	YP_004785227.1		1.24478e-09	42.9	WALSPELPEVY			451. leucine-rich repeat-containing protein [Acidithiobacillus ferrivorans SS3]			700 aa protein
gi	389747190	gb	EIM88369.1		1.23343e-09	50	STFSPELAHLF			529. DEAD-domain-containing protein [Stereum hirsutum FP-91666 SS1]			YP_001001325.1 GI	121613434
gi	402908612	ref	XP_003917030.1		1.22763e-09	50	GALSPELADLF
gi	472342299	ref	YP_007675808.1		1.2173e-09	35.7	RSLYPELLGSF			667. virion RNA polymerase [Sulfitobacter phage phiCB2047-B]		121710972	103. fatty acid synthase subunit alpha, putative [Aspergillus clavatus NRRL 1]
gi	161504078	ref	YP_001571190.1		1.21094e-09	35.7	SSYTPELLDGF			186. hypothetical protein SARI_02171 [Salmonella enterica subsp. arizonae serovar 62			1631 aa protein
gi	294678175	ref	YP_003578790.1		1.18296e-09	50	LSFSPELAAIF	LSGSPELRMIF	72.7	319. glycerol kinase [Rhodobacter capsulatus SB 1003]			XP_001273102.1 GI	121710972
gi	83310199	ref	YP_420463.1		1.17141e-09	42.9	GTGTPEVGGLF			59. arginase/agmatinase/formimionoglutamate hydrolase [Magnetospirillum magneticum AMB-1]
gi	389634287	ref	XP_003714796.1		1.1677e-09	35.7	SSSVPELAAAF	SSGVPELKPAF	72.7	526. acyl-CoA desaturase [Magnaporthe oryzae 70-15]		123480697	104. hypothetical protein [Trichomonas vaginalis G3]
gi	495404614	ref	WP_008129313.1		1.14684e-09	35.7	WTVTPELRARF			870. TonB-denpendent receptor [Pseudoalteromonas sp. BSi20480]			250 aa protein
gi	498095730	ref	WP_010409886.1		1.14175e-09	42.9	SAVRPELRGSF						XP_001323384.1 GI	123480697
gi	495661559	ref	WP_008386138.1		1.12343e-09	35.7	ATYAPELRGSF			881. iron transport protein A [Halosarcina pallida]
gi	489840706	ref	WP_003744409.1		1.12211e-09	28.6	YTGTPELRGFY			720. NnrS protein [Neisseria mucosa]		123483718	105. hypothetical protein [Trichomonas vaginalis G3]
gi	183220643	ref	YP_001838639.1		1.1219e-09	35.7	ESITPELLMRF			203. hypothetical protein LEPBI_I1251 [Leptospira biflexa serovar Patoc strain 'Patoc 1 (Paris)']			410 aa protein
gi	494474626	ref	WP_007264104.1		1.11407e-09	35.7	STYTPELADGF			833. 6-phospho-beta-glucosidase [Streptomyces sp. C]			XP_001324088.1 GI	123483718
gi	399218880	emb	CCF75767.1		1.10849e-09	28.6	SSIAPEIPQRY			555. unnamed protein product [Babesia microti strain RI]
gi	428226858	ref	YP_007110955.1		1.05822e-09	35.7	SSLAPELGQVF			595. hypothetical protein GEI7407_3436 [Geitlerinema sp. PCC 7407]		123490404	106. hypothetical protein [Trichomonas vaginalis G3]
gi	401408111	ref	XP_003883504.1		1.05322e-09	64.3	AACSPEVPPVF			556. conserved hypothetical protein [Neospora caninum Liverpool]			730 aa protein
gi	297829822	ref	XP_002882793.1		1.05152e-09	64.3	YAFSPEIKPLF			338. hypothetical protein ARALYDRAFT_478650 [Arabidopsis lyrata subsp. lyrata]			XP_001325602.1 GI	123490404
gi	495341677	ref	WP_008066411.1		1.05093e-09	50	SACSPELAEVF			867. disulfide bond formation protein DsbB [Pseudomonas sp. GM78]
gi	471407037	ref	XP_004385112.1		1.03286e-09	50	LALVPELGPRF			661. PREDICTED		124267208	107. hypothetical protein Mpe_A2019 [Methylibium petroleiphilum PM1]
gi	148262086	ref	YP_001228792.1		1.03032e-09	42.9	KSSYPEIGEKF			140. chromosomal replication initiation protein [Geobacter uraniireducens Rf4]			161 aa protein
gi	356515440	ref	XP_003526408.1		1.02981e-09	35.7	RTSVPELKDGF	RTFVPELKPAF	72.7				YP_001021212.1 GI	124267208
gi	407649031	ref	YP_006812790.1		1.02449e-09	42.9	SAFVPEIKESY			576. lipase [Nocardia brasiliensis ATCC 700358]
gi	110005909	gb	ABG48500.1		1.0164e-09	35.7	VSGTPELKPKW			73. titin a [Danio rerio]		125531159	108. hypothetical protein OsI_32765 [Oryza sativa Indica Group]
gi	297572203	ref	YP_003697977.1		1.0101e-09	50	VTFRPEVAQVF			335. xanthine permease [Arcanobacterium haemolyticum DSM 20595]			172 aa protein
gi	452855496	ref	YP_007497179.1		1.00407e-09	35.7	GTVRPELAGKF			632. Aspartate carbamoyltransferase [Bacillus amyloliquefaciens subsp. plantarum UCMB5036]			EAY77724.1 GI	125531159
gi	493406700	ref	WP_006362741.1		1.00407e-09	35.7	GTVYPELAGFF			793. DNA-binding response regulator, LuxR family [Slackia exigua]
gi	307154004	ref	YP_003889388.1		9.93353e-10	35.7	NSVTPEIAHRF			368. Carbohydrate kinase, FGGY-like protein [Cyanothece sp. PCC 7822]		125545259	109. hypothetical protein OsI_13022 [Oryza sativa Indica Group]
gi	494352085	ref	WP_007191402.1		9.91683e-10	35.7	RSVTPELAESF			830. HtrA2 peptidase [Thiocapsa marina]			649 aa protein
gi	126179695	ref	YP_001047660.1		9.83002e-10	42.9	WAVTPEIPGVF			112. hypothetical protein Memar_1752 [Methanoculleus marisnigri JR1]			EAY91398.1 GI	125545259
gi	489220820	ref	WP_003129274.1		9.83002e-10	42.9	KTSAPEIADRF			708. cysteinyl-tRNA synthetase [Enterococcus gallinarum]
gi	496746769	ref	WP_009360345.1		9.83002e-10	42.9	LTSVPEVGDRF					125599668	110. hypothetical protein OsJ_23668 [Oryza sativa Japonica Group]
gi	19704333	ref	NP_603895.1		9.66654e-10	28.6	GSIKPELAESY			28. dipeptide-binding protein [Fusobacterium nucleatum subsp. nucleatum ATCC 25586]			435 aa protein
gi	367046472	ref	XP_003653616.1		9.50334e-10	28.6	SSGTPELLQFW			480. hypothetical protein THITE_2116178 [Thielavia terrestris NRRL 8126]			EAZ39244.1 GI	125599668
gi	379746937	ref	YP_005337758.1		9.40896e-10	35.7	ASVRPEVAHAW			501. AraC family transcriptional regulator [Mycobacterium intracellulare ATCC 13950]
gi	322696020	gb	EFY87819.1		9.33728e-10	35.7	YSSAPEILEYF			403. putative steroid monooxygenase [Metarhizium acridum CQMa 102]		126178525	111. 50S ribosomal protein L24 [Methanoculleus marisnigri JR1]
gi	290473243	ref	YP_003466108.1		9.3312e-10	42.9	KSISPEILEKY			313. LysR family transcriptional regulator [Xenorhabdus bovienii SS-2004]			121 aa protein
gi	449502397	ref	XP_002199264.2		9.29016e-10	28.6	NSVAPELPGFY			623. PREDICTED			YP_001046490.1 GI	126178525
gi	297172686	gb	ADI23653.1		9.27288e-10	50	LAVHPEVREVF			332. lysyl-tRNA synthetase (class II) [uncultured Gemmatimonadales bacterium HF4000_15H13]
gi	308801525	ref	XP_003078076.1		9.1476e-10	28.6	RSSTPELRLLY			373. DNA helicase isolog (ISS) [Ostreococcus tauri]		126179695	112. hypothetical protein Memar_1752 [Methanoculleus marisnigri JR1]
gi	150004561	ref	YP_001299305.1		9.03514e-10	35.7	ETFYPEIADIW			151. hypothetical protein BVU_2016 [Bacteroides vulgatus ATCC 8482]			538 aa protein
gi	488639902	ref	WP_002576560.1		8.92944e-10	42.9	GSVSPELGEIF			697. M3 family oligoendopeptidase [[Clostridium] bolteae]			YP_001047660.1 GI	126179695
gi	390949284	ref	YP_006413043.1		8.88096e-10	35.7	LALAPEIGGYW			533. putative O-linked N-acetylglucosamine transferase, SPINDLY family [Thiocystis violascens DSM 198]
gi	283778843	ref	YP_003369598.1		8.87086e-10	42.9	KTFVPELLEKY			304. acriflavin resistance protein [Pirellula staleyi DSM 6068]		126207722	113. lipoprotein [Actinobacillus pleuropneumoniae serovar 5b str. L20]
gi	402226440	gb	EJU06500.1		8.7768e-10	50	KSSAPELPPSF	KSFVPELKPSF	72.7	562. hypothetical protein DACRYDRAFT_113194 [Dacryopinax sp. DJM-731 SS1]			196 aa protein
gi	296209408	ref	XP_002751519.1		8.74368e-10	28.6	ASSVPELPGFY						YP_001052947.1 GI	126207722
gi	255986448	gb	ACU50607.1		8.70659e-10	78.6	KAFSPEVXXMF			278. gag protein [Human immunodeficiency virus 1]
gi	505846264	ref	XP_004616608.1		8.54792e-10	35.7	EALTPEIALYW			964. PREDICTED		126345443	114. PREDICTED	poly(rC)-binding protein 2-like isoform X1 [Monodelphis domestica]
gi	221632843	ref	YP_002522065.1		8.54784e-10	50	AAISPEIRQRF			244. methylthioadenosine phosphorylase [Thermomicrobium roseum DSM 5159]			351 aa protein
gi	497930489	ref	WP_010244645.1		8.50014e-10	42.9	RSIYPEVGAVF			939. MULTISPECIES			XP_001362482.1 GI	126345443
gi	339500257	ref	YP_004698292.1		8.30362e-10	42.9	LAIKPELADLF			439. hypothetical protein Spica_1641 [Treponema caldaria DSM 7334]
gi	392584814	gb	EIW74157.1		8.29855e-10	50	KALVPELLEMY			542. hypothetical protein CONPUDRAFT_78300 [Coniophora puteana RWD-64-598 SS2]		126348131	115. putative oxidoreductase [Streptomyces ambofaciens ATCC 23877]
gi	119715893	ref	YP_922858.1		8.16408e-10	50	SALHPELRPMY			95. glutamate dehydrogenase [Nocardioides sp. JS614]			363 aa protein
gi	495187794	ref	WP_007912584.1		8.0571e-10	35.7	STYAPELAESF			863. MULTISPECIES			CAJ89852.1 GI	126348131
gi	107023625	ref	YP_621952.1		7.82074e-10	50	VTVSPEVPPRW			69. XRE family transcriptional regulator [Burkholderia cenocepacia AU 1054]
gi	212527022	ref	XP_002143668.1		7.623e-10	28.6	RSVAPEIKARW			234. galactokinase [Talaromyces marneffei ATCC 18224]		126462719	116. class III aminotransferase [Rhodobacter sphaeroides ATCC 17029]
gi	488629934	ref	WP_002566623.1		7.61076e-10	42.9	LALHPEVREVY			696. hypothetical protein [[Clostridium] bolteae]			436 aa protein
gi	495475001	ref	WP_008199688.1		7.5888e-10	42.9	SSFSPELKALY			873. hypothetical protein [Algoriphagus machipongonensis]			YP_001043833.1 GI	126462719
gi	159468790	ref	XP_001692557.1		7.58316e-10	71.4	KASSPEVAEMF			178. copper response defect 1 protein [Chlamydomonas reinhardtii]
gi	299746676	ref	XP_001840548.2		7.5168e-10	35.7	LSLVPEVLDGY			343. hypothetical protein CC1G_12821 [Coprinopsis cinerea okayama7#130]		127514606	117. hypothetical protein Shew_3678 [Shewanella loihica PV-4]
gi	471560445	gb	EMR62565.1		7.48954e-10	50	WTSSPEVKDIF			662. putative fad binding domain-containing protein [Eutypa lata UCREL1]			251 aa protein
gi	494576288	ref	WP_007341661.1		7.43424e-10	42.9	YAGSPEIKMLW						YP_001095803.1 GI	127514606
gi	126207722	ref	YP_001052947.1		7.40177e-10	57.1	LTSSPEVGLMF			113. lipoprotein [Actinobacillus pleuropneumoniae serovar 5b str. L20]
gi	498172415	ref	WP_010486571.1		7.38778e-10	42.9	LAYRPELLLAF			946. hypothetical protein [Stenotrophomonas maltophilia]		134058748	118. unnamed protein product [Aspergillus niger]
gi	497870821	ref	WP_010184977.1		7.3458e-10	35.7	YSGAPEIGGRF			936. cupin [Sphingomonas sp. PAMC 26605]			447 aa protein
gi	310823270	ref	YP_003955628.1		7.30382e-10	42.9	RALHPELKELF			377. oxidoreductase nad-binding domain-containing protein [Stigmatella aurantiaca DW4/3-1]			CAK38732.1 GI	134058748
gi	386849277	ref	YP_006267290.1		7.10921e-10	42.9	VTVYPEVREGF			516. hypothetical protein ACPL_4331 [Actinoplanes sp. SE50/110]
gi	108807360	ref	YP_651276.1		7.10899e-10	35.7	AAIKPELRLFY			72. putative dehydrogenase [Yersinia pestis Antiqua]		134093603	119. glutamate synthase [Herminiimonas arsenicoxydans]
gi	300716726	ref	YP_003741529.1		7.09632e-10	28.6	ASVTPELLDAW			348. AraC family transcriptional regulator [Erwinia billingiae Eb661]			542 aa protein
gi	430750667	ref	YP_007213575.1		7.06621e-10	57.1	AAFSPELADRF			606. urease accessory protein UreG [Thermobacillus composti KWC4]			YP_001098678.1 GI	134093603
gi	397772941	ref	YP_006540487.1		7.05672e-10	35.7	LAGRPELREGY			551. multi-sensor signal transduction histidine kinase [Natrinema sp. J7-2]
gi	374996051	ref	YP_004971550.1		7.05483e-10	35.7	NSLYPELAHSF			485. molybdate ABC transporter periplasmic protein [Desulfosporosinus orientis DSM 765]		145223898	120. dienelactone hydrolase [Mycobacterium gilvum PYR-GCK]
gi	299742020	ref	XP_002910514.1		7.02144e-10	50	ATISPEIAPGF			342. hypothetical protein CC1G_15153 [Coprinopsis cinerea okayama7#130]			305 aa protein
gi	170782101	ref	YP_001710434.1		6.95123e-10	50	AAGVPEVPAVF			199. hypothetical protein CMS_1726 [Clavibacter michiganensis subsp. sepedonicus]			YP_001134576.1 GI	145223898
gi	496106957	ref	WP_008831464.1		6.87203e-10	42.9	RALKPEVADSW
gi	166408944	emb	CAP74387.1		6.85978e-10	35.7	AALTPEILDAW			189. flavohemoglobin [Botrytis cinerea]		145226160	121. hypothetical protein Mflv_5565 [Mycobacterium gilvum PYR-GCK]
gi	377806201	gb	AFB75907.1		6.85125e-10	28.6	LSLAPEIKARY			492. hypothetical protein 2203_scaffold802_00041 [unidentified phage]			322 aa protein
gi	493149734	ref	WP_006161725.1		6.80011e-10	50	LAVRPEVLEAF			780. 4-aminobutyrate aminotransferase [Cupriavidus basilensis]			YP_001136814.1 GI	145226160
gi	497885049	ref	WP_010199205.1		6.63984e-10	42.9	EAIYPEIRQYF			937. hypothetical protein [Bacillus sp. m3-13]
gi	492353419	ref	WP_005818789.1		6.5826e-10	57.1	LSSSPEVAQMF			770. hypothetical protein [Actinobacillus minor]		145294308	122. hypothetical protein cgR_0263 [Corynebacterium glutamicum R]
gi	379711688	ref	YP_005266893.1		6.56829e-10	42.9	NSIAPEVLAVF			499. putative transcriptional regulator [Nocardia cyriacigeorgica GUH-2]			1510 aa protein
gi	146311021	ref	YP_001176095.1		6.54126e-10	35.7	SSGHPELGLLF			131. inner membrane protein [Enterobacter sp. 638]			YP_001137129.1 GI	145294308
gi	153947735	ref	YP_001401076.1		6.46272e-10	42.9	AAIKPELRPFY			159. NAD dependent epimerase/dehydratase family protein [Yersinia pseudotuberculosis IP 31758]
gi	496055873	ref	WP_008780380.1		6.38928e-10	35.7	SSLYPEVGDKY					145299407	123. type VI secretion system clpB chaperone [Aeromonas salmonicida subsp. salmonicida A449]
gi	491304662	ref	WP_005162665.1		6.34677e-10	42.9	WAGYPELAERF						880 aa protein
gi	154315441	ref	XP_001557043.1		6.31826e-10	35.7	SSSKPEILLGF			160. hypothetical protein BC1G_04293 [Botrytis cinerea B05.10]			YP_001142248.1 GI	145299407
gi	486616550	ref	WP_001618784.1		6.29545e-10	35.7	KTGVPELLELY			688. hypothetical protein [Escherichia coli]
gi	298291971	ref	YP_003693910.1		6.17026e-10	35.7	LTVAPEVPMVY	LTFVPEVAMVY	72.7	339. multi-sensor hybrid histidine kinase [Starkeya novella DSM 506]		145348171	124. P-ATPase family transporter	phospholipid [Ostreococcus lucimarinus CCE9901]
gi	332661787	ref	YP_004451257.1		6.08652e-10	42.9	LALHPELKLVF			421. hypothetical protein Halhy_6568 [Haliscomenobacter hydrossis DSM 1100]			1242 aa protein
gi	15835055	ref	NP_296814.1		6.05947e-10	50	RALSPELLDRF			23. adherence factor [Chlamydia muridarum str. Nigg]			XP_001418529.1 GI	145348171
gi	406876309	gb	EKD25907.1		6.0331e-10	50	LAFKPELLEIF	YSFKPELKEIF	72.7	573. hypothetical protein ACD_79C01446G0004 [uncultured bacterium]
gi	384541256	ref	YP_005725339.1		5.99163e-10	50	KAVVPELPDGF			512. hypothetical protein SM11_pC1457 [Sinorhizobium meliloti SM11]		145349544	125. predicted protein [Ostreococcus lucimarinus CCE9901]
gi	495494879	ref	WP_008219538.1		5.99163e-10	57.1	KAYSPELPAAF			874. TonB-dependent receptor [Rheinheimera nanhaiensis]			510 aa protein
gi	495328072	ref	WP_008052814.1		5.90208e-10	57.1	AALSPEIAPLF			866. hypothetical protein [Pseudomonas sp. GM74]			XP_001419191.1 GI	145349544
gi	498316346	ref	WP_010630502.1		5.72314e-10	35.7	LAYVPELPELY			949. multidrug ABC transporter ATP-binding protein [Sporolactobacillus vineae]
gi	146343420	ref	YP_001208468.1		5.70525e-10	28.6	ATLAPELAESW			133. ABC transporter substrate-binding protein [Bradyrhizobium sp. ORS 278]		145483975	126. hypothetical protein [Paramecium tetraurelia strain d4-2]
gi	383772540	ref	YP_005451606.1		5.666e-10	57.1	AALSPEVGDAF			506. transcriptional regulator [Bradyrhizobium sp. S23321]			116 aa protein
gi	189218644	ref	YP_001939285.1		5.55315e-10	42.9	KALKPEILGKW			215. hypothetical protein Minf_0632 [Methylacidiphilum infernorum V4]			XP_001428010.1 GI	145483975
gi	18978217	ref	NP_579574.1		5.51844e-10	42.9	NALAPELLDFF			26. murein hydrolase [Pyrococcus furiosus DSM 3638]
gi	296415598	ref	XP_002837473.1		5.50935e-10	35.7	LSSRPELAQRF			331. hypothetical protein [Tuber melanosporum Mel28]		145592581	127. valyl-tRNA synthetase [Salinispora tropica CNB-440]
gi	119387292	ref	YP_918326.1		5.49504e-10	50	EAIVPEIAPAF			92. bifunctional aconitate hydratase 2/2-methylisocitrate dehydratase [Paracoccus denitrificans PD1222]			860 aa protein
gi	397669923	ref	YP_006511458.1		5.39115e-10	42.9	GTVAPEVLERF			550. dihydrodipicolinate synthase [Propionibacterium propionicum F0230a]			YP_001156878.1 GI	145592581
gi	15597602	ref	NP_251096.1		5.35194e-10	42.9	VSGKPEVAGSF			17. hypothetical protein PA2406 [Pseudomonas aeruginosa PAO1]
gi	25027608	ref	NP_737662.1		5.13216e-10	28.6	ESYAPELGEAW			33. hypothetical protein CE1052 [Corynebacterium efficiens YS-314]		145595673	128. sigma-70 region 4 domain-containing protein [Salinispora tropica CNB-440]
gi	443917509	gb	ELU38210.1		5.05693e-10	42.9	GTSSPEVAEYY			613. O-FucT domain-containing protein [Rhizoctonia solani AG-1 IA]			188 aa protein
gi	392572988	gb	EIW66130.1		5.0094e-10	35.7	RSSSPEIPLIY			541. hypothetical protein TREMEDRAFT_65723 [Tremella mesenterica DSM 1558]			YP_001159970.1 GI	145595673
gi	498448661	ref	WP_010754204.1		4.97988e-10	42.9	AALAPEIKESF			952. hypothetical protein [Enterococcus asini]
gi	116192443	ref	XP_001222034.1		4.97401e-10	35.7	VSLRPEVGLRY			80. hypothetical protein CHGG_05939 [Chaetomium globosum CBS 148.51]		146300496	129. alpha-glucosidase [Flavobacterium johnsoniae UW101]
gi	307102957	gb	EFN51222.1		4.95475e-10	35.7	STISPEILGFY			367. hypothetical protein CHLNCDRAFT_55239 [Chlorella variabilis]			799 aa protein
gi	336275413	ref	XP_003352459.1		4.94208e-10	28.6	GSVAPELLGAW			433. hypothetical protein SMAC_01293 [Sordaria macrospora k-hell]			YP_001195087.1 GI	146300496
gi	495561983	ref	WP_008286562.1		4.92518e-10	50	RAGSPEILGAF
gi	489292123	ref	WP_003199654.1		4.88448e-10	42.9	AAVAPEIRDLF			712. primosomal protein N' [Bacillus mycoides]		146302015	130. short-chain dehydrogenase/reductase SDR [Flavobacterium johnsoniae UW101]
gi	492390499	ref	WP_005829148.1		4.86922e-10	42.9	LAGVPELAAYF			771. hypothetical protein [Brevibacillus agri]			241 aa protein
gi	493632732	ref	WP_006584603.1		4.79909e-10	35.7	KTVTPEIPEGY						YP_001196606.1 GI	146302015
gi	260841216	ref	XP_002613824.1		4.7488e-10	42.9	LAVTPEIKDLF			288. hypothetical protein BRAFLDRAFT_168499, partial [Branchiostoma floridae]
gi	495503911	ref	WP_008228564.1		4.72159e-10	28.6	ETIVPELAESW			875. ABC transporter substrate-binding protein [Roseobacter sp. GAI101]		146311021	131. inner membrane protein [Enterobacter sp. 638]
gi	440288336	ref	YP_007341101.1		4.61736e-10	35.7	ASGAPELGLLF			612. Putative inner membrane protein of Enterobacteriaceae [Enterobacteriaceae bacterium strain FGI 57]			128 aa protein
gi	340513883	gb	EGR44159.1		4.56192e-10	35.7	WSISPELALLY			442. predicted protein [Trichoderma reesei QM6a]			YP_001176095.1 GI	146311021
gi	497202498	ref	WP_009516760.1		4.5163e-10	35.7	RAIYPELLEAW			919. MULTISPECIES
gi	312135707	ref	YP_004003045.1		4.488e-10	28.6	LSSKPEILGKW			382. glycoside hydrolase family 4 [Caldicellulosiruptor owensensis OL]		146313021	132. hypothetical protein Ent638_3384 [Enterobacter sp. 638]
gi	320449758	ref	YP_004201854.1		4.46498e-10	50	EALSPEVAEVW			395. polyphosphate kinase [Thermus scotoductus SA-01]			281 aa protein
gi	300121547	emb	CBK22066.2		4.39263e-10	28.6	SSLAPELALKY			345. unnamed protein product [Blastocystis hominis]			YP_001178095.1 GI	146313021
gi	158318917	ref	YP_001511425.1		4.36234e-10	35.7	SAVAPEIAEAW			173. AraC family transcriptional regulator [Frankia sp. EAN1pec]
gi	300858141	ref	YP_003783124.1		4.30848e-10	28.6	ASYKPELGAAW			352. mycothiol conjugate amidase [Corynebacterium pseudotuberculosis FRC41]		146343420	133. ABC transporter substrate-binding protein [Bradyrhizobium sp. ORS 278]
gi	492588799	ref	WP_005896856.1		4.18504e-10	28.6	GTIVPELAESY			773. diguanylate phosphodiesterase [Fusobacterium nucleatum]			539 aa protein
gi	322419193	ref	YP_004198416.1		4.17894e-10	42.9	AAGTPELKDLF			401. rubrerythrin [Geobacter sp. M18]			YP_001208468.1 GI	146343420
gi	495413186	ref	WP_008137884.1		4.17191e-10	42.9	VTFAPELPGGF			871. hypothetical protein [Bradyrhizobium sp. YR681]
gi	295696773	ref	YP_003590011.1		4.03784e-10	57.1	AAFSPELADLF			321. urease accessory protein UreG [Kyrpidia tusciae DSM 2912]		146411909	134. hypothetical protein PGUG_05689 [Meyerozyma guilliermondii ATCC 6260]
gi	284048977	ref	YP_003399316.1		4.02855e-10	42.9	NTYAPEVLESF			309. 7-cyano-7-deazaguanine reductase [Acidaminococcus fermentans DSM 20731]			218 aa protein
gi	300855499	ref	YP_003780483.1		3.99881e-10	35.7	SAVRPEIAESW	SALRPEIREMW	72.7	351. sigma-54-interacting transcriptional regulator [Clostridium ljungdahlii DSM 13528]			XP_001481926.1 GI	146411909
gi	242020292	ref	XP_002430589.1		3.93822e-10	35.7	GSVKPEVLLAY			262. hypothetical protein Phum_PHUM491190 [Pediculus humanus corporis]
gi	401884837	gb	EJT48978.1		3.93472e-10	57.1	YALSPELKPLF			558. hypothetical protein A1Q1_01967 [Trichosporon asahii var. asahii CBS 2479]		146413993	135. hypothetical protein PGUG_04922 [Meyerozyma guilliermondii ATCC 6260]
gi	358058844	dbj	GAA95242.1		3.90298e-10	35.7	AAGTPELRQAW			470. hypothetical protein E5Q_01898 [Mixia osmundae IAM 14324]			256 aa protein
gi	300694019	ref	YP_003749992.1		3.8016e-10	28.6	ASSVPELRQGW			347. putative dipeptide transport ATP-binding protein dppD [Ralstonia solanacearum PSI07]			XP_001482967.1 GI	146413993
gi	494002869	ref	WP_006945417.1		3.76105e-10	42.9	WAGYPELADRF			821. cobyrinic acid a,c-diamide synthase, partial [Dermacoccus sp. Ellin185]
gi	495962612	ref	WP_008687191.1		3.73248e-10	42.9	LAISPELKEAY			890. hypothetical protein [Eubacterium sp. 3_1_31]		147918962	136. hypothetical protein RRC244 [Methanocella arvoryzae MRE50]
gi	471327442	ref	YP_007526472.1		3.64954e-10	42.9	AAVVPEVRAAW	RAFVPEVREAW	72.7	659. hypothetical protein BN159_7966 [Streptomyces davawensis JCM 4913]			586 aa protein
gi	347359751	ref	YP_386771.2		3.6288e-10	35.7	YSYVPELAPRY			458. ABC transporter periplasmic protein [Desulfovibrio alaskensis G20]			YP_687312.1 GI	147918962
gi	493584936	ref	WP_006537931.1		3.60836e-10	42.9	GTGAPEVPAGF			802. twin-arginine translocation pathway signal protein [Frankia sp. EUN1f]
gi	497190511	ref	WP_009504773.1		3.57299e-10	42.9	WTFVPEVGQYY					148222168	137. sodium-coupled monocarboxylate transporter 1 [Xenopus laevis]
gi	56696683	ref	YP_167044.1		3.44763e-10	42.9	RAGTPELLDAF			50. exonuclease, DNA polymerase III, epsilon subunit family [Ruegeria pomeroyi DSS-3]			622 aa protein
gi	119483526	ref	XP_001261666.1		3.4344e-10	42.9	VSSSPELRAVF			93. hypothetical protein NFIA_093890 [Neosartorya fischeri NRRL 181]			NP_001084454.1 GI	148222168
gi	300786646	ref	YP_003766937.1		3.40845e-10	42.9	EALRPELAGRF			349. non-ribosomal peptide synthetase [Amycolatopsis mediterranei U32]
gi	334144197	ref	YP_004537353.1		3.37824e-10	28.6	NSVVPELPQLY			428. glutathione S-transferase domain-containing protein [Thioalkalimicrobium cyclicum ALM1]		148225208	138. O(6)-methylguanine-induced apoptosis 2 [Xenopus laevis]
gi	256389342	ref	YP_003110906.1		3.34541e-10	35.7	RAYAPELRAAW			282. 5-formyltetrahydrofolate cyclo-ligase [Catenulispora acidiphila DSM 44928]			352 aa protein
gi	496825771	ref	WP_009374852.1		3.34446e-10	42.9	SAVAPELAEMW			914. MFS transporter [Halogranum salarium]			NP_001089693.1 GI	148225208
gi	387914812	gb	AFK11015.1		3.31531e-10	28.6	GTGTPEIAGLY			521. agmat-prov protein [Callorhinchus milii]
gi	361130378	gb	EHL02191.1		3.28252e-10	35.7	STGHPELAMGF			477. putative Zinc-type alcohol dehydrogenase-like protein [Glarea lozoyensis 74030]		148261746	139. DSBA oxidoreductase [Acidiphilium cryptum JF-5]
gi	508706394	gb	EOX98290.1		3.25552e-10	35.7	GSSYPEIAQRF			983. PIF / Ping-Pong family of plant transposases [Theobroma cacao]			204 aa protein
gi	338534791	ref	YP_004668125.1		3.1482e-10	42.9	ASSHPEVRAFF			436. hypothetical protein LILAB_25770 [Myxococcus fulvus HW-1]			YP_001235873.1 GI	148261746
gi	301766892	ref	XP_002918867.1		3.11696e-10	35.7	VTGTPELKPKW			355. PREDICTED
gi	24214310	ref	NP_711791.1		3.11089e-10	42.9	ETLSPEIGLIF			32. UDP-N-acetylglucosamine 2-epimerase [Leptospira interrogans serovar Lai str. 56601]		148262086	140. chromosomal replication initiation protein [Geobacter uraniireducens Rf4]
gi	262202354	ref	YP_003273562.1		3.10068e-10	28.6	RSLVPELLAVY			293. non-ribosomal peptide synthase [Gordonia bronchialis DSM 43247]			449 aa protein
gi	330507404	ref	YP_004383832.1		3.04042e-10	28.6	STVAPELKMVY			414. CO dehydrogenase/acetyl-CoA synthase complex subunit gamma [Methanosaeta concilii GP6]			YP_001228792.1 GI	148262086
gi	116669221	ref	YP_830154.1		2.99289e-10	57.1	RAFAPEVPALF			83. two component transcriptional regulator [Arthrobacter sp. FB24]
gi	319789937	ref	YP_004151570.1		2.93276e-10	42.9	SSFTPELLQSF			389. peptidase M16 domain protein [Thermovibrio ammonificans HB-1]		148269746	141. alpha-xylosidase YicI [Thermotoga petrophila RKU-1]
gi	387875465	ref	YP_006305769.1		2.88541e-10	35.7	ATVRPEVAHAW			519. AraC family transcriptional regulator [Mycobacterium sp. MOTT36Y]			764 aa protein
gi	493634806	ref	WP_006586642.1		2.8439e-10	35.7	KTVTPEIPDGY			805. adhesin [Lactobacillus jensenii]			YP_001244206.1 GI	148269746
gi	42521732	ref	NP_967112.1		2.84368e-10	42.9	ETYAPEVLEAF			38. GTP cyclohydrolase I [Bdellovibrio bacteriovorus HD100]
gi	149721853	ref	XP_001491688.1		2.83968e-10	35.7	SSLSPELGGKY			150. PREDICTED		148284350	142. D-alanine--D-alanine ligase [Orientia tsutsugamushi str. Boryong]
gi	493615501	ref	WP_006567755.1		2.833e-10	50	EALSPELADAF			804. hypothetical protein [Anaerostipes caccae]			291 aa protein
gi	506932646	ref	YP_008013084.1		2.833e-10	50	KALVPELLAAF	KSLVPELKPAF	72.7	966. hypothetical protein AORI_4096 [Amycolatopsis orientalis HCCB10007]			YP_001248440.1 GI	148284350
gi	495687433	ref	WP_008412012.1		2.78784e-10	42.9	KACRPEIAGSW			882. DNA polymerase III subunit gamma/tau [Desulfotomaculum hydrothermale]
gi	485638741	gb	EOD33124.1		2.77339e-10	42.9	YTLRPEVLPRY			685. hypothetical protein EMIHUDRAFT_98831 [Emiliania huxleyi CCMP1516]		148555782	143. hypothetical protein Swit_2874 [Sphingomonas wittichii RW1]
gi	489553659	ref	WP_003458258.1		2.75616e-10	35.7	EALYPEIRGFY			714. Cystathionine beta-lyase [Pseudomonas pseudoalcaligenes]			602 aa protein
gi	342321467	gb	EGU13400.1		2.72844e-10	50	GAGAPEIAPLF			446. hypothetical protein RTG_00110 [Rhodotorula glutinis ATCC 204091]			YP_001263364.1 GI	148555782
gi	255084653	ref	XP_002508901.1		2.68646e-10	42.9	AAVVPELRAFF			270. predicted protein [Micromonas sp. RCC299]
gi	292493983	ref	YP_003533125.1		2.68646e-10	42.9	RAYAPELRGSF			316. iron transport protein A [Haloferax volcanii DS2]		148653704	144. ferredoxin-dependent glutamate synthase [Psychrobacter sp. PRwf-1]
gi	493670489	ref	WP_006620831.1		2.64496e-10	50	AAGRPEVAQMW						581 aa protein
gi	494776784	ref	WP_007512192.1		2.57453e-10	42.9	LTISPELGLSF			845. amidase [Frankia sp. CN3]			YP_001280797.1 GI	148653704
gi	497523046	ref	WP_009837244.1		2.5674e-10	57.1	KALYPEVGHYF			930. phosphopantetheinyl transferase [Pseudoalteromonas tunicata]
gi	497719920	ref	WP_010034104.1		2.51016e-10	50	GAGAPEVPGSF					148670789	145. WD repeat domain 21 [Mus musculus]
gi	145348171	ref	XP_001418529.1		2.50838e-10	42.9	LALKPELAGSF			124. P-ATPase family transporter			518 aa protein
gi	507763663	gb	EOS22354.1		2.49493e-10	42.9	ETFSPELAEVY			976. hypothetical protein C804_05760 [Lachnospiraceae bacterium A4]			EDL02736.1 GI	148670789
gi	427704024	ref	YP_007047246.1		2.48994e-10	35.7	VSLAPELAHAF			591. hypothetical protein Cyagr_2813 [Cyanobium gracile PCC 6307]
gi	493394054	ref	WP_006350191.1		2.46259e-10	42.9	LAGRPELGGLF			791. recombinase RecB [Streptomyces tsukubaensis]		148676017	146. coiled-coil domain containing 3, isoform CRA_b [Mus musculus]
gi	495364897	ref	WP_008089614.1		2.46259e-10	42.9	LAGRPELLGLF			868. methyl-accepting chemotaxis protein [Pseudomonas sp. GM84]			318 aa protein
gi	490480429	ref	WP_004350760.1		2.44567e-10	50	GALKPEVGQAF			742. peptidyl-dipeptidase [Prevotella buccalis]			EDL07964.1 GI	148676017
gi	346971477	gb	EGY14929.1		2.43763e-10	35.7	ATVVPELPPLY			457. leucine Rich Repeat domain-containing protein [Verticillium dahliae VdLs.17]
gi	301618787	ref	XP_002938789.1		2.41114e-10	35.7	GAYYPEIPGRY					148692031	147. myelin-associated glycoprotein [Mus musculus]
gi	497522197	ref	WP_009836395.1		2.385e-10	35.7	LSVAPEIKHIF			929. hypothetical protein [Pseudoalteromonas tunicata]			582 aa protein
gi	495747595	ref	WP_008472174.1		2.38199e-10	35.7	WTFVPELGQYY			885. glucan 1,6-alpha-glucosidase [Lactobacillus gigeriorum]			EDL23978.1 GI	148692031
gi	495145889	ref	WP_007870696.1		2.35224e-10	28.6	ASSRPELALAY	ASFRPELALRY	81.8	859. acyl-CoA dehydrogenase [Polaromonas sp. CF318]
gi	118468525	ref	YP_889534.1		2.35108e-10	35.7	VTGSPELGLAW			86. serine/threonine protein kinase [Mycobacterium smegmatis str. MC2 155]		148822966	148. hypothetical protein TBFG_11777 [Mycobacterium tuberculosis F11]
gi	296269926	ref	YP_003652558.1		2.29522e-10	35.7	RTVTPEVRAAY			329. AMP-dependent synthetase and ligase [Thermobispora bispora DSM 43833]			367 aa protein
gi	319795305	ref	YP_004156945.1		2.28349e-10	42.9	SAYVPELALGF			391. hypothetical protein Varpa_4671 [Variovorax paradoxus EPS]			YP_001287720.1 GI	148822966
gi	315497736	ref	YP_004086540.1		2.25271e-10	35.7	YTGAPEIGGRF			387. transcription factor jumonji jmjc domain-containing protein [Asticcacaulis excentricus CB 48]
gi	358385627	gb	EHK23223.1		2.24421e-10	50	KAGTPEVPLLY			475. hypothetical protein TRIVIDRAFT_56176 [Trichoderma virens Gv29-8]		149635050	149. PREDICTED	centrosomal protein of 112 kDa isoform X1 [Ornithorhynchus anatinus]
gi	297568629	ref	YP_003689973.1		2.23872e-10	50	KAGYPEIKHLF			333. PAS/PAC sensor hybrid histidine kinase [Desulfurivibrio alkaliphilus AHT2]			953 aa protein
gi	489175396	ref	WP_003084922.1		2.23872e-10	42.9	VSVSPELLDFF			707. hypothetical protein [Streptococcus porcinus]			XP_001508817.1 GI	149635050
gi	496519668	ref	WP_009227951.1		2.21175e-10	50	YTVSPEVLERF			909. prenyltransferase UbiA [Prevotella sp. oral taxon 299]
gi	148670789	gb	EDL02736.1		2.18592e-10	28.6	ESSVPELPGFY			145. WD repeat domain 21 [Mus musculus]		149721853	150. PREDICTED	myelin-associated glycoprotein isoform X1 [Equus caballus]
gi	167646361	ref	YP_001684024.1		2.1762e-10	28.6	ATVTPELLDAW			193. AraC family transcriptional regulator [Caulobacter sp. K31]			626 aa protein
gi	496173869	ref	WP_008898376.1		2.14618e-10	35.7	LTISPELAEKY						XP_001491688.1 GI	149721853
gi	14591555	ref	NP_143637.1		2.1451e-10	50	NAFAPELLDLF			15. hypothetical protein PH1802 [Pyrococcus horikoshii OT3]
gi	334324361	ref	XP_001381838.2		2.129e-10	28.6	VSSKPELPLFY					150004561	151. hypothetical protein BVU_2016 [Bacteroides vulgatus ATCC 8482]
gi	27379050	ref	NP_770579.1		2.12475e-10	50	AALAPEVGDAF			34. transcriptional regulator [Bradyrhizobium diazoefficiens USDA 110]			222 aa protein
gi	187922026	ref	YP_001893615.1		2.11968e-10	42.9	ATVSPELRPLY			210. hypothetical protein Bphyt_7401 [Burkholderia phytofirmans PsJN]			YP_001299305.1 GI	150004561
gi	182414774	ref	YP_001819840.1		2.11306e-10	28.6	ETLAPELRAKW			201. glycoside hydrolase family 42 [Opitutus terrae PB90-1]
gi	403369965	gb	EJY84840.1		2.09088e-10	35.7	ASISPELLLFY			567. hypothetical protein OXYTRI_17309 [Oxytricha trifallax]		150007548	152. hypothetical protein BDI_0901 [Parabacteroides distasonis ATCC 8503]
gi	125531159	gb	EAY77724.1		2.08656e-10	28.6	ATCTPELKELY	NTFTPELKELW	72.7	108. hypothetical protein OsI_32765 [Oryza sativa Indica Group]			1223 aa protein
gi	357167412	ref	XP_003581150.1		2.08201e-10	57.1	RAFAPEVGDLF			467. PREDICTED			YP_001302291.1 GI	150007548
gi	145299407	ref	YP_001142248.1		2.06942e-10	42.9	NALYPELAAFF			123. type VI secretion system clpB chaperone [Aeromonas salmonicida subsp. salmonicida A449]
gi	159109061	ref	XP_001704797.1		2.06917e-10	35.7	NTVTPEVRARY			177. Protein 21.1 [Giardia lamblia ATCC 50803]		150398469	153. putative permease ABC transporter protein [Sinorhizobium medicae WSM419]
gi	332306726	ref	YP_004434577.1		2.06064e-10	42.9	VSVAPEVAGAF			420. multi-sensor hybrid histidine kinase [Glaciecola sp. 4H-3-7+YE-5]			565 aa protein
gi	328711396	ref	XP_001945524.2		2.04792e-10	35.7	LTSTPELKAAF						YP_001328936.1 GI	150398469
gi	261327425	emb	CBH10400.1		2.01485e-10	50	LAGYPEVAGLF			289. leucine-rich repeat protein (LRRP), putative [Trypanosoma brucei gambiense DAL972]
gi	51891408	ref	YP_074099.1		2.00448e-10	42.9	LALSPELRAAY			48. transposase [Symbiobacterium thermophilum IAM 14863]		150864806	154. hypothetical protein PICST_65421 [Scheffersomyces stipitis CBS 6054]
gi	465954050	gb	EMP25700.1		1.99331e-10	35.7	GAGVPELAQFW			643. Motile sperm domain-containing protein 2 [Chelonia mydas]			1911 aa protein
gi	485626061	gb	EOD21845.1		1.98099e-10	28.6	VSLAPELPLKY			684. hypothetical protein EMIHUDRAFT_240876 [Emiliania huxleyi CCMP1516]			XP_001383782.2 GI	150864806
gi	497965384	ref	WP_010279540.1		1.96736e-10	50	AALSPEIKQLF			941. hypothetical protein [Paenibacillus senegalensis]
gi	494269125	ref	WP_007155622.1		1.94769e-10	42.9	EALYPELADFF			829. ATPase AAA [Marinobacter algicola]		152965477	155. hypothetical protein Krad_1509 [Kineococcus radiotolerans SRS30216 = ATCC BAA-149]
gi	166240097	ref	XP_646765.2		1.94616e-10	50	SSSSPEVAQLF			188. origin recognition complex subunit 3 [Dictyostelium discoideum AX4]			311 aa protein
gi	159479006	ref	XP_001697589.1		1.9309e-10	42.9	LTGSPELLAVF			180. predicted protein [Chlamydomonas reinhardtii]			YP_001361261.1 GI	152965477
gi	348515351	ref	XP_003445203.1		1.9074e-10	35.7	SSSKPELLPSW
gi	494835030	ref	WP_007561130.1		1.88892e-10	35.7	RSYAPELGAVF			850. phosphoenolpyruvate synthase [Bacteroides plebeius]		152984326	156. iron transporter [Pseudomonas aeruginosa PA7]
gi	86740647	ref	YP_481047.1		1.88892e-10	42.9	ASGAPEVLAAF			62. nitrogen-fixing NifU-like protein [Frankia sp. CcI3]			584 aa protein
gi	471368991	ref	XP_004375017.1		1.88129e-10	50	SACVPEVLAYF			660. PREDICTED			Record removed.
gi	406699776	gb	EKD02972.1		1.83744e-10	50	RALSPELRPSY			572. hypothetical protein A1Q2_02689 [Trichosporon asahii var. asahii CBS 8904]			YP_001348454.1 GI	152984326
gi	490036681	ref	WP_003939104.1		1.81336e-10	50	RASSPELAEAF			727. phosphomannomutase/phosphoglucomutase [Rhodococcus ruber]
gi	430742153	ref	YP_007201282.1		1.76418e-10	28.6	ESSRPELAEGW	ASFRPELAEFW	72.7	602. ribonuclease D [Singulisphaera acidiphila DSM 18658]		152989786	157. sulfur oxidation protein, Rieske-I iron sulfur protein SoxL [Nitratiruptor sp. SB155-2]
gi	490550469	ref	WP_004415585.1		1.75587e-10	50	SALSPELAQRF			743. general secretion pathway protein B [Vibrio orientalis]			242 aa protein
gi	357136947	ref	XP_003570064.1		1.73775e-10	42.9	KAGKPELALSW			466. PREDICTED			YP_001355508.1 GI	152989786
gi	146313021	ref	YP_001178095.1		1.72025e-10	50	KTVTPEVAQRF			132. hypothetical protein Ent638_3384 [Enterobacter sp. 638]
gi	494870966	ref	WP_007597062.1		1.71806e-10	35.7	ETLAPELAESF			853. ABC transporter substrate-binding protein [Bradyrhizobium sp. WSM1253]		152999153	158. transposase IS66 [Shewanella baltica OS185]
gi	326933310	ref	XP_003212749.1		1.71072e-10	28.6	ASSVPELGESW						514 aa protein
gi	495754339	ref	WP_008478918.1		1.68487e-10	42.9	SASKPEIKLSF						YP_001364834.1 GI	152999153
gi	485616073	gb	EOD13479.1		1.68399e-10	28.6	ESVRPELAERY	ASFRPELALRY	72.7	683. trypsin [Emiliania huxleyi CCMP1516]
gi	497235027	ref	WP_009549289.1		1.66518e-10	28.6	VSLAPELLHYW			922. membrane protein involved in the export of O-antigen and teichoic acid [Burkholderiales bacterium JOSHI_001]		153947735	159. NAD dependent epimerase/dehydratase family protein [Yersinia pseudotuberculosis IP 31758]
gi	494680611	ref	WP_007437946.1		1.65063e-10	35.7	YALTPELALRW						320 aa protein
gi	392412804	ref	YP_006449411.1		1.64851e-10	42.9	YAIAPEIADVF			538. succinate dehydrogenase/fumarate reductase flavoprotein subunit [Desulfomonile tiedjei DSM 6799]			YP_001401076.1 GI	153947735
gi	507753073	gb	EOS12015.1		1.6443e-10	42.9	VSLTPEVAPLY			975. hypothetical protein C802_02591 [Bacteroides massiliensis dnLKV3]
gi	493952149	ref	WP_006895992.1		1.64317e-10	28.6	ETITPEIAERY			818. hypothetical protein [Gordonia sihwensis]		154315441	160. hypothetical protein BC1G_04293 [Botrytis cinerea B05.10]
gi	472584470	gb	EMS22064.1		1.63706e-10	57.1	GAGAPEVAPLF			668. hypothetical protein RHTO_01279 [Rhodosporidium toruloides NP11]			506 aa protein
gi	489813319	ref	WP_003717163.1		1.63282e-10	35.7	NTLVPELLPGY			719. diaminopimelate epimerase [Lactobacillus vaginalis]			XP_001557043.1 GI	154315441
gi	490474701	ref	WP_004345126.1		1.62307e-10	42.9	RALHPELKMSF			741. LysR family transcriptional regulator [Thauera linaloolentis]
gi	121710972	ref	XP_001273102.1		1.59732e-10	42.9	SSLSPEVAQKY			103. fatty acid synthase subunit alpha, putative [Aspergillus clavatus NRRL 1]		154317581	161. hypothetical protein BC1G_03142 [Botrytis cinerea B05.10]
gi	460379915	ref	XP_004235705.1		1.55544e-10	42.9	LALHPELPAFF			637. PREDICTED			468 aa protein
gi	296103168	ref	YP_003613314.1		1.53912e-10	35.7	ASGHPELGLLF			325. putative inner membrane protein [Enterobacter cloacae subsp. cloacae ATCC 13047]			XP_001558110.1 GI	154317581
gi	150007548	ref	YP_001302291.1		1.50336e-10	35.7	ASLYPEVGDKY			152. hypothetical protein BDI_0901 [Parabacteroides distasonis ATCC 8503]
gi	448097137	ref	XP_004198597.1		1.4688e-10	28.6	SSIHPEILDLY			616. Piso0_001977 [Millerozyma farinosa CBS 7064]		154418556	162. hypothetical protein [Trichomonas vaginalis G3]
gi	490736945	ref	WP_004599267.1		1.458e-10	35.7	LSSAPEVRAAY			746. signal-transducing histidine kinase [Halorubrum distributum]			748 aa protein
gi	90423596	ref	YP_531966.1		1.44245e-10	42.9	EAVVPEIAERF			66. hypothetical protein RPC_2093 [Rhodopseudomonas palustris BisB18]			XP_001582296.1 GI	154418556
gi	490130304	ref	WP_004030690.1		1.37376e-10	50	YSYSPEVLAVF			735. membrane protein [Methanobacterium formicicum]
gi	170743699	ref	YP_001772354.1		1.36858e-10	50	RAISPEVRAAY			198. FAD linked oxidase domain-containing protein [Methylobacterium sp. 4-46]		154685300	163. hypothetical protein RBAM_008460 [Bacillus amyloliquefaciens subsp. plantarum str. FZB42]
gi	342880456	gb	EGU81571.1		1.34746e-10	35.7	YAGAPEILDYW			448. hypothetical protein FOXB_07916 [Fusarium oxysporum Fo5176]			200 aa protein
gi	19112964	ref	NP_596172.1		1.3464e-10	28.6	SSSYPELKQIW			27. morphogenesis protein Mor2 [Schizosaccharomyces pombe 972h-]			YP_001420461.1 GI	154685300
gi	490060593	ref	WP_003962848.1		1.34323e-10	42.9	LASRPELLDAF			729. iron-sulfur protein [Streptomyces clavuligerus]
gi	244538939	dbj	BAH82982.1		1.3068e-10	35.7	KSSYPEILLFY			267. DNA mismatch repair protein [Candidatus Ishikawaella capsulata Mpkobe]		154687026	164. hypothetical protein RBAM_025980 [Bacillus amyloliquefaciens subsp. plantarum str. FZB42]
gi	469663723	gb	AGH69814.1		1.29744e-10	35.7	ESVKPELAGKF			647. non-ribosomal peptide synthase [Nostoc sp. 'Peltigera membranacea cyanobiont']			264 aa protein
gi	491865979	ref	WP_005641529.1		1.27181e-10	42.9	ETISPEVKDLY						YP_001422187.1 GI	154687026
gi	149635050	ref	XP_001508817.1		1.2672e-10	57.1	KSSSPEVLPGW			149. PREDICTED
gi	401408963	ref	XP_003883930.1		1.22941e-10	57.1	KALSPEVPGGY			557. putative protein kinase [Neospora caninum Liverpool]		156049857	165. hypothetical protein SS1G_08636 [Sclerotinia sclerotiorum 1980 UF-70]
gi	495750316	ref	WP_008474895.1		1.20891e-10	50	RAIAPEVGGAF			886. aldehyde dehydrogenase [Nitrolancea hollandica]			1469 aa protein
gi	150398469	ref	YP_001328936.1		1.20145e-10	42.9	WTGSPELGARF			153. putative permease ABC transporter protein [Sinorhizobium medicae WSM419]			XP_001590895.1 GI	156049857
gi	120437497	ref	YP_863183.1		1.19232e-10	35.7	YTYSPEIKESY			100. patatin-like phospholipase [Gramella forsetii KT0803]
gi	339998769	ref	YP_004729652.1		1.17999e-10	35.7	ATGHPEIGLLF			440. hypothetical protein SBG_0767 [Salmonella bongori NCTC 12419]		156102985	166. Mitotic apparatus protein p62 [Plasmodium vivax Sal-1]
gi	497290246	ref	WP_009604463.1		1.1785e-10	57.1	RAFSPELAPAY						318 aa protein
gi	408671839	ref	YP_006871587.1		1.15396e-10	50	KAVTPELGEVF			580. carbonic anhydrase/acetyltransferase isoleucine patch superfamily-like protein [Emticicia oligotrophica DSM 17448]			XP_001617185.1 GI	156102985
gi	342879510	gb	EGU80756.1		1.15258e-10	35.7	WTLHPEVRHLY			447. hypothetical protein FOXB_08726 [Fusarium oxysporum Fo5176]
gi	410671183	ref	YP_006923554.1		1.10588e-10	42.9	ETYTPEVLEKF			585. flavoprotein WrbA [Methanolobus psychrophilus R15]		156373038	167. predicted protein [Nematostella vectensis]
gi	507061977	ref	WP_016132819.1		1.0692e-10	28.6	LSYRPELLQVY			970. phosphoesterase [Bacillus cereus]			1162 aa protein
gi	126178525	ref	YP_001046490.1		1.06906e-10	42.9	AALSPELRGKY			111. 50S ribosomal protein L24 [Methanoculleus marisnigri JR1]			XP_001629341.1 GI	156373038
gi	470159959	ref	YP_007531888.1		1.06445e-10	35.7	EAITPEIAGAW			650. putative flavohemoprotein [Corynebacterium callunae DSM 20147]
gi	428176806	gb	EKX45689.1		1.06102e-10	57.1	SASSPELLDMF			593. hypothetical protein GUITHDRAFT_71210 [Guillardia theta CCMP2712]		156389056	168. predicted protein [Nematostella vectensis]
gi	148222168	ref	NP_001084454.1		1.04544e-10	28.6	VSSRPELADSW			137. sodium-coupled monocarboxylate transporter 1 [Xenopus laevis]			374 aa protein
gi	408392023	gb	EKJ71387.1		1.03747e-10	42.9	LSLAPEVLQSF			579. hypothetical protein FPSE_08435 [Fusarium pseudograminearum CS3096]			XP_001634808.1 GI	156389056
gi	358339479	dbj	GAA47537.1		1.03599e-10	28.6	NTSYPELPGLY			473. partitioning defective protein 3 [Clonorchis sinensis]
gi	261416377	ref	YP_003250060.1		1.02981e-10	42.9	ETGSPELAGIF			290. hypothetical protein Fisuc_1990 [Fibrobacter succinogenes subsp. succinogenes S85]		156934923	169. multifunctional acyl-CoA thioesterase I and protease I and lysophospholipase L1 [Cronobacter sakazakii ATCC BAA-894]
gi	493342151	ref	WP_006299010.1		1.01059e-10	42.9	EALHPEVRLKW	KTLHPEVRLSW	72.7	787. biotin--acetyl-CoA-carboxylase ligase [Hylemonella gracilis]			219 aa protein
gi	493653639	ref	WP_006605114.1		1.01059e-10	35.7	VALRPEIAGGW			806. hypothetical protein [Streptomyces auratus]			YP_001438839.1 GI	156934923
gi	184154958	ref	YP_001843298.1		9.8658e-11	35.7	WSLTPEVGQVY			205. hypothetical protein LAF_0482 [Lactobacillus fermentum IFO 3956]
gi	118618105	ref	YP_906437.1		9.85651e-11	50	AAFVPEVPGSY			88. peptide synthetase Nrp (peptide synthase) [Mycobacterium ulcerans Agy99]		157146499	170. hypothetical protein CKO_02259 [Citrobacter koseri ATCC BAA-895]
gi	488729304	ref	WP_002652732.1		9.67398e-11	57.1	KTFSPELLQSF			699. probable gntR-family transcription regulator [Blastopirellula marina]			100 aa protein
gi	496399433	ref	WP_009108423.1		9.65448e-11	35.7	ETSRPEIGMKF			898. hypothetical protein [Desulfovibrio sp. U5L]			YP_001453818.1 GI	157146499
gi	302864567	ref	YP_003833204.1		9.6228e-11	28.6	RSVAPELAELY			360. RNA polymerase sigma-70 factor [Micromonospora aurantiaca ATCC 27029]
gi	118465463	ref	YP_881901.1		9.61805e-11	35.7	ATVRPEVLHAW			85. AraC family transcriptional regulator [Mycobacterium avium 104]		157737372	171. hypothetical protein Abu_1126 [Arcobacter butzleri RM4018]
gi	222053118	ref	YP_002535480.1		9.61632e-11	50	KASYPEIGERF			245. chromosomal replication initiation protein [Geobacter daltonii FRC-32]			579 aa protein
gi	320104128	ref	YP_004179719.1		9.5832e-11	35.7	LACRPELALGW			392. methyltransferase GidB [Isosphaera pallida ATCC 43644]			YP_001490055.1 GI	157737372
gi	5852599	gb	AAD54123.1	AF134923_1	9.58272e-11	35.7	LTFTPELGDIY			8. MHC class II antigen, partial [Amia calva]
gi	386836207	ref	YP_006241265.1		9.504e-11	28.6	WSYAPEIAQSW			515. alpha-galactosidase [Streptomyces hygroscopicus subsp. jinggangensis 5008]		158312528	172. putative alkylated DNA repair protein [Frankia sp. EAN1pec]
gi	497720284	ref	WP_010034468.1		9.32659e-11	35.7	ATGSPELLDAY			931. 4-hydroxybenzoate 3-monooxygenase [Streptomyces chartreusis]			227 aa protein
gi	191639588	ref	YP_001988754.1		9.22061e-11	35.7	WTYVPEVGQYY			217. alpha-glucosidase [Lactobacillus casei BL23]			YP_001505036.1 GI	158312528
gi	497305014	ref	WP_009619231.1		9.00864e-11	35.7	SAYVPEIPQLY
gi	497928539	ref	WP_010242695.1		8.92109e-11	57.1	KAVSPEVLLAW					158318917	173. AraC family transcriptional regulator [Frankia sp. EAN1pec]
gi	291299321	ref	YP_003510599.1		8.87844e-11	35.7	STLAPEVLAYY			315. type 11 methyltransferase [Stackebrandtia nassauensis DSM 44728]			297 aa protein
gi	255533257	ref	YP_003093629.1		8.7768e-11	35.7	ASSHPELPHAF			274. sulfatase [Pedobacter heparinus DSM 2366]			YP_001511425.1 GI	158318917
gi	148692031	gb	EDL23978.1		8.70835e-11	35.7	STLSPELGGKY			147. myelin-associated glycoprotein [Mus musculus]
gi	495569084	ref	WP_008293663.1		8.3952e-11	35.7	ASGAPELLGGF					158425029	174. flavin-containing protein [Azorhizobium caulinodans ORS 571]
gi	497278564	ref	WP_009592781.1		8.36114e-11	35.7	STGYPEVAAAY						542 aa protein
gi	159903468	ref	YP_001550812.1		8.30025e-11	35.7	SSFTPEILAKY			183. transcriptional-repair coupling factor [Prochlorococcus marinus str. MIT 9211]			YP_001526321.1 GI	158425029
gi	119187369	ref	XP_001244291.1		7.95763e-11	35.7	VTVKPELGGAF			89. predicted protein [Coccidioides immitis RS]
gi	470168690	ref	YP_007549576.1		7.89912e-11	42.9	AASYPEIPESF			651. aminotransferase class-I [Azoarcus sp. KH32C]		158425270	175. peptide transporter substrate-binding protein [Azorhizobium caulinodans ORS 571]
gi	86742735	ref	YP_483135.1		7.48954e-11	50	ATYSPEVGGSF			63. IucA/IucC protein [Frankia sp. CcI3]			546 aa protein
gi	251794754	ref	YP_003009485.1		7.38778e-11	50	RAISPELALSF			269. LuxR family transcriptional regulator [Paenibacillus sp. JDR-2]			YP_001526562.1 GI	158425270
gi	386359530	ref	YP_006057775.1		7.31808e-11	42.9	WAGRPELAPRY			513. hypothetical protein TtJL18_0065 [Thermus thermophilus JL-18]
gi	493493115	ref	WP_006447780.1		7.27688e-11	57.1	VAFTPEVAEMY					159042221	176. glycoside hydrolase [Caldivirga maquilingensis IC-167]
gi	490018843	ref	WP_003921357.1		7.21354e-11	35.7	VTVRPEVAHAW						784 aa protein
gi	386857892	ref	YP_006262069.1		7.19316e-11	42.9	GALHPEIAQAF			517. Phenylalanyl-tRNA synthetase, beta subunit [Deinococcus gobiensis I-0]			YP_001541473.1 GI	159042221
gi	474323928	gb	EMS62408.1		7.1874e-11	28.6	RSSRPELAASW			669. hypothetical protein TRIUR3_12581 [Triticum urartu]
gi	336273168	ref	XP_003351339.1		6.92604e-11	50	VACRPEVLLAF			432. hypothetical protein SMAC_03644 [Sordaria macrospora k-hell]		159109061	177. Protein 21.1 [Giardia lamblia ATCC 50803]
gi	495261510	ref	WP_007986265.1		6.8688e-11	42.9	VSVAPEVGGAF			864. hypothetical protein [Glaciecola chathamensis]			413 aa protein
gi	108805551	ref	YP_645488.1		6.86743e-11	42.9	GALAPEVPAGW			71. hypothetical protein Rxyl_2761 [Rubrobacter xylanophilus DSM 9941]			XP_001704797.1 GI	159109061
gi	478263720	gb	ENN82023.1		6.75814e-11	42.9	ATVAPEVGLRF			672. hypothetical protein YQE_01598, partial [Dendroctonus ponderosae]
gi	488783208	ref	WP_002695615.1		6.7575e-11	42.9	YSSKPEILPSF			700. serine/threonine protein kinases, putative [Microscilla marina]		159468790	178. copper response defect 1 protein [Chlamydomonas reinhardtii]
gi	383759683	ref	YP_005438669.1		6.70956e-11	35.7	GTGKPELLPIY			505. aconitate hydrase 1 [Rubrivivax gelatinosus IL144]			407 aa protein
gi	351711085	gb	EHB14004.1		6.65933e-11	35.7	GTLSPELGGKY			464. Myelin-associated glycoprotein [Heterocephalus glaber]			XP_001692557.1 GI	159468790
gi	223649186	gb	ACN11351.1		6.64435e-11	42.9	GAGSPELAQFW			248. Motile sperm domain-containing protein 2 [Salmo salar]
gi	493465996	ref	WP_006421176.1		6.51264e-11	42.9	AAYVPELKALF			797. metallo-beta-lactamase domain protein [delta proteobacterium NaphS2]		159472787	179. predicted protein [Chlamydomonas reinhardtii]
gi	465955284	gb	EMP26366.1		6.50496e-11	35.7	VAGTPELKMKW			644. Titin, partial [Chelonia mydas]			388 aa protein
gi	491617711	ref	WP_005475263.1		6.41203e-11	42.9	AAGAPEVPGSW			765. sugar hydrolase [Streptomyces bottropensis]			XP_001694526.1 GI	159472787
gi	497535006	ref	WP_009849204.1		6.2964e-11	42.9	ASVRPEVGAIF
gi	496372629	ref	WP_009081619.1		6.26842e-11	42.9	WAGHPELADRF			897. cobyrinic acid a,c-diamide synthase [Streptomyces sp. AA4]		159479006	180. predicted protein [Chlamydomonas reinhardtii]
gi	491640332	ref	WP_005497861.1		6.23519e-11	42.9	VTFRPEILHSF			766. xanthine permease [Shewanella benthica]			3730 aa protein
gi	446603766	ref	WP_000681112.1		6.15648e-11	42.9	AAGYPEIGLLF			615. membrane protein [Escherichia coli]			XP_001697589.1 GI	159479006
gi	226186637	dbj	BAH34741.1		6.15415e-11	42.9	GALTPELGHFF			252. probable long-chain fatty-acid--CoA ligase [Rhodococcus erythropolis PR4]
gi	186685416	ref	YP_001868612.1		6.12e-11	35.7	SSVSPEIKQKY			207. patatin [Nostoc punctiforme PCC 73102]		159488935	181. predicted protein [Chlamydomonas reinhardtii]
gi	491826969	ref	WP_005620100.1		6.08256e-11	50	KAVRPEVKGLY						149 aa protein
gi	302414820	ref	XP_003005242.1		6.048e-11	28.6	VSITPEILDLY			359. conserved hypothetical protein [Verticillium alfalfae VaMs.102]			XP_001702456.1 GI	159488935
gi	281206247	gb	EFA80436.1		6.04032e-11	35.7	GAGHPEIADIW			302. hypothetical protein PPL_07271 [Polysphondylium pallidum PN500]
gi	332031165	gb	EGI70742.1		5.8806e-11	28.6	RSIAPELALGY			418. hypothetical protein G5I_00537 [Acromyrmex echinatior]		159902726	182. N-acetylglucosamine-6-phosphate deacetylase [Prochlorococcus marinus str. MIT 9211]
gi	148284350	ref	YP_001248440.1		5.8725e-11	28.6	LSSYPEIAQYY			142. D-alanine--D-alanine ligase [Orientia tsutsugamushi str. Boryong]			383 aa protein
gi	490403590	ref	WP_004278075.1		5.859e-11	35.7	LSFTPELAAKY			738. DNA topoisomerase I [Campylobacter upsaliensis]			YP_001550070.1 GI	159902726
gi	493834289	ref	WP_006781540.1		5.859e-11	42.9	ESFSPEIAARY			813. hypothetical protein [[Clostridium] hathewayi]
gi	459942335	dbj	BAM95905.1		5.8512e-11	35.7	WTSHPEIKAAF	WTSHPEIRAYF	81.8	636. lipoxygenase [Ricciocarpos natans]		159903468	183. transcriptional-repair coupling factor [Prochlorococcus marinus str. MIT 9211]
gi	392406229	ref	YP_006442839.1		5.74992e-11	35.7	RAIRPEIAQSW			537. hypothetical protein Mycch_5905 [Mycobacterium chubuense NBB4]			1169 aa protein
gi	47209789	emb	CAF91773.1		5.7024e-11	28.6	ASYRPELAALY	ASFRPELALRY	72.7	44. unnamed protein product, partial [Tetraodon nigroviridis]			YP_001550812.1 GI	159903468
gi	494530034	ref	WP_007319485.1		5.5968e-11	64.3	EAGSPEVKPIF			837. membrane protein [Gordonia effusa]
gi	288962814	ref	YP_003453108.1		5.568e-11	50	AALSPEIKPIY			311. TRAP dicarboxylate transporter [Azospirillum sp. B510]		160873760	184. transposase IS66 [Shewanella baltica OS195]
gi	378727370	gb	EHY53829.1		5.5332e-11	42.9	YASAPEIRQYF			496. cyclohexanone monooxygenase [Exophiala dermatitidis NIH/UT8656]			514 aa protein
gi	498497077	ref	WP_010797805.1		5.53146e-11	35.7	SALKPEIGLKY			955. 2-oxoglutarate dehydrogenase E1 component [Pseudomonas sp. HPB0071]			YP_001553076.1 GI	160873760
gi	269796764	ref	YP_003316219.1		5.5296e-11	35.7	LASVPELRGLY			298. acyl dehydratase [Sanguibacter keddieii DSM 10542]
gi	444725625	gb	ELW66186.1		5.4648e-11	42.9	LTVAPEVAPGW			614. Solute carrier family 12 member 3 [Tupaia chinensis]		160902197	185. permease [Petrotoga mobilis SJ95]
gi	226365787	ref	YP_002783570.1		5.37293e-11	50	RASSPELAGAF			257. phosphomannomutase/phosphoglucomutase [Rhodococcus opacus B4]			337 aa protein
gi	313122584	ref	YP_004044511.1		5.37293e-11	42.9	RAYAPELGGAF			383. siderophore synthetase component [Halogeometricum borinquense DSM 11551]			YP_001567778.1 GI	160902197
gi	326679479	ref	XP_686649.4		5.34336e-11	35.7	WTGSPEILLKY
gi	491158241	ref	WP_005016628.1		5.26608e-11	42.9	EAYYPEIPQVF			755. MULTISPECIES		161504078	186. hypothetical protein SARI_02171 [Salmonella enterica subsp. arizonae serovar 62	z4,z23	- str. RSK2980]
gi	490716810	ref	WP_004579375.1		5.25463e-11	50	SAVYPEVAEGF			745. branched chain amino acid ABC transporter substrate-binding protein [Marinobacter nanhaiticus]			451 aa protein
gi	449489473	ref	XP_004176750.1		5.24621e-11	28.6	ATSVPELGESW			622. PREDICTED			YP_001571190.1 GI	161504078
gi	507104604	emb	CCH10191.1		5.20736e-11	42.9	RALTPELLLGF			971. two component response regulator [Achromobacter xylosoxidans NH44784-1996]
gi	390946513	ref	YP_006410273.1		5.20502e-11	57.1	RAFAPEVLDSF			532. alpha-amylase/alpha-mannosidase [Alistipes finegoldii DSM 17242]		162452864	187. sigma-54 dependent transcriptional regulator [Sorangium cellulosum So ce56]
gi	496465550	ref	WP_009174395.1		5.16432e-11	42.9	AALAPELKQRF			905. membrane protein, partial [Neisseria sp. oral taxon 014]			477 aa protein
gi	403223372	dbj	BAM41503.1		5.14906e-11	35.7	ATGVPELLAKF			565. conserved hypothetical protein [Theileria orientalis strain Shintoku]			YP_001615231.1 GI	162452864
gi	242787360	ref	XP_002480991.1		5.103e-11	28.6	ESSTPELREGY			266. VPS9 domain protein, putative [Talaromyces stipitatus ATCC 10500]
gi	488306923	ref	WP_002377135.1		5.08723e-11	42.9	KTVVPEVGDIY			692. hypothetical protein [Enterococcus faecalis]		166240097	188. origin recognition complex subunit 3 [Dictyostelium discoideum AX4]
gi	296129575	ref	YP_003636825.1		5.02281e-11	42.9	GASAPEIGEVF			328. 6-phosphogluconate dehydrogenase [Cellulomonas flavigena DSM 20109]			1080 aa protein
gi	256374362	ref	YP_003098022.1		5.01677e-11	42.9	AALKPELAQLF			280. SARP family transcriptional regulator [Actinosynnema mirum DSM 43827]			XP_646765.2 GI	166240097
gi	388851572	emb	CCF54762.1		5.01677e-11	50	EALKPEVGGLF			524. uncharacterized protein UHOR_01534 [Ustilago hordei]
gi	493632465	ref	WP_006584340.1		5.0112e-11	42.9	ESLSPEVLGLY					166408944	189. flavohemoglobin [Botrytis cinerea]
gi	459287247	ref	YP_007510404.1		4.96109e-11	35.7	AALAPELAESW			635. putative ABC transporter periplasmic binding protein [Bradyrhizobium oligotrophicum S58]			412 aa protein
gi	392558030	gb	EIW51292.1		4.86e-11	35.7	LSVAPEVRAKY			540. hypothetical protein TRAVEDRAFT_137632 [Trametes versicolor FP-101664 SS1]			CAP74387.1 GI	166408944
gi	498475490	ref	WP_010779812.1		4.83042e-11	57.1	VAFTPEVKARF			954. calcium-translocating P-type ATPase, PMCA-type [Enterococcus gilvus]
gi	296394822	ref	YP_003659706.1		4.82003e-11	42.9	EALTPELLDRF			330. amino acid adenylation domain-containing protein [Segniliparus rotundus DSM 44985]		166917908	190. gag protein, partial [Human immunodeficiency virus 1]
gi	302866931	ref	YP_003835568.1		4.76045e-11	35.7	VTVTPEVLDRW			361. amino acid adenylation domain-containing protein [Micromonospora aurantiaca ATCC 27029]			148 aa protein
gi	375259923	ref	YP_005019093.1		4.71997e-11	35.7	ATGHPELGLLF			488. hypothetical protein KOX_15650 [Klebsiella oxytoca KCTC 1686]			ABZ03807.1 GI	166917908
gi	491147342	ref	WP_005005740.1		4.70016e-11	42.9	SAVSPELKDVY			754. MULTISPECIES
gi	502109379	ref	XP_004493631.1		4.67775e-11	28.6	ESGTPEILEKY			961. PREDICTED		167032804	191. class III aminotransferase [Pseudomonas putida GB-1]
gi	330467028	ref	YP_004404771.1		4.61736e-11	42.9	RAGAPEIAGSF			413. P-type (transporting) HAD superfamily ATPase [Verrucosispora maris AB-18-032]			436 aa protein
gi	71022605	ref	XP_761532.1		4.59994e-11	42.9	RAIRPEVLALW			54. GBA4.USTMA Guanine nucleotide-binding protein alpha-4 subunit [Ustilago maydis 521]			YP_001668035.1 GI	167032804
gi	1421799	gb	AAB03873.1		4.5951e-11	35.7	NSVKPELLQSF			5. F1-ATPase alpha subunit (mitochondrion) [Petunia axillaris subsp. parodii]
gi	340515793	gb	EGR46045.1		4.56192e-11	42.9	WAGSPELRAVY			443. predicted protein [Trichoderma reesei QM6a]		167583568	192. conserved hypothetical protein [Enterobacteria phage Phieco32]
gi	187479309	ref	YP_787334.1		4.4352e-11	28.6	ASVTPELGQAW			208. membrane protein [Bordetella avium 197N]			250 aa protein
gi	320335872	ref	YP_004172583.1		4.3159e-11	50	GALHPEVAAAF			393. phenylalanyl-tRNA synthetase subunit beta [Deinococcus maricopensis DSM 21211]			YP_001671758.1 GI	167583568
gi	493674682	ref	WP_006624990.1		4.293e-11	42.9	VSSSPEIGESF			807. MULTISPECIES
gi	428207570	ref	YP_007091923.1		4.2504e-11	35.7	ETCSPEIAARW			594. amino acid adenylation protein [Chroococcidiopsis thermalis PCC 7203]		167646361	193. AraC family transcriptional regulator [Caulobacter sp. K31]
gi	494022181	ref	WP_006964450.1		4.21286e-11	50	ETISPEVAALF			823. arginine utilization regulatory protein RocR [Desulfotignum phosphitoxidans]			323 aa protein
gi	490036258	ref	WP_003938681.1		4.18176e-11	35.7	AAGYPEIAAAW			726. hypothetical protein [Rhodococcus ruber]			YP_001684024.1 GI	167646361
gi	497793977	ref	WP_010108161.1		4.09805e-11	35.7	ATLSPELLGLY
gi	331695294	ref	YP_004331533.1		4.0297e-11	50	RAVSPELGELF			416. ferredoxin--NAD(+) reductase [Pseudonocardia dioxanivorans CB1190]		169237510	194. hypothetical protein OE5265F [Halobacterium salinarum R1]
gi	148225208	ref	NP_001089693.1		4.01856e-11	35.7	GAYHPEIPGRY			138. O(6)-methylguanine-induced apoptosis 2 [Xenopus laevis]			549 aa protein
gi	148676017	gb	EDL07964.1		3.84192e-11	42.9	LALHPEVPGLY			146. coiled-coil domain containing 3, isoform CRA_b [Mus musculus]			YP_001690714.1 GI	169237510
gi	118489593	gb	ABK96598.1		3.816e-11	42.9	VSYSPEIAASF			87. unknown [Populus trichocarpa x Populus deltoides]
gi	451949121	ref	YP_007469716.1		3.816e-11	42.9	ESCSPELLQAF			630. hypothetical protein UWK_03548 [Desulfocapsa sulfexigens DSM 10523]		169627461	195. Conserved hypothetical protein [Mycobacterium abscessus]
gi	493466087	ref	WP_006421267.1		3.816e-11	42.9	VSVYPELLPLF			798. hypothetical protein [delta proteobacterium NaphS2]			189 aa protein
gi	495099658	ref	WP_007824481.1		3.7584e-11	35.7	VSLSPELAAAY			858. hypothetical protein [Streptomyces sp. Tu6071]			YP_001701110.1 GI	169627461
gi	297624429	ref	YP_003705863.1		3.69967e-11	35.7	ESLTPEVLESY			336. alpha/beta hydrolase fold protein [Truepera radiovictrix DSM 17093]
gi	283784612	ref	YP_003364477.1		3.69389e-11	50	AAGYPEVGLLF			305. hypothetical protein ROD_08551 [Citrobacter rodentium ICC168]		170581054	196. hypothetical protein [Brugia malayi]
gi	493317185	ref	WP_006274559.1		3.69389e-11	50	EAVRPEVLDFF			785. glycyl-tRNA synthetase subunit beta [Asticcacaulis biprosthecium]			487 aa protein
gi	405958289	gb	EKC24431.1		3.67488e-11	50	VALSPEVRAGW			570. Histone-lysine N-methyltransferase MLL3 [Crassostrea gigas]			XP_001895519.1 GI	170581054
gi	45198743	ref	NP_985772.1		3.60806e-11	57.1	KALSPEVLEKY			39. AFR225Wp [Ashbya gossypii ATCC 10895]
gi	489945854	ref	WP_003849161.1		3.59251e-11	42.9	EAVTPEVAEAW			723. hemoglobin flavoprotein [Corynebacterium ammoniagenes]		170739204	197. AMP-dependent synthetase and ligase [Methylobacterium sp. 4-46]
gi	365960991	ref	YP_004942558.1		3.5904e-11	35.7	LAGKPEILDLY			478. hypothetical protein FCOL_09780 [Flavobacterium columnare ATCC 49512]			517 aa protein
gi	496588017	ref	WP_009286645.1		3.54816e-11	35.7	EAVTPEIADAW			911. MULTISPECIES			YP_001767859.1 GI	170739204
gi	284030770	ref	YP_003380701.1		3.52176e-11	35.7	LALAPELPAGW			307. glycosyl hydrolase family 98 putative carbohydrate binding module [Kribbella flavida DSM 17836]
gi	380482954	emb	CCF40917.1		3.45825e-11	35.7	YSSAPEILQYF			503. steroid monooxygenase [Colletotrichum higginsianum]		170743699	198. FAD linked oxidase domain-containing protein [Methylobacterium sp. 4-46]
gi	471571962	gb	EMR70578.1		3.45825e-11	35.7	YSSAPEILAYF			664. putative flavin-binding monooxygenase protein [Eutypa lata UCREL1]			1020 aa protein
gi	488249407	ref	WP_002320615.1		3.4344e-11	42.9	AAVAPEIKESF			690. acetyl esterase [Enterococcus faecium]			YP_001772354.1 GI	170743699
gi	488903357	ref	WP_002814434.1		3.4344e-11	50	AACAPELAPVF			705. hypothetical protein [Xanthomonas fragariae]
gi	496400376	ref	WP_009109366.1		3.36168e-11	28.6	VTLTPELKAAY			899. DHH family phosphoesterase [Desulfovibrio sp. U5L]		170782101	199. hypothetical protein CMS_1726 [Clavibacter michiganensis subsp. sepedonicus]
gi	326499940	dbj	BAJ90805.1		3.339e-11	35.7	VSYTPEIAASF			409. predicted protein [Hordeum vulgare subsp. vulgare]			225 aa protein
gi	388513569	gb	AFK44846.1		3.26563e-11	35.7	NTLSPELAAKY			522. unknown [Lotus japonicus]			YP_001710434.1 GI	170782101
gi	326929784	ref	XP_003211036.1		3.25018e-11	42.9	VTYSPELLDMY
gi	159488935	ref	XP_001702456.1		3.1944e-11	42.9	YASRPEIGPFW			181. predicted protein [Chlamydomonas reinhardtii]		171060055	200. molybdopterin oxidoreductase [Leptothrix cholodnii SP-6]
gi	302342565	ref	YP_003807094.1		3.15706e-11	35.7	AALTPELLEAY			358. DNA topoisomerase I [Desulfarculus baarsii DSM 2075]			707 aa protein
gi	490053499	ref	WP_003955816.1		3.14237e-11	42.9	VAGTPEIGLRF			728. protein-L-isoaspartate O-methyltransferase [Streptomyces clavuligerus]			YP_001792404.1 GI	171060055
gi	506934038	ref	YP_008014476.1		3.13632e-11	35.7	VAIRPEIAGFY			967. hypothetical protein AORI_5490 [Amycolatopsis orientalis HCCB10007]
gi	386363259	ref	YP_006072590.1		3.0912e-11	35.7	KTVTPEIKALY			514. ribosome maturation factor rimP [Streptococcus pyogenes Alab49]		182414774	201. glycoside hydrolase family 42 [Opitutus terrae PB90-1]
gi	494839607	ref	WP_007565707.1		3.07824e-11	50	RAVSPEIAQFF			851. FAD-dependent pyridine nucleotide-disulfide oxidoreductase [Methylobacterium sp. GXF4]			571 aa protein
gi	284031113	ref	YP_003381044.1		3.03923e-11	50	AAYSPELGGRF			308. IucA/IucC family protein [Kribbella flavida DSM 17836]			YP_001819840.1 GI	182414774
gi	308182045	ref	YP_003926173.1		3.01655e-11	50	EAFKPELAAVF			371. acetylesterase [Lactobacillus plantarum subsp. plantarum ST-III]
gi	304314165	ref	YP_003849312.1		2.91456e-11	28.6	ETIHPELRQIW			365. hypothetical protein MTBMA_c03980 [Methanothermobacter marburgensis str. Marburg]		183220360	202. hypothetical protein LEPBI_I0956 [Leptospira biflexa serovar Patoc strain 'Patoc 1 (Paris)']
gi	226312781	ref	YP_002772675.1		2.90122e-11	35.7	LTSKPELLQRF			254. malonyl-CoA transacylase [Brevibacillus brevis NBRC 100599]			289 aa protein
gi	269837971	ref	YP_003320199.1		2.86157e-11	35.7	ATIVPEVAQLY			299. NAD(P)(+) transhydrogenase [Sphaerobacter thermophilus DSM 20745]			YP_001838356.1 GI	183220360
gi	399218530	emb	CCF75417.1		2.83046e-11	42.9	GAISPELLERY			554. unnamed protein product [Babesia microti strain RI]
gi	160902197	ref	YP_001567778.1		2.76787e-11	50	KAIKPELLALF			185. permease [Petrotoga mobilis SJ95]		183220643	203. hypothetical protein LEPBI_I1251 [Leptospira biflexa serovar Patoc strain 'Patoc 1 (Paris)']
gi	392402766	ref	YP_006439378.1		2.75616e-11	35.7	AALAPELRLGY			536. hypothetical protein Turpa_1224 [Turneriella parva DSM 21527]			298 aa protein
gi	197116403	ref	YP_002136830.1		2.74752e-11	50	KASYPEIGEKF			224. chromosomal replication initiation protein [Geobacter bemidjiensis Bem]			YP_001838639.1 GI	183220643
gi	1017427	emb	CAA62189.1		2.7104e-11	42.9	VAGTPELKPKW			4. elastic titin, partial [Homo sapiens]
gi	493169724	ref	WP_006173181.1		2.6928e-11	28.6	SSSAPELGGGW			783. oxidoreductase [Synechococcus sp. WH 5701]		183985130	204. hypothetical protein MMAR_5160 [Mycobacterium marinum M]
gi	120404014	ref	YP_953843.1		2.68646e-11	50	AAGSPELAAAF			98. dienelactone hydrolase [Mycobacterium vanbaalenii PYR-1]			272 aa protein
gi	302035575	ref	YP_003795897.1		2.6712e-11	50	LAIHPEVKARF			356. cytochrome P450 [Candidatus Nitrospira defluvii]			YP_001853421.1 GI	183985130
gi	494614651	ref	WP_007372896.1		2.6712e-11	57.1	LACSPEVAARF			841. siderophore biosynthesis protein [Kosakonia radicincitans]
gi	383454474	ref	YP_005368463.1		2.65498e-11	42.9	YTGAPEVGLGF			504. hypothetical protein COCOR_02477 [Corallococcus coralloides DSM 2259]		184154958	205. hypothetical protein LAF_0482 [Lactobacillus fermentum IFO 3956]
gi	156102985	ref	XP_001617185.1		2.6496e-11	28.6	ETVVPEIKDGY			166. Mitotic apparatus protein p62 [Plasmodium vivax Sal-1]			1164 aa protein
gi	498792176	ref	WP_010837355.1		2.63749e-11	42.9	GALAPELGHFF						YP_001843298.1 GI	184154958
gi	239818183	ref	YP_002947093.1		2.51856e-11	50	LAVRPEVLAAF			261. class III aminotransferase [Variovorax paradoxus S110]
gi	479209897	ref	YP_007837832.1		2.5056e-11	35.7	ASLSPELAQKY			679. hypothetical protein FP2_21820 [Faecalibacterium prausnitzii L2-6]		186681529	206. hydrophobe/amphiphile efflux-1 (HAE1) family protein [Nostoc punctiforme PCC 73102]
gi	334335564	ref	YP_004540716.1		2.48054e-11	42.9	AALRPEVAAAY			430. DNA replication and repair protein RecF [Isoptericola variabilis 225]			1105 aa protein
gi	333978194	ref	YP_004516139.1		2.47277e-11	50	VAVVPEVAEKF			426. hypothetical protein Desku_0731 [Desulfotomaculum kuznetsovii DSM 6115]			YP_001864725.1 GI	186681529
gi	269795107	ref	YP_003314562.1		2.4556e-11	42.9	GAGAPELAAVF			297. orotidine 5'-phosphate decarboxylase, subfamily 2 [Sanguibacter keddieii DSM 10542]
gi	507669493	ref	XP_004708356.1		2.385e-11	35.7	LSSAPEILALF			974. PREDICTED		186685416	207. patatin [Nostoc punctiforme PCC 73102]
gi	145223898	ref	YP_001134576.1		2.35066e-11	42.9	AAGTPELAAAF			120. dienelactone hydrolase [Mycobacterium gilvum PYR-GCK]			391 aa protein
gi	300788881	ref	YP_003769172.1		2.35066e-11	42.9	WAGYPELAQRF			350. hydrogenobyrinic acid a,c-diamide synthase [Amycolatopsis mediterranei U32]			YP_001868612.1 GI	186685416
gi	219117837	ref	XP_002179706.1		2.26195e-11	42.9	SAVTPEVAAAW			241. predicted protein [Phaeodactylum tricornutum CCAP 1055/1]
gi	428320444	ref	YP_007118326.1		2.20968e-11	50	LAFRPEVLAAY			596. FG-GAP repeat protein [Oscillatoria nigro-viridis PCC 7112]		187479309	208. membrane protein [Bordetella avium 197N]
gi	479170753	ref	YP_007798940.1		2.1924e-11	28.6	ASLTPELAQKY			676. hypothetical protein [Faecalibacterium prausnitzii SL3/3]			323 aa protein
gi	493401225	ref	WP_006357323.1		2.1289e-11	42.9	EAVTPEVADAW			792. hemin transporter [Gordonia alkanivorans]			YP_787334.1 GI	187479309
gi	485916109	gb	EOD43520.1		2.0736e-11	35.7	ASYHPEVAGLY			686. putative ergosterol biosynthesis protein [Neofusicoccum parvum UCRNP2]
gi	78776372	ref	YP_392687.1		2.07018e-11	57.1	LAFTPEVAASF			58. DNA topoisomerase I [Sulfurimonas denitrificans DSM 1251]		187736353	209. Alpha-glucosidase [Akkermansia muciniphila ATCC BAA-835]
gi	485921722	gb	EOD47368.1		2.06712e-11	35.7	YASAPEILEYW			687. putative flavin-binding monooxygenase protein [Neofusicoccum parvum UCRNP2]			798 aa protein
gi	494589676	ref	WP_007348270.1		2.01485e-11	42.9	AAIYPELAAFF			839. ATPase AAA [Marinobacter sp. ELB17]			YP_001878465.1 GI	187736353
gi	488729222	ref	WP_002652651.1		1.9872e-11	28.6	ETIVPEIKQKY			698. biotin synthase [Blastopirellula marina]
gi	319786818	ref	YP_004146293.1		1.95955e-11	42.9	YAYTPEVAEAY			388. outer membrane autotransporter barrel domain-containing protein [Pseudoxanthomonas suwonensis 11-1]		187922026	210. hypothetical protein Bphyt_7401 [Burkholderia phytofirmans PsJN]
gi	270001289	gb	EEZ97736.1		1.9309e-11	42.9	ATVAPEVGLKF			300. protocadherin 15 [Tribolium castaneum]			166 aa protein
gi	492586917	ref	WP_005895664.1		1.91678e-11	35.7	EALKPELGEAY						YP_001893615.1 GI	187922026
gi	226945307	ref	YP_002800380.1		1.89235e-11	35.7	AAVTPELLDAW			258. AraC family transcriptional regulator [Azotobacter vinelandii DJ]
gi	496826842	ref	WP_009375675.1		1.88892e-11	50	LAGYPEVLHVF			915. hypothetical protein [Halogranum salarium]		187928250	211. methyltransferase FkbM family protein [Ralstonia pickettii 12J]
gi	321452148	gb	EFX63608.1		1.82829e-11	42.9	VAGTPELLDRF			396. hypothetical protein DAPPUDRAFT_119070 [Daphnia pulex]			879 aa protein
gi	206891047	ref	YP_002248642.1		1.82822e-11	28.6	VTVAPELPGAY			231. N-acetylglucosamine-6-phosphate deacetylase [Thermodesulfovibrio yellowstonii DSM 11347]			YP_001898737.1 GI	187928250
gi	490082246	ref	WP_003984297.1		1.82213e-11	35.7	EALKPELAQRW
gi	497926945	ref	WP_010241101.1		1.82213e-11	35.7	EALKPELAARW					187930863	212. hypothetical protein Rpic_4988 [Ralstonia pickettii 12J]
gi	160873760	ref	YP_001553076.1		1.77725e-11	50	KAGKPEVALSY			184. transposase IS66 [Shewanella baltica OS195]			262 aa protein
gi	488846580	ref	WP_002758986.1		1.764e-11	28.6	ASYTPEILARY			704. hypothetical protein [Microcystis aeruginosa]			YP_001901349.1 GI	187930863
gi	408677217	ref	YP_006877044.1		1.76299e-11	50	WAGAPEVAARF			581. Cobyrinic acid A,C-diamide synthase [Streptomyces venezuelae ATCC 10712]
gi	491461320	ref	WP_005319096.1		1.76299e-11	50	WASRPEVAARF					188575627	213. transposase TnpA, ISL3 family [Xanthomonas oryzae pv. oryzae PXO99A]
gi	218246664	ref	YP_002372035.1		1.75536e-11	35.7	VTSVPEILAAF			238. hypothetical protein PCC8801_1836 [Cyanothece sp. PCC 8801]			472 aa protein
gi	299751655	ref	XP_002911667.1		1.75536e-11	42.9	YTSAPELAPLF			344. hypothetical protein CC1G_14200 [Coprinopsis cinerea okayama7#130]			YP_001912556.1 GI	188575627
gi	460385203	ref	XP_004238294.1		1.72666e-11	35.7	KTVKPELPQGY			639. PREDICTED
gi	491611114	ref	WP_005468672.1		1.71418e-11	57.1	KAFYPEVGDKY			763. hypothetical protein [Porphyromonas catoniae]		188993943	214. hypothetical protein PGN_0079 [Porphyromonas gingivalis ATCC 33277]
gi	325963536	ref	YP_004241442.1		1.71072e-11	42.9	LAGVPEVAAAY			408. hypothetical protein Asphe3_21550 [Arthrobacter phenanthrenivorans Sphe3]			345 aa protein
gi	159902726	ref	YP_001550070.1		1.69685e-11	35.7	VTLAPELLGSF			182. N-acetylglucosamine-6-phosphate deacetylase [Prochlorococcus marinus str. MIT 9211]			YP_001928195.1 GI	188993943
gi	347359806	ref	YP_387284.2		1.68432e-11	35.7	VALRPELKAGW			459. hypothetical protein [Desulfovibrio alaskensis G20]
gi	429860828	gb	ELA35547.1		1.67904e-11	42.9	LAGAPELGMGF			599. zn 2cys6 transcription factor [Colletotrichum gloeosporioides Nara gc5]		189218644	215. hypothetical protein Minf_0632 [Methylacidiphilum infernorum V4]
gi	493589310	ref	WP_006542228.1		1.6727e-11	50	KASAPEVLLAW						582 aa protein
gi	255939057	ref	XP_002560298.1		1.6524e-11	28.6	SSIAPELAAKY			277. Pc15g00720 [Penicillium rubens Wisconsin 54-1255]			YP_001939285.1 GI	189218644
gi	498230230	ref	WP_010544386.1		1.63982e-11	42.9	GAVKPEIGQRF
gi	322417546	ref	YP_004196769.1		1.62816e-11	50	KASYPEIGDKF			400. chromosomal replication initiator protein DnaA [Geobacter sp. M18]		189347945	216. PIN domain-containing protein [Chlorobium limicola DSM 245]
gi	489229347	ref	WP_003137696.1		1.62624e-11	35.7	LAGTPELLDFY			709. Hypothetical protein [Lactococcus raffinolactis]			168 aa protein
gi	296005005	ref	XP_002808843.1		1.58976e-11	35.7	ETVVPEVKDGY			323. conserved Plasmodium protein, unknown function [Plasmodium falciparum 3D7]			YP_001944474.1 GI	189347945
gi	402220835	gb	EJU00905.1		1.57982e-11	42.9	AASAPELPEGF			559. hypothetical protein DACRYDRAFT_89364 [Dacryopinax sp. DJM-731 SS1]
gi	494473752	ref	WP_007263230.1		1.57982e-11	50	AAVAPEVPAVF			832. hypothetical protein, partial [Streptomyces sp. C]		191639588	217. alpha-glucosidase [Lactobacillus casei BL23]
gi	490093715	ref	WP_003995635.1		1.55693e-11	50	SAYAPEVGAAF						560 aa protein
gi	226226985	ref	YP_002761091.1		1.5264e-11	50	LAVHPEVRALF			253. lysyl-tRNA synthetase [Gemmatimonas aurantiaca T-27]			YP_001988754.1 GI	191639588
gi	494481035	ref	WP_007270511.1		1.5264e-11	42.9	ESISPELGAIF			834. L-threonine 3-dehydrogenase [Arthrobacter gangotriensis]
gi	399117552	emb	CCE35437.1		1.52064e-11	42.9	AAIVPELLPFY			553. apocytochrome b (mitochondrion) [Claviceps purpurea]		193699903	218. PREDICTED	E3 ubiquitin-protein ligase listerin [Acyrthosiphon pisum]
gi	289551722	ref	YP_003472626.1		1.46322e-11	42.9	SALTPELLAKF			312. von Willebrand factor A [Staphylococcus lugdunensis HKU09-01]			1622 aa protein
gi	310819759	ref	YP_003952117.1		1.44817e-11	42.9	ETGAPEVAALF			376. hypothetical protein STAUR_2486 [Stigmatella aurantiaca DW4/3-1]			XP_001950973.1 GI	193699903
gi	212527068	ref	XP_002143691.1		1.4256e-11	42.9	KSGHPEVLHAY			235. protein serine/threonine kinase (Ran1), putative [Talaromyces marneffei ATCC 18224]
gi	347757116	ref	YP_004864678.1		1.39531e-11	42.9	VALRPEVAESY			461. hypothetical protein MICA_331 [Micavibrio aeruginosavorus ARL-13]		194097542	219. putative lytic transglycosylase [Lactococcus phage bIBB29]
gi	375140140	ref	YP_005000789.1		1.39392e-11	35.7	EAVRPEIADSW			486. hypothetical protein [Mycobacterium rhodesiae NBB3]			194 aa protein
gi	378718998	ref	YP_005283887.1		1.38235e-11	42.9	VTVTPEVLEGF			495. hypothetical protein GPOL_c35090 [Gordonia polyisoprenivorans VH2]			YP_002004010.1 GI	194097542
gi	493810991	ref	WP_006758698.1		1.3608e-11	35.7	ASSVPEVAARY			812. phosphopantetheine-binding [Burkholderia ambifaria]
gi	493390325	ref	WP_006346494.1		1.34673e-11	42.9	VAGAPEIGLRF			790. protein-L-isoaspartate O-methyltransferase [Streptomyces tsukubaensis]		194701456	220. unknown [Zea mays]
gi	490457667	ref	WP_004328397.1		1.34323e-11	50	RAYAPEVLDSF			739. alpha-amylase [Alistipes putredinis CAG			374 aa protein
gi	497464105	ref	WP_009778303.1		1.34323e-11	42.9	WAGHPELAMSF						ACF84812.1 GI	194701456
gi	491411071	ref	WP_005268877.1		1.3356e-11	35.7	ESITPELGAIF			759. L-threonine 3-dehydrogenase [Arthrobacter crystallopoietes]
gi	493777611	ref	WP_006726062.1		1.2879e-11	35.7	VSVAPELLESF			810. pyridoxine biosynthesis protein [Agrobacterium albertimagni]		195113711	221. GI10778 [Drosophila mojavensis]
gi	343084234	ref	YP_004773529.1		1.28304e-11	35.7	LAGAPELLEAY			450. hypothetical protein [Cyclobacterium marinum DSM 745]			764 aa protein
gi	493351596	ref	WP_006308267.1		1.28304e-11	35.7	LAGHPELAEAY			789. hypothetical protein [Facklamia languida]			XP_002001411.1 GI	195113711
gi	506932198	ref	YP_008012636.1		1.27181e-11	35.7	VAVVPELPGAY			965. beta-lactamase class C [Amycolatopsis orientalis HCCB10007]
gi	320583651	gb	EFW97864.1		1.26324e-11	35.7	LALRPELLLSY					196001369	222. hypothetical protein TRIADDRAFT_50060 [Trichoplax adhaerens]
gi	15600887	ref	NP_232517.1		1.2173e-11	42.9	EALYPELAAFF			18. clpB protein [Vibrio cholerae O1 biovar El Tor str. N16961]			1332 aa protein
gi	489600667	ref	WP_003505109.1		1.20285e-11	35.7	VSVAPEVGEFY			716. hypothetical protein [[Clostridium] symbiosum]			XP_002110552.1 GI	196001369
gi	158312528	ref	YP_001505036.1		1.1979e-11	42.9	RAGRPEIGPGY			172. putative alkylated DNA repair protein [Frankia sp. EAN1pec]
gi	478687657	ref	YP_007744467.1		1.19398e-11	50	RAYSPELGGSF			675. Siderophore synthetase superfamily, group A @ Siderophore synthetase large component, acetyltransferase [Streptomyces albus J1074]		197106384	223. pass1-related protein [Phenylobacterium zucineum HLK1]
gi	107029180	ref	YP_626275.1		1.188e-11	28.6	VSSAPELRAGW			70. ABC transporter related [Burkholderia cenocepacia AU 1054]			343 aa protein
gi	256389974	ref	YP_003111538.1		1.16582e-11	42.9	VAVYPELAGMW			283. histidine kinase [Catenulispora acidiphila DSM 44928]			YP_002131761.1 GI	197106384
gi	198283729	ref	YP_002220050.1		1.16127e-11	28.6	RTVKPEILAVY			226. hypothetical protein Lferr_1621 [Acidithiobacillus ferrooxidans ATCC 53993]
gi	339500133	ref	YP_004698168.1		1.13546e-11	28.6	NTSAPELGLSW			438. hypothetical protein Spica_1516 [Treponema caldaria DSM 7334]		197116403	224. chromosomal replication initiation protein [Geobacter bemidjiensis Bem]
gi	509154428	ref	YP_008074668.1		1.10664e-11	50	LALYPEVGAKF			984. pyruvate carboxylase subunit B PycB [Methanobrevibacter sp. AbM4]			458 aa protein
gi	495705089	ref	WP_008429668.1		1.1051e-11	28.6	GTVTPELAHSW			884. ABC transporter substrate-binding protein [Planococcus donghaensis]			YP_002136830.1 GI	197116403
gi	493777093	ref	WP_006725549.1		1.09901e-11	57.1	KAVAPEVAAAF			809. hydrolase [Agrobacterium albertimagni]
gi	256371125	ref	YP_003108949.1		1.06848e-11	50	LAVTPEVAGGF			279. metal ion transporter, nramp family protein [Acidimicrobium ferrooxidans DSM 10331]		197244382	225. lasalocid modular polyketide synthase [Streptomyces lasaliensis]
gi	15800600	ref	NP_286614.1		1.02608e-11	42.9	AAGHPEIGLLF			22. hypothetical protein Z1075 [Escherichia coli O157			5469 aa protein
gi	393222015	gb	EJD07499.1		1.02173e-11	50	NASTPEVAHVF			543. hypothetical protein FOMMEDRAFT_73874 [Fomitiporia mediterranea MF3/22]			CAQ64687.1 GI	197244382
gi	493251869	ref	WP_006219733.1		1.01421e-11	42.9	GTVSPELLAIF
gi	207739375	ref	YP_002257768.1		1.01376e-11	35.7	AASVPELRQGW			232. atp-binding protein [Ralstonia solanacearum IPO1609]		198283729	226. hypothetical protein Lferr_1621 [Acidithiobacillus ferrooxidans ATCC 53993]
gi	29611370	gb	AAO91881.1		1.00742e-11	50	RAIAPEVGGGF			35. large subunit aldehyde oxidoreductase, partial [uncultured bacterium]			285 aa protein
gi	490029877	ref	WP_003932354.1		1.00742e-11	42.9	AAGAPELAAAF			725. dienelactone hydrolase [Mycobacterium vaccae]			YP_002220050.1 GI	198283729
gi	145595673	ref	YP_001159970.1		9.83664e-12	28.6	RTVAPELGELY			128. sigma-70 region 4 domain-containing protein [Salinispora tropica CNB-440]
gi	494723838	ref	WP_007459704.1		9.83664e-12	35.7	AAGAPELPEGY					198284033	227. phosphonate C-P lyase system protein PhnH [Acidithiobacillus ferrooxidans ATCC 53993]
gi	490332499	ref	WP_004221921.1		9.79968e-12	42.9	YALSPELAQLW			737. transcriptional regulator [Bifidobacterium pseudocatenulatum]			180 aa protein
gi	490139991	ref	WP_004040345.1		9.77592e-12	35.7	VTVTPEVPAGW			736. bacterial surface protein 26-residue [Lactobacillus sp. ASF360]			YP_002220354.1 GI	198284033
gi	338211820	ref	YP_004655873.1		9.6048e-12	42.9	LTLSPEVLAKY			435. aspartyl/glutamyl-tRNA amidotransferase subunit B [Runella slithyformis DSM 19594]
gi	497514234	ref	WP_009828432.1		9.504e-12	42.9	WSVSPEVGLGY			928. hypothetical protein [Rhodobacteraceae bacterium HTCC2083]		198416373	228. PREDICTED	protein SDA1 homolog isoform X1 [Ciona intestinalis]
gi	301097535	ref	XP_002897862.1		9.4976e-12	50	KAVTPELKAKF			354. conserved hypothetical protein [Phytophthora infestans T30-4]			678 aa protein
gi	494030745	ref	WP_006972884.1		9.4864e-12	35.7	LAGTPELLARW			825. hypothetical protein [Plesiocystis pacifica]			XP_002127211.1 GI	198416373
gi	493873612	ref	WP_006820059.1		9.396e-12	28.6	VSLYPELLQAY
gi	479337363	ref	YP_007848581.1		9.36192e-12	50	ETVSPEVLDGF			680. adenosylmethionine-8-amino-7-oxononanoate aminotransferase apoenzyme [ [[Clostridium] cf. saccharolyticum K10]		198423670	229. PREDICTED	uncharacterized protein LOC100177894 [Ciona intestinalis]
gi	194097542	ref	YP_002004010.1		9.18e-12	35.7	SSVSPEIAASY			219. putative lytic transglycosylase [Lactococcus phage bIBB29]			359 aa protein
gi	220907136	ref	YP_002482447.1		9.1584e-12	50	YAIHPEVRAKF			243. DNA methylase N-4/N-6 domain-containing protein [Cyanothece sp. PCC 7425]			XP_002129832.1 GI	198423670
gi	497941274	ref	WP_010255430.1		9.1584e-12	50	LASVPEVAALF			940. hypothetical protein [Myroides injenensis]
gi	156049857	ref	XP_001590895.1		9.072e-12	28.6	ASSTPELLGVY			165. hypothetical protein SS1G_08636 [Sclerotinia sclerotiorum 1980 UF-70]		206598151	230. hypothetical protein [Bodo saltans]
gi	152984326	ref	YP_001348454.1		8.904e-12	57.1	LACSPEVGARF			156. iron transporter [Pseudomonas aeruginosa PA7]			926 aa protein
gi	408682200	ref	YP_006882027.1		8.904e-12	50	LACTPEVLGGF			582. membrane translocator [Streptomyces venezuelae ATCC 10712]			ACI15958.1 GI	206598151
gi	407685205	ref	YP_006800379.1		8.74368e-12	28.6	ATIAPELAQSW			577. hypothetical protein AMEC673_16600 [Alteromonas macleodii str. 'English Channel 673']
gi	146302015	ref	YP_001196606.1		8.6496e-12	42.9	NASVPELKASF			130. short-chain dehydrogenase/reductase SDR [Flavobacterium johnsoniae UW101]		206891047	231. N-acetylglucosamine-6-phosphate deacetylase [Thermodesulfovibrio yellowstonii DSM 11347]
gi	470459512	ref	XP_004341364.1		8.613e-12	28.6	VSVRPELLAYY			656. acetyltransferase, GNAT family protein [Acanthamoeba castellanii str. Neff]			275 aa protein
gi	189347945	ref	YP_001944474.1		8.60706e-12	35.7	ETGTPEVLEKY			216. PIN domain-containing protein [Chlorobium limicola DSM 245]			YP_002248642.1 GI	206891047
gi	127514606	ref	YP_001095803.1		8.57472e-12	35.7	AALTPELAAIW			117. hypothetical protein Shew_3678 [Shewanella loihica PV-4]
gi	213407910	ref	XP_002174726.1		8.26848e-12	42.9	YASVPEVALYY					207739375	232. atp-binding protein [Ralstonia solanacearum IPO1609]
gi	495537922	ref	WP_008262501.1		7.9924e-12	42.9	GALHPEIGHLF			876. ROK family transcriptional regulator [Brevundimonas sp. BAL3]			541 aa protein
gi	494901445	ref	WP_007627490.1		7.98336e-12	42.9	EAITPEVAAAW			854. hemin transporter [Dietzia cinnamea]			YP_002257768.1 GI	207739375
gi	495618426	ref	WP_008343005.1		7.8016e-12	42.9	ATSSPELKASF			879. MULTISPECIES
gi	494299698	ref	WP_007170222.1		7.6032e-12	42.9	WAGSPEIAAAY					207744480	233. gamma-glutamyltranspeptidase precursor protein [Ralstonia solanacearum IPO1609]
gi	451854938	gb	EMD68230.1		7.55568e-12	42.9	EAIHPELLEFF			628. hypothetical protein COCSADRAFT_270409 [Bipolaris sorokiniana ND90Pr]			626 aa protein
gi	431904384	gb	ELK09769.1		7.5072e-12	50	SAVSPELPPSY			607. Toll/interleukin-1 receptor domain-containing adapter protein [Pteropus alecto]			YP_002260872.1 GI	207744480
gi	495171458	ref	WP_007896254.1		7.3776e-12	50	AALAPELGPSF			862. transporter [Pseudomonas sp. GM102]
gi	495965282	ref	WP_008689861.1		7.1232e-12	42.9	AASTPELKQAF			891. protein containing DUF892 [Rhodopirellula maiorica]		212527022	234. galactokinase [Talaromyces marneffei ATCC 18224]
gi	86605023	ref	YP_473786.1		7.02144e-12	57.1	EAISPEVPASF			61. hypothetical protein CYA_0302 [Synechococcus sp. JA-3-3Ab]			518 aa protein
gi	496782794	ref	WP_009370804.1		6.9696e-12	35.7	RAGAPELKGIY						XP_002143668.1 GI	212527022
gi	494802579	ref	WP_007537987.1		6.71616e-12	50	RASSPELAAAF			847. phosphomannomutase/phosphoglucomutase [Rhodococcus triatomae]
gi	490791655	ref	WP_004653801.1		6.70344e-12	57.1	EAFKPEVGHLF			748. hypothetical protein [Acinetobacter sp. NIPH 809]		212527068	235. protein serine/threonine kinase (Ran1), putative [Talaromyces marneffei ATCC 18224]
gi	410082411	ref	XP_003958784.1		6.678e-12	42.9	YSVTPEVLAKF			583. hypothetical protein KAFR_0H02400 [Kazachstania africana CBS 2517]			416 aa protein
gi	492752005	ref	WP_005950156.1		6.6096e-12	35.7	LAVKPELAEKY			774. hypothetical protein, partial [Blautia hydrogenotrophica]			XP_002143691.1 GI	212527068
gi	186681529	ref	YP_001864725.1		6.5826e-12	42.9	VTSAPEVRASF			206. hydrophobe/amphiphile efflux-1 (HAE1) family protein [Nostoc punctiforme PCC 73102]
gi	224131774	ref	XP_002321175.1		6.44322e-12	28.6	ETLTPELPHGY					217969721	236. LysR family transcriptional regulator [Thauera sp. MZ1T]
gi	496486060	ref	WP_009194630.1		6.43632e-12	42.9	AAGAPELPAGF			908. hypothetical protein [Cesiribacter andamanensis]			301 aa protein
gi	479171164	ref	YP_007799351.1		6.264e-12	35.7	VSLSPELAQKY			677. hypothetical protein [Faecalibacterium prausnitzii SL3/3]			YP_002354955.1 GI	217969721
gi	12963350	gb	AAK11225.1	AF325966_1	6.15648e-12	42.9	VAGVPELGAFF			11. nucleocapsid protein [Andes virus]
gi	489125559	ref	WP_003035356.1		6.15648e-12	50	AAGHPEVGLLF			706. MULTISPECIES		218190977	237. hypothetical protein OsI_07659 [Oryza sativa Indica Group]
gi	226357232	ref	YP_002786972.1		6.05472e-12	42.9	SAYAPELGARF			255. aerobactin siderophore biosynthesis protein [Deinococcus deserti VCD115]			678 aa protein
gi	297625201	ref	YP_003686964.1		6.048e-12	28.6	VSVTPELLGAY			337. transcriptional regulator [Propionibacterium freudenreichii subsp. shermanii CIRM-BIA1]			EEC73404.1 GI	218190977
gi	470239634	ref	XP_004351786.1		5.91192e-12	35.7	STVTPEVAQLY			653. hypothetical protein DFA_09889 [Dictyostelium fasciculatum]
gi	498372333	ref	WP_010686489.1		5.87664e-12	50	RAITPEVGQKF					218246664	238. hypothetical protein PCC8801_1836 [Cyanothece sp. PCC 8801]
gi	1523780	emb	CAA68959.1		5.8464e-12	35.7	VALHPELKMRY			6. putative transposase [Ascobolus immersus]			865 aa protein
gi	493680390	ref	WP_006630583.1		5.74464e-12	42.9	SAVSPELAQLW			808. major facilitator superfamily protein [Halorubrum tebenquichense]			YP_002372035.1 GI	218246664
gi	508153948	gb	EOT30722.1		5.71392e-12	50	AAFSPELLMKY			982. hypothetical protein OMQ_00426 [Enterococcus saccharolyticus ATCC 43076]
gi	334345741	ref	YP_004554293.1		5.67936e-12	42.9	AALKPEVLDSY			431. TonB-dependent receptor [Sphingobium chlorophenolicum L-1]		218247335	239. hypothetical protein PCC8801_2542 [Cyanothece sp. PCC 8801]
gi	114685510	ref	XP_001171406.1		5.65248e-12	35.7	VTYSPELLDLY			76. PREDICTED			535 aa protein
gi	498227350	ref	WP_010541506.1		5.5968e-12	42.9	AASHPELRHFF						YP_002372706.1 GI	218247335
gi	494157027	ref	WP_007096766.1		5.36544e-12	28.6	YTVAPELLEAY			828. hypothetical protein [Kordia algicida]
gi	183985130	ref	YP_001853421.1		5.3592e-12	50	VALTPEVGPSW			204. hypothetical protein MMAR_5160 [Mycobacterium marinum M]		218548369	240. hypothetical protein EFER_0991 [Escherichia fergusonii ATCC 35469]
gi	353238142	emb	CCA70097.1		5.355e-12	28.6	LSSKPELLQRY			465. hypothetical protein PIIN_04037 [Piriformospora indica DSM 11827]			129 aa protein
gi	492740163	ref	WP_005942328.1		5.32224e-12	42.9	AAVTPEVAAAW						YP_002382160.1 GI	218548369
gi	170739204	ref	YP_001767859.1		4.89984e-12	42.9	EALSPELLAAW			197. AMP-dependent synthetase and ligase [Methylobacterium sp. 4-46]
gi	502089683	ref	XP_004488986.1		4.876e-12	35.7	LTVHPELKQSF			960. PREDICTED		219117837	241. predicted protein [Phaeodactylum tricornutum CCAP 1055/1]
gi	496589586	ref	WP_009287692.1		4.82724e-12	42.9	VTGHPEVAALF						426 aa protein
gi	257373009	ref	YP_003175783.1		4.68096e-12	35.7	ETYAPELGGSF			285. IucA/IucC family protein [Halomicrobium mukohataei DSM 12286]			XP_002179706.1 GI	219117837
gi	51245244	ref	YP_065128.1		4.4928e-12	35.7	GAIYPEILGKY			47. glycine-betaine transporter (BetL) [Desulfotalea psychrophila LSv54]
gi	489667770	ref	WP_003572048.1		4.47744e-12	57.1	AAGSPEVGALF					220904783	242. periplasmic binding protein [Desulfovibrio desulfuricans subsp. desulfuricans str. ATCC 27774]
gi	493427104	ref	WP_006382788.1		4.37184e-12	42.9	AAGAPEVPGSY			796. beta-N-Acetylglucosaminidase family protein [Streptomyces turgidiscabies]			345 aa protein
gi	497478323	ref	WP_009792521.1		4.1472e-12	42.9	LAYVPEVAALY			927. MULTISPECIES			YP_002480095.1 GI	220904783
gi	218548369	ref	YP_002382160.1		4.10432e-12	42.9	AAGHPELGLLF			240. hypothetical protein EFER_0991 [Escherichia fergusonii ATCC 35469]
gi	501182384	ref	WP_012225483.1		4.05132e-12	50	GAVTPEVGQRF					220907136	243. DNA methylase N-4/N-6 domain-containing protein [Cyanothece sp. PCC 7425]
gi	148261746	ref	YP_001235873.1		3.9204e-12	35.7	RAGAPEIAAAY			139. DSBA oxidoreductase [Acidiphilium cryptum JF-5]			739 aa protein
gi	432929121	ref	XP_004081191.1		3.9204e-12	35.7	LAGRPELLHVY			608. PREDICTED			YP_002482447.1 GI	220907136
gi	494026828	ref	WP_006969009.1		3.888e-12	28.6	ASVAPELAAAY			824. transcriptional regulator, TetR family protein [Plesiocystis pacifica]
gi	358253471	dbj	GAA53141.1		3.744e-12	42.9	GASSPEIRAKY			471. La-related protein 7 [Clonorchis sinensis]		221632843	244. methylthioadenosine phosphorylase [Thermomicrobium roseum DSM 5159]
gi	331696073	ref	YP_004332312.1		3.4848e-12	35.7	AAVRPEIAASW			417. Fis family sigma-54 specific transcriptional regulator [Pseudonocardia dioxanivorans CB1190]			289 aa protein
gi	507814006	gb	EOS70644.1		3.44448e-12	35.7	GASYPELPDSY			978. hypothetical protein C818_01453, partial [Lachnospiraceae bacterium 3-2]			YP_002522065.1 GI	221632843
gi	508094588	gb	EOT04746.1		3.2648e-12	50	VASSPEIGLRF			980. hypothetical protein K530_06937 [Streptomyces albulus CCRC 11814]
gi	383791315	ref	YP_005475889.1		3.23136e-12	42.9	SAVAPEVGAAW			508. glycine/D-amino acid oxidase, deaminating [Spirochaeta africana DSM 8902]		222053118	245. chromosomal replication initiation protein [Geobacter daltonii FRC-32]
gi	494845516	ref	WP_007571616.1		3.21552e-12	35.7	EALAPELAARW						445 aa protein
gi	193699903	ref	XP_001950973.1		3.14226e-12	42.9	RTSYPEVGHMY			218. PREDICTED			YP_002535480.1 GI	222053118
gi	430740948	ref	YP_007207299.1		3.14226e-12	42.9	VTVRPEVGAMY			601. transposase family protein [Singulisphaera acidiphila DSM 18658]
gi	195113711	ref	XP_002001411.1		2.9808e-12	57.1	EASSPEVPPVY			221. GI10778 [Drosophila mojavensis]		222056293	246. Fis family transcriptional regulator [Geobacter daltonii FRC-32]
gi	116192993	ref	XP_001222309.1		2.79936e-12	42.9	YASVPEVLEAY			81. hypothetical protein CHGG_06214 [Chaetomium globosum CBS 148.51]			471 aa protein
gi	357388203	ref	YP_004903042.1		2.78784e-12	35.7	AAGHPELAAAW			468. hypothetical protein KSE_12530 [Kitasatospora setae KM-6054]			YP_002538655.1 GI	222056293
gi	225464140	ref	XP_002265414.1		2.78208e-12	28.6	ATITPELAAKY			250. PREDICTED
gi	496471717	ref	WP_009180562.1		2.6928e-12	35.7	VAIKPELKLGY			906. succinyl-CoA synthetase [Desulfovibrio sp. FW1012B]		222478957	247. alcohol dehydrogenase zinc-binding domain protein [Halorubrum lacusprofundi ATCC 49239]
gi	494041932	ref	WP_006984054.1		2.67264e-12	50	WAYSPEVGQYY			827. trehalose-6-phosphate hydrolase [Cardiobacterium valvarum]			338 aa protein
gi	494822502	ref	WP_007557910.1		2.5704e-12	35.7	SAVTPEIAAAY			848. hypothetical protein [Bacteroides plebeius]			YP_002565194.1 GI	222478957
gi	157146499	ref	YP_001453818.1		2.5652e-12	42.9	VAGHPEIGLLF			170. hypothetical protein CKO_02259 [Citrobacter koseri ATCC BAA-895]
gi	507631220	ref	XP_004699152.1		2.50096e-12	35.7	EALTPELLARW			973. PREDICTED		223649186	248. Motile sperm domain-containing protein 2 [Salmo salar]
gi	71032263	ref	XP_765773.1		2.38464e-12	35.7	VTVSPELLELY			55. hypothetical protein [Theileria parva strain Muguga]			525 aa protein
gi	377811870	ref	YP_005044310.1		2.36544e-12	35.7	EAITPELLDGW			494. hypothetical protein BYI23_D012770 [Burkholderia sp. YI23]			ACN11351.1 GI	223649186
gi	115387042	ref	XP_001210062.1		2.34048e-12	50	ATVSPEVLQGF			77. predicted protein [Aspergillus terreus NIH2624]
gi	499022445	ref	XP_004561989.1		2.3232e-12	35.7	VAVHPELRLSW			956. PREDICTED		224369428	249. excinuclease ABC subunit C [Desulfobacterium autotrophicum HRM2]
gi	119963295	ref	YP_947233.1		2.226e-12	35.7	ESVTPELGAIF			97. L-threonine 3-dehydrogenase [Arthrobacter aurescens TC1]			606 aa protein
gi	494956750	ref	WP_007682777.1		2.1924e-12	42.9	VALAPELAPRY			855. peptide ABC transporter ATP-binding protein [Novosphingobium sp. AP12]			YP_002603592.1 GI	224369428
gi	375256140	ref	YP_005015307.1		2.16e-12	28.6	ESVHPEIADKY			487. glutaredoxin [Tannerella forsythia ATCC 43037]
gi	460412833	ref	XP_004251802.1		2.16e-12	35.7	VSYSPEIAASY			640. PREDICTED		225464140	250. PREDICTED	uncharacterized protein LOC100244781 [Vitis vinifera]
gi	198284033	ref	YP_002220354.1		2.0988e-12	42.9	RAIAPEIGAGF			227. phosphonate C-P lyase system protein PhnH [Acidithiobacillus ferrooxidans ATCC 53993]			211 aa protein
gi	325107207	ref	YP_004268275.1		2.088e-12	35.7	ESLSPELLAKY			406. galactarate dehydratase [Planctomyces brasiliensis DSM 5305]			XP_002265414.1 GI	225464140
gi	493344002	ref	WP_006300816.1		2.0352e-12	50	LAVHPEVGGLF			788. amino acid ABC transporter permease [Aminomonas paucivorans]
gi	384253629	gb	EIE27103.1		1.8972e-12	42.9	EAFKPEIGHAY			510. hypothetical protein COCSUDRAFT_38859 [Coccomyxa subellipsoidea C-169]		225621275	251. spermidine/putrescine transport ATP-binding protein PotA [Brachyspira hyodysenteriae WA1]
gi	494828897	gb	EON65655.1		1.65888e-12	42.9	YASVPEVLDAY			849. alpha 1,6-mannosyltransferase [Coniosporium apollinis CBS 100218]			400 aa protein
gi	152999153	ref	YP_001364834.1		1.61568e-12	50	KAGKPEVAQSY			158. transposase IS66 [Shewanella baltica OS185]			YP_002722533.1 GI	225621275
gi	388858505	emb	CCF47989.1		1.6146e-12	28.6	GTSAPEILAAY			525. related to nuclear division protein Rft1 [Ustilago hordei]
gi	395330344	gb	EJF62728.1		1.53e-12	28.6	ESSKPEIGGSY			545. hypothetical protein DICSQDRAFT_146391 [Dichomitus squalens LYAD-421 SS1]		226186637	252. probable long-chain fatty-acid--CoA ligase [Rhodococcus erythropolis PR4]
gi	452825598	gb	EME32594.1		1.512e-12	42.9	KSVTPEVLASY			631. transcription initiation factor TFIID subunit D1 isoform 1 [Galdieria sulphuraria]			597 aa protein
gi	154418556	ref	XP_001582296.1		1.4904e-12	28.6	VTYHPEIGEKY			162. hypothetical protein [Trichomonas vaginalis G3]			BAH34741.1 GI	226186637
gi	488838812	ref	WP_002751218.1		1.4628e-12	35.7	VTSVPEILASF			703. hypothetical protein [Microcystis aeruginosa]
gi	262199843	ref	YP_003271052.1		1.3992e-12	42.9	RACAPELGALF			292. carboxypeptidase Taq [Haliangium ochraceum DSM 14365]		226226985	253. lysyl-tRNA synthetase [Gemmatimonas aurantiaca T-27]
gi	495984156	ref	WP_008708735.1		1.33632e-12	35.7	AALHPELAGLY			892. hypothetical protein [Synergistes sp. 3_1_syn1]			523 aa protein
gi	256377870	ref	YP_003101530.1		1.33056e-12	42.9	EAVTPEVAAAW			281. oxidoreductase FAD/NAD(P)-binding domain-containing protein [Actinosynnema mirum DSM 43827]			YP_002761091.1 GI	226226985
gi	499124655	ref	WP_010853544.1		1.32e-12	28.6	YSSHPELKQGW			957. Glutamate carboxypeptidase II precursor [Cyclobacteriaceae bacterium AK24]
gi	340710138	ref	XP_003393653.1		1.272e-12	50	KACHPEIAHSF			445. PREDICTED		226312781	254. malonyl-CoA transacylase [Brevibacillus brevis NBRC 100599]
gi	482815129	gb	EOA91804.1		1.25928e-12	42.9	EAVHPELLEFF			681. hypothetical protein SETTUDRAFT_178211 [Setosphaeria turcica Et28A]			422 aa protein
gi	495049558	ref	WP_007774394.1		1.22112e-12	50	AASHPEVLGAF			856. ABC transporter substrate-binding protein [Mycobacterium colombiense]			YP_002772675.1 GI	226312781
gi	402466173	gb	EJW01717.1		1.215e-12	28.6	ASSHPEILESY			563. hypothetical protein EDEG_03760 [Edhazardia aedis USNM 41457]
gi	37523837	ref	NP_927214.1		1.2006e-12	28.6	LTLAPELLAGY			37. hypothetical protein glr4268 [Gloeobacter violaceus PCC 7421]		226357232	255. aerobactin siderophore biosynthesis protein [Deinococcus deserti VCD115]
gi	322705317	gb	EFY96904.1		1.188e-12	35.7	RAVAPEIRAGY			404. hypothetical protein MAA_07717 [Metarhizium robertsii ARSEF 23]			584 aa protein
gi	333923883	ref	YP_004497463.1		1.152e-12	42.9	LASSPELKAAY			425. DNA polymerase III subunit alpha [Desulfotomaculum carboxydivorans CO-1-SRB]			YP_002786972.1 GI	226357232
gi	488497784	ref	WP_002541226.1		1.11936e-12	57.1	RAVSPEVGQKF			693. Altronate hydrolase [Grimontia indica]
gi	152965477	ref	YP_001361261.1		1.07712e-12	35.7	SASRPELLDGY			155. hypothetical protein Krad_1509 [Kineococcus radiotolerans SRS30216 = ATCC BAA-149]		226357813	256. N-acetylglucosamine-6-phosphate deacetylase [Deinococcus deserti VCD115]
gi	374313189	ref	YP_005059619.1		1.06848e-12	50	AAVTPEVAAKF			484. integrase family protein [Granulicella mallensis MP5ACTX8]			383 aa protein
gi	493804420	ref	WP_006752261.1		1.0176e-12	50	AASAPELGPLF			811. transporter [Burkholderia ambifaria]			YP_002787553.1 GI	226357813
gi	150864806	ref	XP_001383782.2		1.0143e-12	42.9	VTSTPEVGPRY			154. hypothetical protein PICST_65421 [Scheffersomyces stipitis CBS 6054]
gi	492837823	ref	WP_005991777.1		9.8208e-13	42.9	AAFRPELGAIY			776. histidinol-phosphate aminotransferase [Desulfovibrio fructosivorans]		226365787	257. phosphomannomutase/phosphoglucomutase [Rhodococcus opacus B4]
gi	497853739	ref	WP_010167895.1		9.6768e-13	50	YAVSPEVAGRY			935. ABC transporter substrate-binding protein [Epulopiscium sp. 'N.t. morphotype B']			455 aa protein
gi	198423670	ref	XP_002129832.1		9.54e-13	35.7	YSSYPELLQGF			229. PREDICTED			YP_002783570.1 GI	226365787
gi	500254915	gb	EON98469.1		8.928e-13	50	YAFSPEIAAKY			959. putative -dichlorophenol 6- protein [Togninia minima UCRPA7]
gi	303288854	ref	XP_003063715.1		8.64e-13	35.7	VASVPEIKQAY			364. chloroplast envelope protein translocase family [Micromonas pusilla CCMP1545]		226945307	258. AraC family transcriptional regulator [Azotobacter vinelandii DJ]
gi	390346860	ref	XP_792233.2		8.316e-13	35.7	VASTPEIAQVW			531. PREDICTED			269 aa protein
gi	451849441	gb	EMD62745.1		7.452e-13	35.7	LTSAPEVAQLY			627. glycoside hydrolase family 3 protein [Bipolaris sorokiniana ND90Pr]			YP_002800380.1 GI	226945307
gi	120596912	ref	YP_961486.1		7.392e-13	35.7	AAVTPEIAASW			101. hypothetical protein Sputw3181_0079 [Shewanella sp. W3-18-1]
gi	495985907	ref	WP_008710486.1		7.344e-13	42.9	SASHPEVKMSY					229819836	259. hypothetical protein Bcav_1341 [Beutenbergia cavernae DSM 12333]
gi	46447450	ref	YP_008815.1		7.314e-13	35.7	ETSYPEILAKF			42. hypothetical protein pc1816 [Candidatus Protochlamydia amoebophila UWE25]			385 aa protein
gi	115401644	ref	XP_001216410.1		7.056e-13	35.7	YAYTPEIAARY			78. conserved hypothetical protein [Aspergillus terreus NIH2624]			YP_002881362.1 GI	229819836
gi	490198371	ref	WP_004096891.1		6.336e-13	35.7	LASRPELLDSY
gi	123490404	ref	XP_001325602.1		6.12e-13	28.6	ASSKPELLQKY			106. hypothetical protein [Trichomonas vaginalis G3]		239814001	260. LysR family transcriptional regulator [Variovorax paradoxus S110]
gi	291296586	ref	YP_003507984.1		6.048e-13	35.7	VASTPELRAAY			314. oligopeptidase A [Meiothermus ruber DSM 1279]			327 aa protein
gi	490754317	ref	WP_004616621.1		5.9904e-13	35.7	GAVAPELLDLY			747. putative transcriptional regulator [Caulobacter vibrioides]			YP_002942911.1 GI	239814001
gi	347531446	ref	YP_004838209.1		5.7132e-13	35.7	ETIHPEVPAGY			460. putative esterase [Roseburia hominis A2-183]
gi	312073895	ref	XP_003139725.1		5.4e-13	28.6	LSSHPELAALY			379. hypothetical protein LOAG_04140 [Loa loa]		239818183	261. class III aminotransferase [Variovorax paradoxus S110]
gi	377808658	ref	YP_004979850.1		5.4e-13	42.9	VASAPEIRPSY			493. two component transcriptional regulator [Burkholderia sp. YI23]			427 aa protein
gi	171060055	ref	YP_001792404.1		5.3424e-13	42.9	AASAPELAQRF			200. molybdopterin oxidoreductase [Leptothrix cholodnii SP-6]			YP_002947093.1 GI	239818183
gi	255087360	ref	XP_002505603.1		5.184e-13	42.9	VASVPEVKQAY			271. DnaJ family-like protein [Micromonas sp. RCC299]
gi	497209395	ref	WP_009523657.1		5.0112e-13	42.9	AALVPEVLAGY			920. XRE family transcriptional regulator [Ralstonia sp. PBA]		242020292	262. hypothetical protein Phum_PHUM491190 [Pediculus humanus corporis]
gi	156934923	ref	YP_001438839.1		4.5792e-13	42.9	EAIYPELAQSF			169. multifunctional acyl-CoA thioesterase I and protease I and lysophospholipase L1 [Cronobacter sakazakii ATCC BAA-894]			100 aa protein
gi	495056737	ref	WP_007781571.1		4.5792e-13	42.9	EAIYPELAHSF						XP_002430589.1 GI	242020292
gi	124267208	ref	YP_001021212.1		4.3848e-13	35.7	VALYPELAARY			107. hypothetical protein Mpe_A2019 [Methylibium petroleiphilum PM1]
gi	494482732	ref	WP_007272206.1		4.176e-13	50	WALHPEVLPGY			836. Peptidyl-dipeptidase dcp [Arthrobacter gangotriensis]		242209799	263. predicted protein [Postia placenta Mad-698-R]
gi	501179912	ref	WP_012223042.1		4.158e-13	42.9	LAGAPEVLARY						377 aa protein
gi	496977095	ref	WP_009425571.1		3.8556e-13	42.9	SAVAPEVAARY			917. ResB-like protein [Neisseria sp. oral taxon 020]			XP_002470745.1 GI	242209799
gi	45268962	gb	AAS55894.1		3.564e-13	35.7	VASAPEIAQVW			40. phospholipase C beta [Lytechinus pictus]
gi	220904783	ref	YP_002480095.1		3.2736e-13	42.9	YAFAPELLAGW			242. periplasmic binding protein [Desulfovibrio desulfuricans subsp. desulfuricans str. ATCC 27774]		242209803	264. predicted protein [Postia placenta Mad-698-R]
gi	119357306	ref	YP_911950.1		3.1878e-13	35.7	ETGTPEVLQKY			90. PilT domain-containing protein [Chlorobium phaeobacteroides DSM 266]			352 aa protein
gi	493150677	ref	WP_006162153.1		3.0888e-13	35.7	GASAPELALKY			781. hypothetical protein [Cupriavidus basilensis]			XP_002470747.1 GI	242209803
gi	490029271	ref	WP_003931748.1		3.0528e-13	42.9	VAVAPELAGGF			724. amino acid adenylation protein [Mycobacterium vaccae]
gi	494060096	ref	WP_007002179.1		3.0528e-13	42.9	AAIAPELLAGF					242239270	265. GntR family transcriptional regulator [Dickeya dadantii Ech703]
gi	396475108	ref	XP_003839707.1		2.436e-13	35.7	LALTPELLASY			548. hypothetical protein LEMA_P111470.1 [Leptosphaeria maculans JN3]			467 aa protein
gi	498008456	ref	WP_010322612.1		2.4288e-13	42.9	VTSSPEVLAGW			943. outer membrane adhesin-like protein [Marinobacterium stanieri]			YP_002987451.1 GI	242239270
gi	471562486	gb	EMR63969.1		2.304e-13	42.9	YAYSPEIAAKY			663. putative -dichlorophenol 6- protein [Eutypa lata UCREL1]
gi	375265448	ref	YP_005022891.1		2.244e-13	35.7	LASKPELLQFY			489. lipoprotein NlpC [Vibrio sp. EJY3]		242787360	266. VPS9 domain protein, putative [Talaromyces stipitatus ATCC 10500]
gi	494751958	ref	WP_007487366.1		2.0736e-13	42.9	KAIHPELLAVY			844. hypothetical protein [Bacteroides nordii]			680 aa protein
gi	134058748	emb	CAK38732.1		2.016e-13	35.7	YAYTPEIAAKY			118. unnamed protein product [Aspergillus niger]			XP_002480991.1 GI	242787360
gi	72162606	ref	YP_290263.1		1.9872e-13	35.7	ATVHPEVLAAY			56. amidase [Thermobifida fusca YX]
gi	169237510	ref	YP_001690714.1		1.8876e-13	35.7	GAGHPELLLGY			194. hypothetical protein OE5265F [Halobacterium salinarum R1]		244538939	267. DNA mismatch repair protein [Candidatus Ishikawaella capsulata Mpkobe]
gi	430742700	ref	YP_007201829.1		1.836e-13	50	NAVAPEVLPGY			604. hypothetical protein Sinac_1763 [Singulisphaera acidiphila DSM 18658]			859 aa protein
gi	294011315	ref	YP_003544775.1		1.584e-13	35.7	VAGVPEIGAIY			317. NADH dehydrogenase I chain G [Sphingobium japonicum UT26S]			BAH82982.1 GI	244538939
gi	491802801	ref	WP_005608391.1		1.3524e-13	28.6	YTSTPELLQRY			769. oxidoreductase [Ruminococcus lactaris]
gi	344234520	gb	EGV66388.1		1.3056e-13	42.9	SAVSPELLALY			452. hypothetical protein CANTEDRAFT_100277 [Candida tenuis ATCC 10573]		251773070	268. hypothetical protein UBAL3_74420085 [Leptospirillum ferrodiazotrophum]
gi	260828155	ref	XP_002609029.1		1.2852e-13	42.9	SAVHPEVAARY			287. hypothetical protein BRAFLDRAFT_124020 [Branchiostoma floridae]			341 aa protein
gi	496375173	ref	WP_009084163.1		1.2528e-13	35.7	VALAPELLAAY						EES53626.1 GI	251773070
gi	346321461	gb	EGX91060.1		1.0368e-13	42.9	YASVPEVLAAY			456. initiation-specific alpha-1,6-mannosyltransferase [Cordyceps militaris CM01]
gi	477533982	gb	ENH85547.1		1.0368e-13	42.9	YASVPEVLQAY			671. initiation-specific alpha-mannosyltransferase [Colletotrichum orbiculare MAFF 240422]		251794754	269. LuxR family transcriptional regulator [Paenibacillus sp. JDR-2]
gi	490100743	ref	WP_004002631.1		9.504e-14	35.7	AAVRPELAQGY			733. hypothetical protein [Streptomyces viridochromogenes]			200 aa protein
gi	343083737	ref	YP_004773032.1		7.632e-14	50	EAYAPEVLHSF			449. glycoside hydrolase [Cyclobacterium marinum DSM 745]			YP_003009485.1 GI	251794754
gi	499124962	ref	WP_010853843.1		7.632e-14	50	EAYAPEVLASF			958. Alpha-amylase [Cyclobacteriaceae bacterium AK24]
gi	470429152	ref	XP_004338167.1		7.392e-14	35.7	RAVTPELLQLY			655. protein phosphatase 4 regulatory subunit 1, putative [Acanthamoeba castellanii str. Neff]		255084653	270. predicted protein [Micromonas sp. RCC299]
gi	494599671	ref	WP_007357924.1		6.12e-14	42.9	LAVKPEVLAGY			840. MULTISPECIES			429 aa protein
gi	489261360	ref	WP_003169236.1		5.28e-14	50	EAVHPEVLPGW			710. hypothetical protein [Brevundimonas diminuta]			XP_002508901.1 GI	255084653
gi	494199466	ref	WP_007124574.1		4.876e-14	35.7	ETSHPELGQKF
gi	207744480	ref	YP_002260872.1		4.752e-14	35.7	VAGAPELAALY			233. gamma-glutamyltranspeptidase precursor protein [Ralstonia solanacearum IPO1609]		255087360	271. DnaJ family-like protein [Micromonas sp. RCC299]
gi	496879453	ref	WP_009395574.1		4.176e-14	42.9	WALHPEVLAGY			916. peptidyl-dipeptidase [Actinomyces sp. oral taxon 171]			613 aa protein
gi	448241840	ref	YP_007405893.1		1.44e-14	35.7	LASHPELAALY			617. LacI family transcriptional regulator [Serratia marcescens WW4]			XP_002505603.1 GI	255087360
gi	297571656	ref	YP_003697430.1		1.152e-14	42.9	WAYHPEVLASY			334. peptidyl-dipeptidase Dcp [Arcanobacterium haemolyticum DSM 20595]
gi	145349544	ref	XP_001419191.1		2.16e-15	50	VASAPEVGALY			125. predicted protein [Ostreococcus lucimarinus CCE9901]		255530250	272. hypothetical protein Phep_0336 [Pedobacter heparinus DSM 2366]
												502 aa protein
												YP_003090622.1 GI	255530250
											255530469	273. Lantibiotic dehydratase domain-containing protein [Pedobacter heparinus DSM 2366]
												757 aa protein
												YP_003090841.1 GI	255530469
											255533257	274. sulfatase [Pedobacter heparinus DSM 2366]
												481 aa protein
												YP_003093629.1 GI	255533257
											255548117	275. hypothetical protein RCOM_1341370 [Ricinus communis]
												233 aa protein
												XP_002515115.1 GI	255548117
											255705110	276. polyprotein [Cassava brown streak virus]
												2912 aa protein
												CBA13345.1 GI	255705110
											255939057	277. Pc15g00720 [Penicillium rubens Wisconsin 54-1255]
												399 aa protein
												XP_002560298.1 GI	255939057
											255986448	278. gag protein [Human immunodeficiency virus 1]
												501 aa protein
												ACU50607.1 GI	255986448
											256371125	279. metal ion transporter, nramp family protein [Acidimicrobium ferrooxidans DSM 10331]
												448 aa protein
												YP_003108949.1 GI	256371125
											256374362	280. SARP family transcriptional regulator [Actinosynnema mirum DSM 43827]
												1088 aa protein
												YP_003098022.1 GI	256374362
											256377870	281. oxidoreductase FAD/NAD(P)-binding domain-containing protein [Actinosynnema mirum DSM 43827]
												407 aa protein
												YP_003101530.1 GI	256377870
											256389342	282. 5-formyltetrahydrofolate cyclo-ligase [Catenulispora acidiphila DSM 44928]
												215 aa protein
												YP_003110906.1 GI	256389342
											256389974	283. histidine kinase [Catenulispora acidiphila DSM 44928]
												437 aa protein
												YP_003111538.1 GI	256389974
											256825947	284. endothelin-converting enzyme [Kytococcus sedentarius DSM 20547]
												662 aa protein
												YP_003149907.1 GI	256825947
											257373009	285. IucA/IucC family protein [Halomicrobium mukohataei DSM 12286]
												591 aa protein
												YP_003175783.1 GI	257373009
											258650383	286. neprilysin [Nakamurella multipartita DSM 44233]
												651 aa protein
												YP_003199539.1 GI	258650383
											260828155	287. hypothetical protein BRAFLDRAFT_124020 [Branchiostoma floridae]
												378 aa protein
												XP_002609029.1 GI	260828155
											260841216	288. hypothetical protein BRAFLDRAFT_168499, partial [Branchiostoma floridae]
												262 aa protein
												XP_002613824.1 GI	260841216
											261327425	289. leucine-rich repeat protein (LRRP), putative [Trypanosoma brucei gambiense DAL972]
												260 aa protein
												CBH10400.1 GI	261327425
											261416377	290. hypothetical protein Fisuc_1990 [Fibrobacter succinogenes subsp. succinogenes S85]
												545 aa protein
												YP_003250060.1 GI	261416377
											262197731	291. aldehyde dehydrogenase [Haliangium ochraceum DSM 14365]
												1577 aa protein
												YP_003268940.1 GI	262197731
											262199843	292. carboxypeptidase Taq [Haliangium ochraceum DSM 14365]
												501 aa protein
												YP_003271052.1 GI	262199843
											262202354	293. non-ribosomal peptide synthase [Gordonia bronchialis DSM 43247]
												289 aa protein
												YP_003273562.1 GI	262202354
											269122956	294. hypothetical protein Smon_0167 [Streptobacillus moniliformis DSM 12112]
												1336 aa protein
												YP_003305533.1 GI	269122956
											269123994	295. hypothetical protein Smon_1240 [Streptobacillus moniliformis DSM 12112]
												1348 aa protein
												YP_003306571.1 GI	269123994
											269308083	296. gag protein, partial [Human immunodeficiency virus 1]
												463 aa protein
												ACZ34129.1 GI	269308083
											269795107	297. orotidine 5'-phosphate decarboxylase, subfamily 2 [Sanguibacter keddieii DSM 10542]
												308 aa protein
												YP_003314562.1 GI	269795107
											269796764	298. acyl dehydratase [Sanguibacter keddieii DSM 10542]
												339 aa protein
												YP_003316219.1 GI	269796764
											269837971	299. NAD(P)(+) transhydrogenase [Sphaerobacter thermophilus DSM 20745]
												388 aa protein
												YP_003320199.1 GI	269837971
											270001289	300. protocadherin 15 [Tribolium castaneum]
												1539 aa protein
												EEZ97736.1 GI	270001289
											270007408	301. hypothetical protein TcasGA2_TC013972 [Tribolium castaneum]
												241 aa protein
												EFA03856.1 GI	270007408
											281206247	302. hypothetical protein PPL_07271 [Polysphondylium pallidum PN500]
												1344 aa protein
												EFA80436.1 GI	281206247
											282164556	303. hypothetical protein MCP_1886 [Methanocella paludicola SANAE]
												580 aa protein
												YP_003356941.1 GI	282164556
											283778843	304. acriflavin resistance protein [Pirellula staleyi DSM 6068]
												1129 aa protein
												YP_003369598.1 GI	283778843
											283784612	305. hypothetical protein ROD_08551 [Citrobacter rodentium ICC168]
												125 aa protein
												YP_003364477.1 GI	283784612
											284029182	306. Neprilysin [Kribbella flavida DSM 17836]
												651 aa protein
												YP_003379113.1 GI	284029182
											284030770	307. glycosyl hydrolase family 98 putative carbohydrate binding module [Kribbella flavida DSM 17836]
												877 aa protein
												YP_003380701.1 GI	284030770
											284031113	308. IucA/IucC family protein [Kribbella flavida DSM 17836]
												560 aa protein
												YP_003381044.1 GI	284031113
											284048977	309. 7-cyano-7-deazaguanine reductase [Acidaminococcus fermentans DSM 20731]
												154 aa protein
												YP_003399316.1 GI	284048977
											288940775	310. PAS/PAC sensor-containing diguanylate cyclase/phosphodiesterase [Allochromatium vinosum DSM 180]
												1124 aa protein
												YP_003443015.1 GI	288940775
											288962814	311. TRAP dicarboxylate transporter [Azospirillum sp. B510]
												341 aa protein
												YP_003453108.1 GI	288962814
											289551722	312. von Willebrand factor A [Staphylococcus lugdunensis HKU09-01]
												2194 aa protein
												YP_003472626.1 GI	289551722
											290473243	313. LysR family transcriptional regulator [Xenorhabdus bovienii SS-2004]
												299 aa protein
												YP_003466108.1 GI	290473243
											291296586	314. oligopeptidase A [Meiothermus ruber DSM 1279]
												675 aa protein
												YP_003507984.1 GI	291296586
											291299321	315. type 11 methyltransferase [Stackebrandtia nassauensis DSM 44728]
												275 aa protein
												YP_003510599.1 GI	291299321
											292493983	316. iron transport protein A [Haloferax volcanii DS2]
												593 aa protein
												YP_003533125.1 GI	292493983
											294011315	317. NADH dehydrogenase I chain G [Sphingobium japonicum UT26S]
												676 aa protein
												YP_003544775.1 GI	294011315
											294661848	318. motile sperm domain containing 2 [Gallus gallus]
												517 aa protein
												NP_001170988.1 GI	294661848
											294678175	319. glycerol kinase [Rhodobacter capsulatus SB 1003]
												487 aa protein
												YP_003578790.1 GI	294678175
											295132633	320. alpha-glucosidase [Zunongwangia profunda SM-A87]
												800 aa protein
												YP_003583309.1 GI	295132633
											295696773	321. urease accessory protein UreG [Kyrpidia tusciae DSM 2912]
												223 aa protein
												YP_003590011.1 GI	295696773
											295844302	322. auxin response factor 14 [Zea mays]
												672 aa protein
												ADG43148.1 GI	295844302
											296005005	323. conserved Plasmodium protein, unknown function [Plasmodium falciparum 3D7]
												315 aa protein
												XP_002808843.1 GI	296005005
											296101978	324. nitrate reductase catalytic subunit [Enterobacter cloacae subsp. cloacae ATCC 13047]
												825 aa protein
												YP_003612124.1 GI	296101978
											296103168	325. putative inner membrane protein [Enterobacter cloacae subsp. cloacae ATCC 13047]
												127 aa protein
												YP_003613314.1 GI	296103168
											296127320	326. ABC transporter substrate-binding protein [Brachyspira murdochii DSM 12563]
												400 aa protein
												YP_003634572.1 GI	296127320
											296129221	327. neprilysin [Cellulomonas flavigena DSM 20109]
												662 aa protein
												YP_003636471.1 GI	296129221
											296129575	328. 6-phosphogluconate dehydrogenase [Cellulomonas flavigena DSM 20109]
												484 aa protein
												YP_003636825.1 GI	296129575
											296269926	329. AMP-dependent synthetase and ligase [Thermobispora bispora DSM 43833]
												613 aa protein
												YP_003652558.1 GI	296269926
											296394822	330. amino acid adenylation domain-containing protein [Segniliparus rotundus DSM 44985]
												1079 aa protein
												YP_003659706.1 GI	296394822
											296415598	331. hypothetical protein [Tuber melanosporum Mel28]
												550 aa protein
												XP_002837473.1 GI	296415598
											297172686	332. lysyl-tRNA synthetase (class II) [uncultured Gemmatimonadales bacterium HF4000_15H13]
												508 aa protein
												ADI23653.1 GI	297172686
											297568629	333. PAS/PAC sensor hybrid histidine kinase [Desulfurivibrio alkaliphilus AHT2]
												817 aa protein
												YP_003689973.1 GI	297568629
											297571656	334. peptidyl-dipeptidase Dcp [Arcanobacterium haemolyticum DSM 20595]
												669 aa protein
												YP_003697430.1 GI	297571656
											297572203	335. xanthine permease [Arcanobacterium haemolyticum DSM 20595]
												619 aa protein
												YP_003697977.1 GI	297572203
											297624429	336. alpha/beta hydrolase fold protein [Truepera radiovictrix DSM 17093]
												311 aa protein
												YP_003705863.1 GI	297624429
											297625201	337. transcriptional regulator [Propionibacterium freudenreichii subsp. shermanii CIRM-BIA1]
												205 aa protein
												YP_003686964.1 GI	297625201
											297829822	338. hypothetical protein ARALYDRAFT_478650 [Arabidopsis lyrata subsp. lyrata]
												251 aa protein
												XP_002882793.1 GI	297829822
											298291971	339. multi-sensor hybrid histidine kinase [Starkeya novella DSM 506]
												853 aa protein
												YP_003693910.1 GI	298291971
											298711459	340. Glutamate synthase, N-terminal fragment [Ectocarpus siliculosus]
												337 aa protein
												CBJ32598.1 GI	298711459
											298713164	341. DEAD box helicase [Ectocarpus siliculosus]
												1408 aa protein
												CBJ26920.1 GI	298713164
											299742020	342. hypothetical protein CC1G_15153 [Coprinopsis cinerea okayama7#130]
												399 aa protein
												XP_002910514.1 GI	299742020
											299746676	343. hypothetical protein CC1G_12821 [Coprinopsis cinerea okayama7#130]
												435 aa protein
												XP_001840548.2 GI	299746676
											299751655	344. hypothetical protein CC1G_14200 [Coprinopsis cinerea okayama7#130]
												336 aa protein
												XP_002911667.1 GI	299751655
											300121547	345. unnamed protein product [Blastocystis hominis]
												787 aa protein
												CBK22066.2 GI	300121547
											300312905	346. glutamate synthase [Herbaspirillum seropedicae SmR1]
												531 aa protein
												YP_003776997.1 GI	300312905
											300694019	347. putative dipeptide transport ATP-binding protein dppD [Ralstonia solanacearum PSI07]
												541 aa protein
												YP_003749992.1 GI	300694019
											300716726	348. AraC family transcriptional regulator [Erwinia billingiae Eb661]
												328 aa protein
												YP_003741529.1 GI	300716726
											300786646	349. non-ribosomal peptide synthetase [Amycolatopsis mediterranei U32]
												1608 aa protein
												YP_003766937.1 GI	300786646
											300788881	350. hydrogenobyrinic acid a,c-diamide synthase [Amycolatopsis mediterranei U32]
												445 aa protein
												YP_003769172.1 GI	300788881
											300855499	351. sigma-54-interacting transcriptional regulator [Clostridium ljungdahlii DSM 13528]
												646 aa protein
												YP_003780483.1 GI	300855499
											300858141	352. mycothiol conjugate amidase [Corynebacterium pseudotuberculosis FRC41]
												296 aa protein
												YP_003783124.1 GI	300858141
											301092772	353. conserved hypothetical protein [Phytophthora infestans T30-4]
												365 aa protein
												XP_002997238.1 GI	301092772
											301097535	354. conserved hypothetical protein [Phytophthora infestans T30-4]
												2189 aa protein
												XP_002897862.1 GI	301097535
											301766892	355. PREDICTED	LOW QUALITY PROTEIN	titin-like [Ailuropoda melanoleuca]
												33410 aa protein
												XP_002918867.1 GI	301766892
											302035575	356. cytochrome P450 [Candidatus Nitrospira defluvii]
												460 aa protein
												YP_003795897.1 GI	302035575
											302335486	357. ATP-dependent nuclease subunit B [Olsenella uli DSM 7084]
												1125 aa protein
												YP_003800693.1 GI	302335486
											302342565	358. DNA topoisomerase I [Desulfarculus baarsii DSM 2075]
												806 aa protein
												YP_003807094.1 GI	302342565
											302414820	359. conserved hypothetical protein [Verticillium alfalfae VaMs.102]
												395 aa protein
												XP_003005242.1 GI	302414820
											302864567	360. RNA polymerase sigma-70 factor [Micromonospora aurantiaca ATCC 27029]
												176 aa protein
												YP_003833204.1 GI	302864567
											302866931	361. amino acid adenylation domain-containing protein [Micromonospora aurantiaca ATCC 27029]
												1229 aa protein
												YP_003835568.1 GI	302866931
											302925181	362. hypothetical protein NECHADRAFT_75799 [Nectria haematococca mpVI 77-13-4]
												583 aa protein
												XP_003054047.1 GI	302925181
											303272803	363. nucleobase	Cation symporter-1 family [Micromonas pusilla CCMP1545]
												2560 aa protein
												XP_003055763.1 GI	303272803
											303288854	364. chloroplast envelope protein translocase family [Micromonas pusilla CCMP1545]
												611 aa protein
												XP_003063715.1 GI	303288854
											304314165	365. hypothetical protein MTBMA_c03980 [Methanothermobacter marburgensis str. Marburg]
												353 aa protein
												YP_003849312.1 GI	304314165
											305667631	366. alpha-glucosidase [Maribacter sp. HTCC2170]
												799 aa protein
												YP_003863918.1 GI	305667631
											307102957	367. hypothetical protein CHLNCDRAFT_55239 [Chlorella variabilis]
												994 aa protein
												EFN51222.1 GI	307102957
											307154004	368. Carbohydrate kinase, FGGY-like protein [Cyanothece sp. PCC 7822]
												430 aa protein
												YP_003889388.1 GI	307154004
											307353027	369. phosphoadenosine phosphosulfate reductase [Methanoplanus petrolearius DSM 11571]
												517 aa protein
												YP_003894078.1 GI	307353027
											307354456	370. hypothetical protein Mpet_2322 [Methanoplanus petrolearius DSM 11571]
												193 aa protein
												YP_003895507.1 GI	307354456
											308182045	371. acetylesterase [Lactobacillus plantarum subsp. plantarum ST-III]
												263 aa protein
												YP_003926173.1 GI	308182045
											308456918	372. hypothetical protein CRE_12380 [Caenorhabditis remanei]
												848 aa protein
												XP_003090868.1 GI	308456918
											308801525	373. DNA helicase isolog (ISS) [Ostreococcus tauri]
												1174 aa protein
												XP_003078076.1 GI	308801525
											308809790	374. putative serine/threonine kinase (ISS) [Ostreococcus tauri]
												403 aa protein
												XP_003082204.1 GI	308809790
											310780112	375. methyltransferase small [Ilyobacter polytropus DSM 2926]
												245 aa protein
												YP_003968444.1 GI	310780112
											310819759	376. hypothetical protein STAUR_2486 [Stigmatella aurantiaca DW4/3-1]
												264 aa protein
												YP_003952117.1 GI	310819759
											310823270	377. oxidoreductase nad-binding domain-containing protein [Stigmatella aurantiaca DW4/3-1]
												1252 aa protein
												YP_003955628.1 GI	310823270
											310825319	378. sigma54 specific transcriptional regulator [Stigmatella aurantiaca DW4/3-1]
												453 aa protein
												YP_003957677.1 GI	310825319
											312073895	379. hypothetical protein LOAG_04140 [Loa loa]
												996 aa protein
												XP_003139725.1 GI	312073895
											312109711	380. hypothetical protein GY4MC1_0587 [Geobacillus sp. Y4.1MC1]
												530 aa protein
												YP_003988027.1 GI	312109711
											312115166	381. hypothetical protein Rvan_2443 [Rhodomicrobium vannielii ATCC 17100]
												145 aa protein
												YP_004012762.1 GI	312115166
											312135707	382. glycoside hydrolase family 4 [Caldicellulosiruptor owensensis OL]
												464 aa protein
												YP_004003045.1 GI	312135707
											313122584	383. siderophore synthetase component [Halogeometricum borinquense DSM 11551]
												601 aa protein
												YP_004044511.1 GI	313122584
											313676769	384. group 1 glycosyl transferase [Marivirga tractuosa DSM 4126]
												384 aa protein
												YP_004054765.1 GI	313676769
											313677447	385. family 2 glycosyl transferase [Marivirga tractuosa DSM 4126]
												491 aa protein
												YP_004055443.1 GI	313677447
											313682157	386. rieske (2fe-2S) iron-sulfur domain [Sulfuricurvum kujiense DSM 16994]
												241 aa protein
												YP_004059895.1 GI	313682157
											315497736	387. transcription factor jumonji jmjc domain-containing protein [Asticcacaulis excentricus CB 48]
												344 aa protein
												YP_004086540.1 GI	315497736
											319786818	388. outer membrane autotransporter barrel domain-containing protein [Pseudoxanthomonas suwonensis 11-1]
												1117 aa protein
												YP_004146293.1 GI	319786818
											319789937	389. peptidase M16 domain protein [Thermovibrio ammonificans HB-1]
												403 aa protein
												YP_004151570.1 GI	319789937
											319791604	390. RNA-binding s4 domain-containing protein [Variovorax paradoxus EPS]
												241 aa protein
												YP_004153244.1 GI	319791604
											319795305	391. hypothetical protein Varpa_4671 [Variovorax paradoxus EPS]
												1014 aa protein
												YP_004156945.1 GI	319795305
											320104128	392. methyltransferase GidB [Isosphaera pallida ATCC 43644]
												505 aa protein
												YP_004179719.1 GI	320104128
											320335872	393. phenylalanyl-tRNA synthetase subunit beta [Deinococcus maricopensis DSM 21211]
												818 aa protein
												YP_004172583.1 GI	320335872
											320354216	394. CoA-binding domain-containing protein [Desulfobulbus propionicus DSM 2032]
												889 aa protein
												YP_004195555.1 GI	320354216
											320449758	395. polyphosphate kinase [Thermus scotoductus SA-01]
												633 aa protein
												YP_004201854.1 GI	320449758
											321452148	396. hypothetical protein DAPPUDRAFT_119070 [Daphnia pulex]
												1879 aa protein
												EFX63608.1 GI	321452148
											321456030	397. hypothetical protein DAPPUDRAFT_189551 [Daphnia pulex]
												886 aa protein
												EFX67148.1 GI	321456030
											321473744	398. hypothetical protein DAPPUDRAFT_47063, partial [Daphnia pulex]
												359 aa protein
												EFX84711.1 GI	321473744
											321479468	399. mitochondrial inner membrane protein-like protein [Daphnia pulex]
												1275 aa protein
												EFX90424.1 GI	321479468
											322417546	400. chromosomal replication initiator protein DnaA [Geobacter sp. M18]
												465 aa protein
												YP_004196769.1 GI	322417546
											322419193	401. rubrerythrin [Geobacter sp. M18]
												161 aa protein
												YP_004198416.1 GI	322419193
											322695253	402. flavohemoglobin [Metarhizium acridum CQMa 102]
												419 aa protein
												EFY87064.1 GI	322695253
											322696020	403. putative steroid monooxygenase [Metarhizium acridum CQMa 102]
												555 aa protein
												EFY87819.1 GI	322696020
											322705317	404. hypothetical protein MAA_07717 [Metarhizium robertsii ARSEF 23]
												820 aa protein
												EFY96904.1 GI	322705317
											322712373	405. Globin, subset [Metarhizium robertsii ARSEF 23]
												419 aa protein
												EFZ03946.1 GI	322712373
											325107207	406. galactarate dehydratase [Planctomyces brasiliensis DSM 5305]
												515 aa protein
												YP_004268275.1 GI	325107207
											325298906	407. hypothetical protein [Bacteroides salanitronis DSM 18170]
												218 aa protein
												YP_004258823.1 GI	325298906
											325963536	408. hypothetical protein Asphe3_21550 [Arthrobacter phenanthrenivorans Sphe3]
												299 aa protein
												YP_004241442.1 GI	325963536
											326499940	409. predicted protein [Hordeum vulgare subsp. vulgare]
												360 aa protein
												BAJ90805.1 GI	326499940
											328720018	410. PREDICTED	GRB2-related adapter protein [Acyrthosiphon pisum]
												378 aa protein
												XP_001950019.2 GI	328720018
											328789915	411. PREDICTED	G-protein coupled receptor Mth2-like [Apis mellifera]
												503 aa protein
												XP_001120679.2 GI	328789915
											328861231	412. hypothetical protein MELLADRAFT_94458 [Melampsora larici-populina 98AG31]
												807 aa protein
												EGG10335.1 GI	328861231
											330467028	413. P-type (transporting) HAD superfamily ATPase [Verrucosispora maris AB-18-032]
												863 aa protein
												YP_004404771.1 GI	330467028
											330507404	414. CO dehydrogenase/acetyl-CoA synthase complex subunit gamma [Methanosaeta concilii GP6]
												471 aa protein
												YP_004383832.1 GI	330507404
											330816192	415. aldehyde oxidase and xanthine dehydrogenase [Burkholderia gladioli BSR3]
												780 aa protein
												YP_004359897.1 GI	330816192
											331695294	416. ferredoxin--NAD(+) reductase [Pseudonocardia dioxanivorans CB1190]
												410 aa protein
												YP_004331533.1 GI	331695294
											331696073	417. Fis family sigma-54 specific transcriptional regulator [Pseudonocardia dioxanivorans CB1190]
												585 aa protein
												YP_004332312.1 GI	331696073
											332031165	418. hypothetical protein G5I_00537 [Acromyrmex echinatior]
												306 aa protein
												EGI70742.1 GI	332031165
											332290925	419. Alpha-glucosidase [Dokdonia sp. 4H-3-7-5]
												800 aa protein
												YP_004429534.1 GI	332290925
											332306726	420. multi-sensor hybrid histidine kinase [Glaciecola sp. 4H-3-7+YE-5]
												1115 aa protein
												YP_004434577.1 GI	332306726
											332661787	421. hypothetical protein Halhy_6568 [Haliscomenobacter hydrossis DSM 1100]
												548 aa protein
												YP_004451257.1 GI	332661787
											332661819	422. hypothetical protein Halhy_6600 [Haliscomenobacter hydrossis DSM 1100]
												833 aa protein
												YP_004451289.1 GI	332661819
											332797089	423. nucleotide excision repair helicase, Xpb1 [Acidianus hospitalis W1]
												544 aa protein
												YP_004458589.1 GI	332797089
											333895331	424. hypothetical protein ambt_19565 [Alteromonas sp. SN2]
												406 aa protein
												YP_004469206.1 GI	333895331
											333923883	425. DNA polymerase III subunit alpha [Desulfotomaculum carboxydivorans CO-1-SRB]
												1204 aa protein
												YP_004497463.1 GI	333923883
											333978194	426. hypothetical protein Desku_0731 [Desulfotomaculum kuznetsovii DSM 6115]
												328 aa protein
												YP_004516139.1 GI	333978194
											334133392	427. AAA ATPase [Novosphingobium sp. PP1Y]
												547 aa protein
												YP_004532771.1 GI	334133392
											334144197	428. glutathione S-transferase domain-containing protein [Thioalkalimicrobium cyclicum ALM1]
												231 aa protein
												YP_004537353.1 GI	334144197
											334318494	429. adenylate/guanylate cyclase [Sinorhizobium meliloti AK83]
												743 aa protein
												YP_004551053.1 GI	334318494
											334335564	430. DNA replication and repair protein RecF [Isoptericola variabilis 225]
												410 aa protein
												YP_004540716.1 GI	334335564
											334345741	431. TonB-dependent receptor [Sphingobium chlorophenolicum L-1]
												738 aa protein
												YP_004554293.1 GI	334345741
											336273168	432. hypothetical protein SMAC_03644 [Sordaria macrospora k-hell]
												1181 aa protein
												XP_003351339.1 GI	336273168
											336275413	433. hypothetical protein SMAC_01293 [Sordaria macrospora k-hell]
												531 aa protein
												XP_003352459.1 GI	336275413
											338174362	434. hypothetical protein PUV_03680 [Parachlamydia acanthamoebae UV-7]
												587 aa protein
												YP_004651172.1 GI	338174362
											338211820	435. aspartyl/glutamyl-tRNA amidotransferase subunit B [Runella slithyformis DSM 19594]
												495 aa protein
												YP_004655873.1 GI	338211820
											338534791	436. hypothetical protein LILAB_25770 [Myxococcus fulvus HW-1]
												158 aa protein
												YP_004668125.1 GI	338534791
											339323658	437. phenol metabolism protein [Cupriavidus necator N-1]
												277 aa protein
												YP_004682552.1 GI	339323658
											339500133	438. hypothetical protein Spica_1516 [Treponema caldaria DSM 7334]
												338 aa protein
												YP_004698168.1 GI	339500133
											339500257	439. hypothetical protein Spica_1641 [Treponema caldaria DSM 7334]
												324 aa protein
												YP_004698292.1 GI	339500257
											339998769	440. hypothetical protein SBG_0767 [Salmonella bongori NCTC 12419]
												125 aa protein
												YP_004729652.1 GI	339998769
											340377297	441. PREDICTED	hypothetical protein LOC100634483 [Amphimedon queenslandica]
												1302 aa protein
												XP_003387166.1 GI	340377297
											340513883	442. predicted protein [Trichoderma reesei QM6a]
												257 aa protein
												EGR44159.1 GI	340513883
											340515793	443. predicted protein [Trichoderma reesei QM6a]
												1650 aa protein
												EGR46045.1 GI	340515793
											340616526	444. alpha-glucosidase [Zobellia galactanivorans]
												799 aa protein
												YP_004734979.1 GI	340616526
											340710138	445. PREDICTED	LOW QUALITY PROTEIN	RNA polymerase I-specific transcription initiation factor RRN3-like [Bombus terrestris]
												566 aa protein
												XP_003393653.1 GI	340710138
											342321467	446. hypothetical protein RTG_00110 [Rhodotorula glutinis ATCC 204091]
												386 aa protein
												EGU13400.1 GI	342321467
											342879510	447. hypothetical protein FOXB_08726 [Fusarium oxysporum Fo5176]
												478 aa protein
												EGU80756.1 GI	342879510
											342880456	448. hypothetical protein FOXB_07916 [Fusarium oxysporum Fo5176]
												590 aa protein
												EGU81571.1 GI	342880456
											343083737	449. glycoside hydrolase [Cyclobacterium marinum DSM 745]
												400 aa protein
												YP_004773032.1 GI	343083737
											343084234	450. hypothetical protein [Cyclobacterium marinum DSM 745]
												188 aa protein
												YP_004773529.1 GI	343084234
											344200901	451. leucine-rich repeat-containing protein [Acidithiobacillus ferrivorans SS3]
												141 aa protein
												YP_004785227.1 GI	344200901
											344234520	452. hypothetical protein CANTEDRAFT_100277 [Candida tenuis ATCC 10573]
												703 aa protein
												EGV66388.1 GI	344234520
											344235591	453. Condensin complex subunit 3 [Cricetulus griseus]
												681 aa protein
												EGV91694.1 GI	344235591
											344256373	454. Poly(rC)-binding protein 2 [Cricetulus griseus]
												176 aa protein
												EGW12477.1 GI	344256373
											345006969	455. NurA domain-containing protein [halophilic archaeon DL31]
												409 aa protein
												YP_004809821.1 GI	345006969
											346321461	456. initiation-specific alpha-1,6-mannosyltransferase [Cordyceps militaris CM01]
												420 aa protein
												EGX91060.1 GI	346321461
											346971477	457. leucine Rich Repeat domain-containing protein [Verticillium dahliae VdLs.17]
												863 aa protein
												EGY14929.1 GI	346971477
											347359751	458. ABC transporter periplasmic protein [Desulfovibrio alaskensis G20]
												538 aa protein
												YP_386771.2 GI	347359751
											347359806	459. hypothetical protein [Desulfovibrio alaskensis G20]
												838 aa protein
												YP_387284.2 GI	347359806
											347531446	460. putative esterase [Roseburia hominis A2-183]
												657 aa protein
												YP_004838209.1 GI	347531446
											347757116	461. hypothetical protein MICA_331 [Micavibrio aeruginosavorus ARL-13]
												188 aa protein
												YP_004864678.1 GI	347757116
											348664816	462. hypothetical protein PHYSODRAFT_343042 [Phytophthora sojae]
												165 aa protein
												EGZ04655.1 GI	348664816
											350525752	463. hypothetical protein [Thermococcus sp. AM4]
												126 aa protein
												YP_004885390.1 GI	350525752
											351711085	464. Myelin-associated glycoprotein [Heterocephalus glaber]
												626 aa protein
												EHB14004.1 GI	351711085
											353238142	465. hypothetical protein PIIN_04037 [Piriformospora indica DSM 11827]
												461 aa protein
												CCA70097.1 GI	353238142
											357136947	466. PREDICTED	protein RMD5 homolog A-like [Brachypodium distachyon]
												386 aa protein
												XP_003570064.1 GI	357136947
											357167412	467. PREDICTED	11-beta-hydroxysteroid dehydrogenase 1B-like [Brachypodium distachyon]
												368 aa protein
												XP_003581150.1 GI	357167412
											357388203	468. hypothetical protein KSE_12530 [Kitasatospora setae KM-6054]
												1395 aa protein
												YP_004903042.1 GI	357388203
											357620597	469. hypothetical protein KGM_13668 [Danaus plexippus]
												312 aa protein
												EHJ72744.1 GI	357620597
											358058844	470. hypothetical protein E5Q_01898 [Mixia osmundae IAM 14324]
												465 aa protein
												GAA95242.1 GI	358058844
											358253471	471. La-related protein 7 [Clonorchis sinensis]
												641 aa protein
												GAA53141.1 GI	358253471
											358331706	472. intraflagellar transport protein 46 homolog [Clonorchis sinensis]
												722 aa protein
												GAA50483.1 GI	358331706
											358339479	473. partitioning defective protein 3 [Clonorchis sinensis]
												1220 aa protein
												GAA47537.1 GI	358339479
											358340371	474. TBC1 domain family member 23 [Clonorchis sinensis]
												980 aa protein
												GAA48278.1 GI	358340371
											358385627	475. hypothetical protein TRIVIDRAFT_56176 [Trichoderma virens Gv29-8]
												745 aa protein
												EHK23223.1 GI	358385627
											361130174	476. putative Methyl-CpG-binding domain protein 4 [Glarea lozoyensis 74030]
												1776 aa protein
												EHL02028.1 GI	361130174
											361130378	477. putative Zinc-type alcohol dehydrogenase-like protein [Glarea lozoyensis 74030]
												351 aa protein
												EHL02191.1 GI	361130378
											365960991	478. hypothetical protein FCOL_09780 [Flavobacterium columnare ATCC 49512]
												780 aa protein
												YP_004942558.1 GI	365960991
											367034399	479. non-ribosomal peptide synthetase [Myceliophthora thermophila ATCC 42464]
												7791 aa protein
												XP_003666482.1 GI	367034399
											367046472	480. hypothetical protein THITE_2116178 [Thielavia terrestris NRRL 8126]
												298 aa protein
												XP_003653616.1 GI	367046472
											373809288	481. O-methyltransferase [Streptomyces sp. CS40]
												342 aa protein
												CCC55909.1 GI	373809288
											374295956	482. fibronectin type III domain-containing protein,CARDB domain-containing protein [ [[Clostridium] clariflavum DSM 19732]
												3729 aa protein
												YP_005046147.1 GI	374295956
											374312780	483. fructose-bisphosphatase [Granulicella mallensis MP5ACTX8]
												319 aa protein
												YP_005059210.1 GI	374312780
											374313189	484. integrase family protein [Granulicella mallensis MP5ACTX8]
												366 aa protein
												YP_005059619.1 GI	374313189
											374996051	485. molybdate ABC transporter periplasmic protein [Desulfosporosinus orientis DSM 765]
												279 aa protein
												YP_004971550.1 GI	374996051
											375140140	486. hypothetical protein [Mycobacterium rhodesiae NBB3]
												415 aa protein
												YP_005000789.1 GI	375140140
											375256140	487. glutaredoxin [Tannerella forsythia ATCC 43037]
												86 aa protein
												YP_005015307.1 GI	375256140
											375259923	488. hypothetical protein KOX_15650 [Klebsiella oxytoca KCTC 1686]
												127 aa protein
												YP_005019093.1 GI	375259923
											375265448	489. lipoprotein NlpC [Vibrio sp. EJY3]
												163 aa protein
												YP_005022891.1 GI	375265448
											375361511	490. NAD(P)H dehydrogenase, quinone family [Bacillus amyloliquefaciens subsp. plantarum CAU B946]
												200 aa protein
												YP_005129550.1 GI	375361511
											376403628	491. rpoC1 gene product (chloroplast) [Pedinomonas minor]
												712 aa protein
												YP_005089855.1 GI	376403628
											377806201	492. hypothetical protein 2203_scaffold802_00041 [unidentified phage]
												389 aa protein
												AFB75907.1 GI	377806201
											377808658	493. two component transcriptional regulator [Burkholderia sp. YI23]
												249 aa protein
												YP_004979850.1 GI	377808658
											377811870	494. hypothetical protein BYI23_D012770 [Burkholderia sp. YI23]
												216 aa protein
												YP_005044310.1 GI	377811870
											378718998	495. hypothetical protein GPOL_c35090 [Gordonia polyisoprenivorans VH2]
												102 aa protein
												YP_005283887.1 GI	378718998
											378727370	496. cyclohexanone monooxygenase [Exophiala dermatitidis NIH/UT8656]
												572 aa protein
												EHY53829.1 GI	378727370
											378733172	497. hypothetical protein HMPREF1120_07616 [Exophiala dermatitidis NIH/UT8656]
												598 aa protein
												EHY59631.1 GI	378733172
											379710469	498. putative gamma-polyglutamic acid synthase [Nocardia cyriacigeorgica GUH-2]
												360 aa protein
												YP_005265674.1 GI	379710469
											379711688	499. putative transcriptional regulator [Nocardia cyriacigeorgica GUH-2]
												219 aa protein
												YP_005266893.1 GI	379711688
											379736620	500. transketolase [Blastococcus saxobsidens DD2]
												734 aa protein
												YP_005330126.1 GI	379736620
											379746937	501. AraC family transcriptional regulator [Mycobacterium intracellulare ATCC 13950]
												280 aa protein
												YP_005337758.1 GI	379746937
											380013970	502. PREDICTED	G-protein coupled receptor Mth2-like [Apis florea]
												476 aa protein
												XP_003691017.1 GI	380013970
											380482954	503. steroid monooxygenase [Colletotrichum higginsianum]
												575 aa protein
												CCF40917.1 GI	380482954
											383454474	504. hypothetical protein COCOR_02477 [Corallococcus coralloides DSM 2259]
												219 aa protein
												YP_005368463.1 GI	383454474
											383759683	505. aconitate hydrase 1 [Rubrivivax gelatinosus IL144]
												909 aa protein
												YP_005438669.1 GI	383759683
											383772540	506. transcriptional regulator [Bradyrhizobium sp. S23321]
												265 aa protein
												YP_005451606.1 GI	383772540
											383778056	507. hypothetical protein AMIS_28860 [Actinoplanes missouriensis 431]
												283 aa protein
												YP_005462622.1 GI	383778056
											383791315	508. glycine/D-amino acid oxidase, deaminating [Spirochaeta africana DSM 8902]
												405 aa protein
												YP_005475889.1 GI	383791315
											384209762	509. spermidine/putrescine transport ATP-binding protein PotA [Brachyspira intermedia PWS/A]
												400 aa protein
												YP_005595482.1 GI	384209762
											384253629	510. hypothetical protein COCSUDRAFT_38859 [Coccomyxa subellipsoidea C-169]
												691 aa protein
												EIE27103.1 GI	384253629
											384494828	511. hypothetical protein RO3G_10029 [Rhizopus delemar RA 99-880]
												181 aa protein
												EIE85319.1 GI	384494828
											384541256	512. hypothetical protein SM11_pC1457 [Sinorhizobium meliloti SM11]
												369 aa protein
												YP_005725339.1 GI	384541256
											386359530	513. hypothetical protein TtJL18_0065 [Thermus thermophilus JL-18]
												147 aa protein
												YP_006057775.1 GI	386359530
											386363259	514. ribosome maturation factor rimP [Streptococcus pyogenes Alab49]
												178 aa protein
												YP_006072590.1 GI	386363259
											386836207	515. alpha-galactosidase [Streptomyces hygroscopicus subsp. jinggangensis 5008]
												693 aa protein
												YP_006241265.1 GI	386836207
											386849277	516. hypothetical protein ACPL_4331 [Actinoplanes sp. SE50/110]
												386 aa protein
												YP_006267290.1 GI	386849277
											386857892	517. Phenylalanyl-tRNA synthetase, beta subunit [Deinococcus gobiensis I-0]
												816 aa protein
												YP_006262069.1 GI	386857892
											387593025	518. hypothetical protein NEQG_01493 [Nematocida parisii ERTm3]
												1466 aa protein
												EIJ88049.1 GI	387593025
											387875465	519. AraC family transcriptional regulator [Mycobacterium sp. MOTT36Y]
												300 aa protein
												YP_006305769.1 GI	387875465
											387893713	520. GntR family transcriptional regulator [Pseudomonas fluorescens A506]
												477 aa protein
												YP_006324010.1 GI	387893713
											387914812	521. agmat-prov protein [Callorhinchus milii]
												346 aa protein
												AFK11015.1 GI	387914812
											388513569	522. unknown [Lotus japonicus]
												212 aa protein
												AFK44846.1 GI	388513569
											388580582	523. MFS general substrate transporter [Wallemia sebi CBS 633.66]
												521 aa protein
												EIM20896.1 GI	388580582
											388851572	524. uncharacterized protein UHOR_01534 [Ustilago hordei]
												1682 aa protein
												CCF54762.1 GI	388851572
											388858505	525. related to nuclear division protein Rft1 [Ustilago hordei]
												630 aa protein
												CCF47989.1 GI	388858505
											389634287	526. acyl-CoA desaturase [Magnaporthe oryzae 70-15]
												475 aa protein
												XP_003714796.1 GI	389634287
											389741267	527. hypothetical protein STEHIDRAFT_124570 [Stereum hirsutum FP-91666 SS1]
												367 aa protein
												EIM82456.1 GI	389741267
											389742710	528. hypothetical protein STEHIDRAFT_140892 [Stereum hirsutum FP-91666 SS1]
												390 aa protein
												EIM83896.1 GI	389742710
											389747190	529. DEAD-domain-containing protein [Stereum hirsutum FP-91666 SS1]
												554 aa protein
												EIM88369.1 GI	389747190
											389865267	530. transketolase [Modestobacter marinus]
												743 aa protein
												YP_006367508.1 GI	389865267
											390346860	531. PREDICTED	1-phosphatidylinositol 4,5-bisphosphate phosphodiesterase beta-4 [Strongylocentrotus purpuratus]
												1208 aa protein
												XP_792233.2 GI	390346860
											390946513	532. alpha-amylase/alpha-mannosidase [Alistipes finegoldii DSM 17242]
												404 aa protein
												YP_006410273.1 GI	390946513
											390949284	533. putative O-linked N-acetylglucosamine transferase, SPINDLY family [Thiocystis violascens DSM 198]
												749 aa protein
												YP_006413043.1 GI	390949284
											390956576	534. hypothetical protein Terro_0661 [Terriglobus roseus DSM 18391]
												346 aa protein
												YP_006420333.1 GI	390956576
											392398721	535. acetyltransferase, ribosomal protein N-acetylase [Flexibacter litoralis DSM 6794]
												168 aa protein
												YP_006435322.1 GI	392398721
											392402766	536. hypothetical protein Turpa_1224 [Turneriella parva DSM 21527]
												150 aa protein
												YP_006439378.1 GI	392402766
											392406229	537. hypothetical protein Mycch_5905 [Mycobacterium chubuense NBB4]
												412 aa protein
												YP_006442839.1 GI	392406229
											392412804	538. succinate dehydrogenase/fumarate reductase flavoprotein subunit [Desulfomonile tiedjei DSM 6799]
												559 aa protein
												YP_006449411.1 GI	392412804
											392557659	539. hypothetical protein TRAVEDRAFT_54892, partial [Trametes versicolor FP-101664 SS1]
												393 aa protein
												EIW51107.1 GI	392557659
											392558030	540. hypothetical protein TRAVEDRAFT_137632 [Trametes versicolor FP-101664 SS1]
												249 aa protein
												EIW51292.1 GI	392558030
											392572988	541. hypothetical protein TREMEDRAFT_65723 [Tremella mesenterica DSM 1558]
												1055 aa protein
												EIW66130.1 GI	392572988
											392584814	542. hypothetical protein CONPUDRAFT_78300 [Coniophora puteana RWD-64-598 SS2]
												568 aa protein
												EIW74157.1 GI	392584814
											393222015	543. hypothetical protein FOMMEDRAFT_73874 [Fomitiporia mediterranea MF3/22]
												265 aa protein
												EJD07499.1 GI	393222015
											393240560	544. hypothetical protein AURDEDRAFT_163053 [Auricularia delicata TFB-10046 SS5]
												1130 aa protein
												EJD48086.1 GI	393240560
											395330344	545. hypothetical protein DICSQDRAFT_146391 [Dichomitus squalens LYAD-421 SS1]
												275 aa protein
												EJF62728.1 GI	395330344
											395332751	546. hypothetical protein DICSQDRAFT_98693 [Dichomitus squalens LYAD-421 SS1]
												1058 aa protein
												EJF65129.1 GI	395332751
											395502315	547. PREDICTED	alpha-protein kinase 3 [Sarcophilus harrisii]
												1429 aa protein
												XP_003755527.1 GI	395502315
											396475108	548. hypothetical protein LEMA_P111470.1 [Leptosphaeria maculans JN3]
												655 aa protein
												XP_003839707.1 GI	396475108
											397605426	549. hypothetical protein THAOC_20824, partial [Thalassiosira oceanica]
												226 aa protein
												EJK59007.1 GI	397605426
											397669923	550. dihydrodipicolinate synthase [Propionibacterium propionicum F0230a]
												296 aa protein
												YP_006511458.1 GI	397669923
											397772941	551. multi-sensor signal transduction histidine kinase [Natrinema sp. J7-2]
												580 aa protein
												YP_006540487.1 GI	397772941
											397780855	552. 50S ribosomal protein L24P [Methanoculleus bourgensis MS2]
												121 aa protein
												YP_006545328.1 GI	397780855
											399117552	553. apocytochrome b (mitochondrion) [Claviceps purpurea]
												409 aa protein
												CCE35437.1 GI	399117552
											399218530	554. unnamed protein product [Babesia microti strain RI]
												3364 aa protein
												CCF75417.1 GI	399218530
											399218880	555. unnamed protein product [Babesia microti strain RI]
												578 aa protein
												CCF75767.1 GI	399218880
											401408111	556. conserved hypothetical protein [Neospora caninum Liverpool]
												159 aa protein
												XP_003883504.1 GI	401408111
											401408963	557. putative protein kinase [Neospora caninum Liverpool]
												1793 aa protein
												XP_003883930.1 GI	401408963
											401884837	558. hypothetical protein A1Q1_01967 [Trichosporon asahii var. asahii CBS 2479]
												1664 aa protein
												EJT48978.1 GI	401884837
											402220835	559. hypothetical protein DACRYDRAFT_89364 [Dacryopinax sp. DJM-731 SS1]
												1177 aa protein
												EJU00905.1 GI	402220835
											402224361	560. hypothetical protein DACRYDRAFT_105484 [Dacryopinax sp. DJM-731 SS1]
												136 aa protein
												EJU04424.1 GI	402224361
											402226254	561. hypothetical protein DACRYDRAFT_19525 [Dacryopinax sp. DJM-731 SS1]
												108 aa protein
												EJU06314.1 GI	402226254
											402226440	562. hypothetical protein DACRYDRAFT_113194 [Dacryopinax sp. DJM-731 SS1]
												1022 aa protein
												EJU06500.1 GI	402226440
											402466173	563. hypothetical protein EDEG_03760 [Edhazardia aedis USNM 41457]
												383 aa protein
												EJW01717.1 GI	402466173
											403176367	564. hypothetical protein PGTG_16647 [Puccinia graminis f. sp. tritici CRL 75-36-700-3]
												521 aa protein
												XP_003335040.2 GI	403176367
											403223372	565. conserved hypothetical protein [Theileria orientalis strain Shintoku]
												230 aa protein
												BAM41503.1 GI	403223372
											403264571	566. PREDICTED	DDB1- and CUL4-associated factor 4 isoform X2 [Saimiri boliviensis boliviensis]
												495 aa protein
												XP_003924549.1 GI	403264571
											403369965	567. hypothetical protein OXYTRI_17309 [Oxytricha trifallax]
												713 aa protein
												EJY84840.1 GI	403369965
											403418217	568. predicted protein [Fibroporia radiculosa]
												842 aa protein
												CCM04917.1 GI	403418217
											404496646	569. hypothetical protein Gmet_1785 [Geobacter metallireducens GS-15]
												391 aa protein
												YP_006720752.1 GI	404496646
											405958289	570. Histone-lysine N-methyltransferase MLL3 [Crassostrea gigas]
												4990 aa protein
												EKC24431.1 GI	405958289
											406032789	571. 1,4-dihydroxy-2-naphthoateoctaprenyl transferase [Mycobacterium indicus pranii MTCC 9506]
												266 aa protein
												YP_006731681.1 GI	406032789
											406699776	572. hypothetical protein A1Q2_02689 [Trichosporon asahii var. asahii CBS 8904]
												245 aa protein
												EKD02972.1 GI	406699776
											406876309	573. hypothetical protein ACD_79C01446G0004 [uncultured bacterium]
												839 aa protein
												EKD25907.1 GI	406876309
											406884781	574. hypothetical protein ACD_77C00174G0016 [uncultured bacterium]
												346 aa protein
												EKD32126.1 GI	406884781
											406938164	575. hypothetical protein ACD_46C00181G0013 [uncultured bacterium]
												328 aa protein
												EKD71448.1 GI	406938164
											407649031	576. lipase [Nocardia brasiliensis ATCC 700358]
[truncated: 1,226 more rows]
