# Supplementary material for: Interrogating the recognition landscape of a conserved HIV-specific TCR reveals distinct bacterial peptide cross-reactivity
Source: eLife. 2020 Jul 27;9:e58128. doi: 10.7554/eLife.58128 (PMC7384859; doi:10.7554/eLife.58128)
Supplement: Source data 3. [file elife-58128-data3.xlsx]

## Sheet: table 
					ELISA 1	ELISA 2	Avg		NetMHC affinity pred	absorbance @450 ELISA (avg)
			B57HdH_1	LTISPEIPPYF				B57HdH_1	0.358	0.723
			B57HdH_2	LTISPEIPSYF	0.75	0.696	0.723	B57HdH_2	0.428	1.1395
			B57HdH_3	LTITPEIAPYF	1.101	1.178	1.1395	B57HdH_3	0.651	1.1655
			B57HdH_4	LTITPEIRPYF	1.179	1.152	1.1655	B57HdH_4	0.487	1.159
			B57HdH_5	LTISEELPPYF	1.102	1.216	1.159	B57HdH_5	0.457	1.0005
			B57HdH_6	LEISPELPPYF	1.014	0.987	1.0005	B57HdH_6	2.36	0.6
			B57HdH_7	LSITPEIAPYF	0.616	0.584	0.6	B57HdH_7	0.576	1.1375
			B57HdH_8	LSITPEISPYF	1.028	1.247	1.1375	B57HdH_8	0.479	0.973
			B57HdH_9	LAITPEIAPYF	0.853	1.093	0.973	B57HdH_9	1.37	0.921
			B57HdH_10	LTITPEIAPFF	0.944	0.898	0.921	B57HdH_10	0.772	0.914
			B57HdH_11	LTLTPEIAPYF	0.875	0.953	0.914	B57HdH_11	0.621	0.873
			KF11	KAFSPEVIPMF	0.801	0.946	0.8735	KF11	0.203	0.685
			Peptide	p1	p2	p3	p4	p5	p6	p7	p8	p9	p10	p11	absorbance @450 ELISA (avg)
			B57HdH_3	L	T	I	T	P	E	I	A	P	Y	F	1.1655
			B57HdH_4	L	T	I	T	P	E	I	R	P	Y	F	1.159
			B57HdH_2	L	T	I	S	P	E	I	P	S	Y	F	1.1395
			B57HdH_7	L	S	I	T	P	E	I	A	P	Y	F	1.1375
			B57HdH_5	L	T	I	S	E	E	L	P	P	Y	F	1.0005
			B57HdH_8	L	S	I	T	P	E	I	S	P	Y	F	0.973
			B57HdH_9	L	A	I	T	P	E	I	A	P	Y	F	0.921
			B57HdH_10	L	T	I	T	P	E	I	A	P	F	F	0.914
			B57HdH_11	L	T	L	T	P	E	I	A	P	Y	F	0.873
			B57HdH_1	L	T	I	S	P	E	I	P	P	Y	F	0.723
			KF11	K	A	F	S	P	E	V	I	P	M	F	0.685
			B57HdH_6	L	E	I	S	P	E	L	P	P	Y	F	0.6

## Sheet: NetPAN 4.1
# NetMHCpan version 4.1
# Tmpdir made /usr/opt/www/webface/tmp/server/netmhcpan/5ECE271E00003F59BCFEAC63/netMHCpanljurE6
# Input is in FSA format
# Peptide length 11
# Make EL predictions
HLA-B57:01 : Distance to training data 0.000 (using nearest neighbor HLA-B57:01)
# Rank Threshold for Strong binding peptides 0.500
# Rank Threshold for Weak binding peptides 2.000
---------------------------------------------------------------------------------------------------------------------------
Pos MHC Peptide Core Of Gp Gl Ip Il Icore Identity Score_EL %Rank_EL BindLevel
---------------------------------------------------------------------------------------------------------------------------
1 HLA-B*57:01 LTISPEIPPYF LTISPPPYF 0 5 2 0 0 LTISPEIPPYF B57HdH_1_ 0.7864990 0.358 <= SB
---------------------------------------------------------------------------------------------------------------------------
Protein B57HdH_1_. Allele HLA-B*57:01. Number of high binders 1. Number of weak binders 0. Number of peptides 1
Link to Allele Frequencies in Worldwide Populations HLA-B57:01
-----------------------------------------------------------------------------------
# Rank Threshold for Strong binding peptides 0.500
# Rank Threshold for Weak binding peptides 2.000
---------------------------------------------------------------------------------------------------------------------------
Pos MHC Peptide Core Of Gp Gl Ip Il Icore Identity Score_EL %Rank_EL BindLevel
---------------------------------------------------------------------------------------------------------------------------
1 HLA-B*57:01 LTISPEIPSYF LTIEIPSYF 0 3 2 0 0 LTISPEIPSYF B57HdH_2 0.7409530 0.428 <= SB
---------------------------------------------------------------------------------------------------------------------------
Protein B57HdH_2. Allele HLA-B*57:01. Number of high binders 1. Number of weak binders 0. Number of peptides 1
Link to Allele Frequencies in Worldwide Populations HLA-B57:01
-----------------------------------------------------------------------------------
# Rank Threshold for Strong binding peptides 0.500
# Rank Threshold for Weak binding peptides 2.000
---------------------------------------------------------------------------------------------------------------------------
Pos MHC Peptide Core Of Gp Gl Ip Il Icore Identity Score_EL %Rank_EL BindLevel
---------------------------------------------------------------------------------------------------------------------------
1 HLA-B*57:01 LTITPEIAPYF LTITPEPYF 0 6 2 0 0 LTITPEIAPYF B57HdH_3 0.6052070 0.651 <= WB
---------------------------------------------------------------------------------------------------------------------------
Protein B57HdH_3. Allele HLA-B*57:01. Number of high binders 0. Number of weak binders 1. Number of peptides 1
Link to Allele Frequencies in Worldwide Populations HLA-B57:01
-----------------------------------------------------------------------------------
# Rank Threshold for Strong binding peptides 0.500
# Rank Threshold for Weak binding peptides 2.000
---------------------------------------------------------------------------------------------------------------------------
Pos MHC Peptide Core Of Gp Gl Ip Il Icore Identity Score_EL %Rank_EL BindLevel
---------------------------------------------------------------------------------------------------------------------------
1 HLA-B*57:01 LTITPEIRPYF LTIEIRPYF 0 3 2 0 0 LTITPEIRPYF B57HdH_4 0.7018730 0.487 <= SB
---------------------------------------------------------------------------------------------------------------------------
Protein B57HdH_4. Allele HLA-B*57:01. Number of high binders 1. Number of weak binders 0. Number of peptides 1
Link to Allele Frequencies in Worldwide Populations HLA-B57:01
-----------------------------------------------------------------------------------
# Rank Threshold for Strong binding peptides 0.500
# Rank Threshold for Weak binding peptides 2.000
---------------------------------------------------------------------------------------------------------------------------
Pos MHC Peptide Core Of Gp Gl Ip Il Icore Identity Score_EL %Rank_EL BindLevel
---------------------------------------------------------------------------------------------------------------------------
1 HLA-B*57:01 LTISEELPPYF LTISEPPYF 0 5 2 0 0 LTISEELPPYF B57HdH_5 0.7215520 0.457 <= SB
---------------------------------------------------------------------------------------------------------------------------
Protein B57HdH_5. Allele HLA-B*57:01. Number of high binders 1. Number of weak binders 0. Number of peptides 1
Link to Allele Frequencies in Worldwide Populations HLA-B57:01
-----------------------------------------------------------------------------------
# Rank Threshold for Strong binding peptides 0.500
# Rank Threshold for Weak binding peptides 2.000
---------------------------------------------------------------------------------------------------------------------------
Pos MHC Peptide Core Of Gp Gl Ip Il Icore Identity Score_EL %Rank_EL BindLevel
---------------------------------------------------------------------------------------------------------------------------
1 HLA-B*57:01 LEISPELPPYF LSPELPPYF 0 1 2 0 0 LEISPELPPYF B57HdH_6 0.1562090 2.360
---------------------------------------------------------------------------------------------------------------------------
Protein B57HdH_6. Allele HLA-B*57:01. Number of high binders 0. Number of weak binders 0. Number of peptides 1
Link to Allele Frequencies in Worldwide Populations HLA-B57:01
-----------------------------------------------------------------------------------
# Rank Threshold for Strong binding peptides 0.500
# Rank Threshold for Weak binding peptides 2.000
---------------------------------------------------------------------------------------------------------------------------
Pos MHC Peptide Core Of Gp Gl Ip Il Icore Identity Score_EL %Rank_EL BindLevel
---------------------------------------------------------------------------------------------------------------------------
1 HLA-B*57:01 LSITPEIAPYF LSITPEPYF 0 6 2 0 0 LSITPEIAPYF B57HdH_7 0.6471120 0.576 <= WB
---------------------------------------------------------------------------------------------------------------------------
Protein B57HdH_7. Allele HLA-B*57:01. Number of high binders 0. Number of weak binders 1. Number of peptides 1
Link to Allele Frequencies in Worldwide Populations HLA-B57:01
-----------------------------------------------------------------------------------
# Rank Threshold for Strong binding peptides 0.500
# Rank Threshold for Weak binding peptides 2.000
---------------------------------------------------------------------------------------------------------------------------
Pos MHC Peptide Core Of Gp Gl Ip Il Icore Identity Score_EL %Rank_EL BindLevel
---------------------------------------------------------------------------------------------------------------------------
1 HLA-B*57:01 LSITPEISPYF LSIEISPYF 0 3 2 0 0 LSITPEISPYF B57HdH_8 0.7070600 0.479 <= SB
---------------------------------------------------------------------------------------------------------------------------
Protein B57HdH_8. Allele HLA-B*57:01. Number of high binders 1. Number of weak binders 0. Number of peptides 1
Link to Allele Frequencies in Worldwide Populations HLA-B57:01
-----------------------------------------------------------------------------------
# Rank Threshold for Strong binding peptides 0.500
# Rank Threshold for Weak binding peptides 2.000
---------------------------------------------------------------------------------------------------------------------------
Pos MHC Peptide Core Of Gp Gl Ip Il Icore Identity Score_EL %Rank_EL BindLevel
---------------------------------------------------------------------------------------------------------------------------
1 HLA-B*57:01 LAITPEIAPYF LAITPEIYF 0 7 2 0 0 LAITPEIAPYF B57HdH_9 0.3158400 1.370 <= WB
---------------------------------------------------------------------------------------------------------------------------
Protein B57HdH_9. Allele HLA-B*57:01. Number of high binders 0. Number of weak binders 1. Number of peptides 1
Link to Allele Frequencies in Worldwide Populations HLA-B57:01
-----------------------------------------------------------------------------------
# Rank Threshold for Strong binding peptides 0.500
# Rank Threshold for Weak binding peptides 2.000
---------------------------------------------------------------------------------------------------------------------------
Pos MHC Peptide Core Of Gp Gl Ip Il Icore Identity Score_EL %Rank_EL BindLevel
---------------------------------------------------------------------------------------------------------------------------
1 HLA-B*57:01 LTITPEIAPFF LTITPEPFF 0 6 2 0 0 LTITPEIAPFF B57HdH_10 0.5395580 0.772 <= WB
---------------------------------------------------------------------------------------------------------------------------
Protein B57HdH_10. Allele HLA-B*57:01. Number of high binders 0. Number of weak binders 1. Number of peptides 1
Link to Allele Frequencies in Worldwide Populations HLA-B57:01
-----------------------------------------------------------------------------------
# Rank Threshold for Strong binding peptides 0.500
# Rank Threshold for Weak binding peptides 2.000
---------------------------------------------------------------------------------------------------------------------------
Pos MHC Peptide Core Of Gp Gl Ip Il Icore Identity Score_EL %Rank_EL BindLevel
---------------------------------------------------------------------------------------------------------------------------
1 HLA-B*57:01 LTLTPEIAPYF LTLTPEIYF 0 7 2 0 0 LTLTPEIAPYF B57HdH_11 0.6213410 0.621 <= WB
---------------------------------------------------------------------------------------------------------------------------
Protein B57HdH_11. Allele HLA-B*57:01. Number of high binders 0. Number of weak binders 1. Number of peptides 1
Link to Allele Frequencies in Worldwide Populations HLA-B57:01
-----------------------------------------------------------------------------------
# Rank Threshold for Strong binding peptides 0.500
# Rank Threshold for Weak binding peptides 2.000
---------------------------------------------------------------------------------------------------------------------------
Pos MHC Peptide Core Of Gp Gl Ip Il Icore Identity Score_EL %Rank_EL BindLevel
---------------------------------------------------------------------------------------------------------------------------
1 HLA-B*57:01 KAFSPEVIPMF KAFSPIPMF 0 5 2 0 0 KAFSPEVIPMF KF11 0.8856020 0.203 <= SB
---------------------------------------------------------------------------------------------------------------------------
Protein KF11. Allele HLA-B*57:01. Number of high binders 1. Number of weak binders 0. Number of peptides 1
Link to Allele Frequencies in Worldwide Populations HLA-B57:01
-----------------------------------------------------------------------------------
Explain the output. Go back.

## Sheet: ELISA data
				HdH1		0.75	0.696	0.723
				HdH2		1.101	1.178	1.1395
				HdH3		1.179	1.152	1.1655
				HdH4		1.102	1.216	1.159
				HdH5		1.014	0.987	1.0005
				HdH6		0.616	0.584	0.6
				HdH7		1.028	1.247	1.1375
				HdH8		0.853	1.093	0.973
				HdH9		0.944	0.898	0.921
				HdH10		0.875	0.953	0.914
				HdH11		0.801	0.946	0.8735
				KF11		0.651	0.719	0.685
